# Supplementary material for: Yaws elimination in Ecuador: Findings of a serological survey of children in Esmeraldas province to evaluate interruption of transmission
Source: PLoS Negl Trop Dis. 2022 May 25;16(5):e0010173. doi: 10.1371/journal.pntd.0010173 (PMC9132314; doi:10.1371/journal.pntd.0010173)
Supplement: S1 Data — (XLSX) [file pntd.0010173.s006.xlsx]

## Sheet: Sheet1
ID	Age	Ethnicity	Localidad	Localidad_code	new_code	Formerly_endemic	sex	date	Year	Onesite	DPP_trp	DPP_no_trep	DPP_result	Seropositivity	DPP_result_2
17537	7	1	Playa de Oro	2	1	1	1	2005-04-23	2005	0			NEGATIVO	0	0
17548	7	1	Playa de Oro	2	1	1	2	2005-04-23	2005	0			NEGATIVO	0	0
17553	7	1	Playa de Oro	2	1	1	2	2005-04-23	2005	0			NEGATIVO	0	0
17570	7	1	Playa de Oro	2	1	1	1	2005-04-23	2005	0			NEGATIVO	0	0
17572	7	1	Playa de Oro	2	1	1	1	2005-04-23	2005	0			NEGATIVO	0	0
17542	8	1	Playa de Oro	2	1	1	1	2005-04-23	2005	0			NEGATIVO	0	0
17543	8	1	Playa de Oro	2	1	1	1	2005-04-23	2005	0			NEGATIVO	0	0
17547	8	1	Playa de Oro	2	1	1	2	2005-04-23	2005	0			NEGATIVO	0	0
17560	8	1	Playa de Oro	2	1	1	2	2005-04-23	2005	0			NEGATIVO	0	0
17564	8	1	Playa de Oro	2	1	1	2	2005-04-23	2005	0			NEGATIVO	0	0
17569	8	1	Playa de Oro	2	1	1	2	2005-04-23	2005	0			NEGATIVO	0	0
17575	8	1	Playa de Oro	2	1	1	1	2005-04-23	2005	0			NEGATIVO	0	0
17571	9	1	Playa de Oro	2	1	1	1	2005-04-23	2005	0			NEGATIVO	0	0
17536	10	1	Playa de Oro	2	1	1	2	2005-04-23	2005	0			NEGATIVO	0	0
17557	10	1	Playa de Oro	2	1	1	2	2005-04-23	2005	0			NEGATIVO	0	0
17558	10	1	Playa de Oro	2	1	1	2	2005-04-23	2005	0			NEGATIVO	0	0
17567	10	1	Playa de Oro	2	1	1	2	2005-04-23	2005	0			NEGATIVO	0	0
17574	10	1	Playa de Oro	2	1	1	1	2005-04-23	2005	0			NEGATIVO	0	0
17538	11	1	Playa de Oro	2	1	1	2	2005-04-23	2005	0			NEGATIVO	0	0
17540	11	1	Playa de Oro	2	1	1	2	2005-04-23	2005	0			NEGATIVO	0	0
17556	11	1	Playa de Oro	2	1	1	2	2005-04-23	2005	0			NEGATIVO	0	0
17559	11	1	Playa de Oro	2	1	1	1	2005-04-23	2005	0			NEGATIVO	0	0
17563	11	1	Playa de Oro	2	1	1	1	2005-04-23	2005	0			NEGATIVO	0	0
17561	12	1	Playa de Oro	2	1	1	2	2005-04-23	2005	0			NEGATIVO	0	0
17566	12	1	Playa de Oro	2	1	1	1	2005-04-23	2005	0			NEGATIVO	0	0
17573	13	1	Playa de Oro	2	1	1	2	2005-04-23	2005	0			NEGATIVO	0	0
17541	14	1	Playa de Oro	2	1	1	1	2005-04-23	2005	0			NEGATIVO	0	0
17550	14	1	Playa de Oro	2	1	1	1	2005-04-23	2005	0			NEGATIVO	0	0
17554	14	1	Playa de Oro	2	1	1	1	2005-04-23	2005	0			NEGATIVO	0	0
17562	14	1	Playa de Oro	2	1	1	1	2005-04-23	2005	0			NEGATIVO	0	0
17555	15	1	Playa de Oro	2	1	1	1	2005-04-23	2005	0			NEGATIVO	0	0
17576	9	1	Playa de Oro	2	1	1	1	2005-04-24	2005	0			NEGATIVO	0	0
17577	12	1	Playa de Oro	2	1	1	1	2005-04-24	2005	0			NEGATIVO	0	0
17549	7	1	Playa de Oro	2	1	1	2	2008-05-08	2008	0			NEGATIVO	0	0
17552	7	1	Playa de Oro	2	1	1	1	2008-05-08	2008	0			NEGATIVO	0	0
17539	9	1	Playa de Oro	2	1	1	1	2008-05-08	2008	0			NEGATIVO	0	0
17551	12	1	Playa de Oro	2	1	1	1	2008-05-08	2008	0			NEGATIVO	0	0
17545	7	1	Playa de Oro	2	1	1	1	2008-05-14	2008	0			NEGATIVO	0	0
17568	8	1	Playa de Oro	2	1	1	1	2008-05-14	2008	0			NEGATIVO	0	0
17565	7	1	Playa de Oro	2	1	1	2	2008-05-21	2008	0			NEGATIVO	0	0
17618	8	1	Angostura	1	2	1	2	2005-04-27	2005	0			NEGATIVO	0	0
17607	9	1	Angostura	1	2	1	1	2005-04-27	2005	0			NEGATIVO	0	0
17608	10	1	Angostura	1	2	1	1	2005-04-27	2005	0			NEGATIVO	0	0
17611	11	1	Angostura	1	2	1	1	2005-04-27	2005	0			NEGATIVO	0	0
17606	12	1	Angostura	1	2	1	2	2005-04-27	2005	0			NEGATIVO	0	0
17610	13	1	Angostura	1	2	1	1	2005-04-27	2005	0			NEGATIVO	0	0
17617	12	1	Angostura	1	2	1	1	2005-09-17	2005	0			NEGATIVO	0	0
17603	5	1	Angostura	1	2	1	1	2008-05-01	2008	0			NEGATIVO	0	0
17605	7	1	Angostura	1	2	1	1	2008-05-10	2008	0			NEGATIVO	0	0
17620	9	1	Angostura	1	2	1	2	2008-05-10	2008	0			NEGATIVO	0	0
17612	10	1	Angostura	1	2	1	2	2008-05-10	2008	0			NEGATIVO	0	0
17613	10	1	Angostura	1	2	1	1	2008-05-10	2008	0			NEGATIVO	0	0
17619	11	1	Angostura	1	2	1	2	2008-05-10	2008	0			NEGATIVO	0	0
17609	14	1	Angostura	1	2	1	1	2008-05-10	2008	0			NEGATIVO	0	0
17600	7	1	Playa Tigre	3	3	1	2	2005-04-28	2005	0			NEGATIVO	0	0
17602	7	1	Playa Tigre	3	3	1	1	2005-04-28	2005	0			NEGATIVO	0	0
17599	8	1	Playa Tigre	3	3	1	1	2005-04-28	2005	0			NEGATIVO	0	0
17579	9	1	Playa Tigre	3	3	1	2	2005-04-28	2005	0			NEGATIVO	0	0
17587	10	1	Playa Tigre	3	3	1	1	2005-04-28	2005	0			NEGATIVO	0	0
17591	10	1	Playa Tigre	3	3	1	2	2005-04-28	2005	0			NEGATIVO	0	0
17598	10	1	Playa Tigre	3	3	1	1	2005-04-28	2005	0			NEGATIVO	0	0
17586	12	1	Playa Tigre	3	3	1	1	2005-04-28	2005	0			NEGATIVO	0	0
17583	13	1	Playa Tigre	3	3	1	2	2005-04-28	2005	0			NEGATIVO	0	0
17621	13	1	Playa Tigre	3	3	1	1	2005-04-28	2005	0			NEGATIVO	0	0
17588	14	1	Playa Tigre	3	3	1	1	2005-04-28	2005	0			NEGATIVO	0	0
17597	14	1	Playa Tigre	3	3	1	2	2005-04-28	2005	0			NEGATIVO	0	0
17582	15	1	Playa Tigre	3	3	1	1	2005-04-28	2005	0			NEGATIVO	0	0
17592	7	1	Playa Tigre	3	3	1	2	2005-04-29	2005	0			NEGATIVO	0	0
17578	11	1	Playa Tigre	3	3	1	1	2005-06-14	2005	0			NEGATIVO	0	0
17585	8	1	Playa Tigre	3	3	1	2	2008-05-11	2008	0			NEGATIVO	0	0
17581	9	1	Playa Tigre	3	3	1	1	2008-05-11	2008	0			NEGATIVO	0	0
17590	9	1	Playa Tigre	3	3	1	2	2008-05-11	2008	0			NEGATIVO	0	0
17596	9	1	Playa Tigre	3	3	1	2	2008-05-11	2008	0			NEGATIVO	0	0
17601	9	1	Playa Tigre	3	3	1	1	2008-05-11	2008	0			NEGATIVO	0	0
17584	10	1	Playa Tigre	3	3	1	2	2008-05-11	2008	0			NEGATIVO	0	0
17595	11	1	Playa Tigre	3	3	1	1	2008-05-11	2008	0			NEGATIVO	0	0
17580	12	1	Playa Tigre	3	3	1	1	2008-05-11	2008	0			NEGATIVO	0	0
17589	10	1	Playa Tigre	3	3	1	2	2009-01-19	2009	0			NEGATIVO	0	0
17663	9	1	Playa Nueva	4	3	1	2	2005-04-26	2005	0			NEGATIVO	0	0
17662	12	1	Playa Nueva	4	3	1	2	2005-04-26	2005	0			NEGATIVO	0	0
17664	12	1	Playa Nueva	4	3	1	2	2005-04-26	2005	0			NEGATIVO	0	0
17661	15	1	Playa Nueva	4	3	1	1	2005-04-26	2005	0			NEGATIVO	0	0
17648	6	1	Zapote	5	3	1	1	2005-04-29	2005	0			NEGATIVO	0	0
17654	6	1	Zapote	5	3	1	1	2005-04-29	2005	0			NEGATIVO	0	0
17641	7	1	Zapote	5	3	1	2	2005-04-29	2005	0			NEGATIVO	0	0
17646	7	1	Zapote	5	3	1	2	2005-04-29	2005	0			NEGATIVO	0	0
17649	8	1	Zapote	5	3	1	1	2005-04-29	2005	0			NEGATIVO	0	0
17655	8	1	Zapote	5	3	1	2	2005-04-29	2005	0			NEGATIVO	0	0
17660	8	1	Zapote	5	3	1	1	2005-04-29	2005	0			NEGATIVO	0	0
17669	9	1	Zapote	5	3	1	1	2005-04-29	2005	0			NEGATIVO	0	0
17653	10	1	Zapote	5	3	1	2	2005-04-29	2005	0			NEGATIVO	0	0
17668	10	1	Zapote	5	3	1	2	2005-04-29	2005	0			NEGATIVO	0	0
17671	11	1	Zapote	5	3	1	1	2005-04-29	2005	0			NEGATIVO	0	0
17670	13	1	Zapote	5	3	1	1	2005-04-29	2005	0			NEGATIVO	0	0
17652	9	1	Zapote	5	3	1	1	2005-04-29	2005	1	1	0	TREATED	1	1
17647	9	1	Zapote	5	3	1	2	2006-04-29	2006	0			NEGATIVO	0	0
17650	7	1	Zapote	5	3	1	2	2008-05-14	2008	0			NEGATIVO	0	0
17659	11	1	Zapote	5	3	1	2	2008-05-14	2008	0			NEGATIVO	0	0
17658	9	1	Zapote	5	3	1	1	2009-01-14	2009	0			NEGATIVO	0	0
18201	8	1	Guayabal	7	4	1	1	2005-09-25	2005	0			NEGATIVO	0	0
18207	9	1	Guayabal	7	4	1	1	2005-09-25	2005	0			NEGATIVO	0	0
18205	10	1	Guayabal	7	4	1	2	2005-09-25	2005	0			NEGATIVO	0	0
18206	10	1	Guayabal	7	4	1	2	2005-09-25	2005	0			NEGATIVO	0	0
18213	10	1	Guayabal	7	4	1	1	2005-09-25	2005	0			NEGATIVO	0	0
18210	12	1	Guayabal	7	4	1	1	2005-09-25	2005	0			NEGATIVO	0	0
18203	13	1	Guayabal	7	4	1	1	2005-09-25	2005	0			NEGATIVO	0	0
18204	13	1	Guayabal	7	4	1	1	2005-09-25	2005	0			NEGATIVO	0	0
18211	14	1	Guayabal	7	4	1	1	2005-09-25	2005	0			NEGATIVO	0	0
18215	14	1	Guayabal	7	4	1	2	2005-09-25	2005	0			NEGATIVO	0	0
18216	14	1	Guayabal	7	4	1	2	2005-09-25	2005	0			NEGATIVO	0	0
18209	8	1	Guayabal	7	4	1	1	2008-05-14	2008	0			NEGATIVO	0	0
18198	13	1	Guayabal	7	4	1	1	2008-05-14	2008	0			NEGATIVO	0	0
17629	7	1	Palma Real	6	4	1	1	2005-04-26	2005	0			NEGATIVO	0	0
17632	7	1	Palma Real	6	4	1	2	2005-04-26	2005	0			NEGATIVO	0	0
17634	7	1	Palma Real	6	4	1	1	2005-04-26	2005	0			NEGATIVO	0	0
17638	7	1	Palma Real	6	4	1	2	2005-04-26	2005	0			NEGATIVO	0	0
17622	10	1	Palma Real	6	4	1	1	2005-04-26	2005	0			NEGATIVO	0	0
17623	11	1	Palma Real	6	4	1	1	2005-04-26	2005	0			NEGATIVO	0	0
17643	11	1	Palma Real	6	4	1	1	2005-04-26	2005	0			NEGATIVO	0	0
17645	11	1	Palma Real	6	4	1	1	2005-04-26	2005	0			NEGATIVO	0	0
17636	12	1	Palma Real	6	4	1	1	2005-04-26	2005	0			NEGATIVO	0	0
17642	13	1	Palma Real	6	4	1	2	2005-04-26	2005	0			NEGATIVO	0	0
17630	14	1	Palma Real	6	4	1	2	2005-04-26	2005	0			NEGATIVO	0	0
17637	15	1	Palma Real	6	4	1	1	2005-04-26	2005	0			NEGATIVO	0	0
17639	15	1	Palma Real	6	4	1	1	2005-04-26	2005	0			NEGATIVO	0	0
17665	15	1	Palma Real	6	4	1	1	2005-04-26	2005	0			NEGATIVO	0	0
17631	15	1	Palma Real	6	4	1	2	2005-04-26	2005	0			NEGATIVO	0	0
17624	15	1	Palma Real	6	4	1	1	2005-04-26	2005	1	1	0	TREATED	1	1
17626	8	1	Palma Real	6	4	1	1	2005-07-26	2005	0			NEGATIVO	0	0
17625	10	1	Palma Real	6	4	1	2	2008-05-06	2008	0			NEGATIVO	0	0
17640	9	1	Palma Real	6	4	1	1	2008-05-09	2008	0			NEGATIVO	0	0
17627	10	1	Palma Real	6	4	1	1	2008-05-09	2008	0			NEGATIVO	0	0
17628	10	1	Palma Real	6	4	1	2	2008-05-09	2008	0			NEGATIVO	0	0
17633	12	1	Palma Real	6	4	1	2	2008-05-09	2008	0			NEGATIVO	0	0
17644	10	1	Palma Real	6	4	1	1	2008-05-14	2008	0			NEGATIVO	0	0
17666	12	1	Palma Real	6	4	1	2	2008-05-14	2008	0			NEGATIVO	0	0
17871	8	1	Picadero	8	5	1	2	2005-07-08	2005	0			NEGATIVO	0	0
17872	10	1	Picadero	8	5	1	1	2005-07-08	2005	0			NEGATIVO	0	0
17870	13	1	Picadero	8	5	1	2	2005-07-08	2005	0			NEGATIVO	0	0
17873	15	1	Picadero	8	5	1	2	2005-07-08	2005	0			NEGATIVO	0	0
17878	7	1	Picadero	8	5	1	2	2005-07-09	2005	0			NEGATIVO	0	0
17875	8	1	Picadero	8	5	1	1	2005-07-09	2005	0			NEGATIVO	0	0
17885	8	1	Picadero	8	5	1	2	2005-07-09	2005	0			NEGATIVO	0	0
17892	8	1	Picadero	8	5	1	2	2005-07-09	2005	0			NEGATIVO	0	0
17895	8	1	Picadero	8	5	1	1	2005-07-09	2005	0			NEGATIVO	0	0
17877	9	1	Picadero	8	5	1	2	2005-07-09	2005	0			NEGATIVO	0	0
17889	9	1	Picadero	8	5	1	1	2005-07-09	2005	0			NEGATIVO	0	0
17886	10	1	Picadero	8	5	1	2	2005-07-09	2005	0			NEGATIVO	0	0
17891	10	1	Picadero	8	5	1	2	2005-07-09	2005	0			NEGATIVO	0	0
17881	11	1	Picadero	8	5	1	2	2005-07-09	2005	0			NEGATIVO	0	0
17893	11	1	Picadero	8	5	1	2	2005-07-09	2005	0			NEGATIVO	0	0
17876	12	1	Picadero	8	5	1	2	2005-07-09	2005	0			NEGATIVO	0	0
17890	12	1	Picadero	8	5	1	1	2005-07-09	2005	0			NEGATIVO	0	0
17880	13	1	Picadero	8	5	1	2	2005-07-09	2005	0			NEGATIVO	0	0
17883	13	1	Picadero	8	5	1	1	2005-07-09	2005	0			NEGATIVO	0	0
17882	14	1	Picadero	8	5	1	1	2005-07-09	2005	0			NEGATIVO	0	0
17888	14	1	Picadero	8	5	1	1	2005-07-09	2005	0			NEGATIVO	0	0
17879	15	1	Picadero	8	5	1	2	2005-07-09	2005	0			NEGATIVO	0	0
17884	15	1	Picadero	8	5	1	1	2005-07-09	2005	0			NEGATIVO	0	0
17894	15	1	Picadero	8	5	1	1	2005-07-09	2005	0			NEGATIVO	0	0
17901	8	1	Picadero	8	5	1	2	2005-07-10	2005	0			NEGATIVO	0	0
17897	9	1	Picadero	8	5	1	1	2005-07-10	2005	0			NEGATIVO	0	0
17898	12	1	Picadero	8	5	1	1	2005-07-10	2005	0			NEGATIVO	0	0
17896	15	1	Picadero	8	5	1	1	2005-07-10	2005	0			NEGATIVO	0	0
17899	15	1	Picadero	8	5	1	2	2005-07-10	2005	0			NEGATIVO	0	0
17874	10	1	Picadero	8	5	1	1	2005-07-11	2005	0			NEGATIVO	0	0
17900	11	1	Picadero	8	5	1	2	2007-11-14	2007	0			NEGATIVO	0	0
18073	12	1	Selva Alegre	9	6	1	2	2005-05-07	2005	0			NEGATIVO	0	0
18151	11	1	Selva Alegre	9	6	1	2	2005-07-08	2005	0			NEGATIVO	0	0
18119	13	1	Selva Alegre	9	6	1	2	2005-07-12	2005	0			NEGATIVO	0	0
18152	14	1	Selva Alegre	9	6	1	2	2005-09-07	2005	1	1	1	ACTIVE	1	2
18091	7	1	Selva Alegre	9	6	1	1	2005-09-07	2005	0			NEGATIVO	0	0
18111	7	1	Selva Alegre	9	6	1	2	2005-09-07	2005	0			NEGATIVO	0	0
18145	7	1	Selva Alegre	9	6	1	2	2005-09-07	2005	0			NEGATIVO	0	0
18153	7	1	Selva Alegre	9	6	1	2	2005-09-07	2005	0			NEGATIVO	0	0
18157	7	1	Selva Alegre	9	6	1	2	2005-09-07	2005	0			NEGATIVO	0	0
18164	7	1	Selva Alegre	9	6	1	2	2005-09-07	2005	0			NEGATIVO	0	0
18070	8	1	Selva Alegre	9	6	1	1	2005-09-07	2005	0			NEGATIVO	0	0
18078	8	1	Selva Alegre	9	6	1	2	2005-09-07	2005	0			NEGATIVO	0	0
18080	8	1	Selva Alegre	9	6	1	2	2005-09-07	2005	0			NEGATIVO	0	0
18082	8	1	Selva Alegre	9	6	1	1	2005-09-07	2005	0			NEGATIVO	0	0
18087	8	1	Selva Alegre	9	6	1	1	2005-09-07	2005	0			NEGATIVO	0	0
18088	8	1	Selva Alegre	9	6	1	2	2005-09-07	2005	0			NEGATIVO	0	0
18092	8	1	Selva Alegre	9	6	1	2	2005-09-07	2005	0			NEGATIVO	0	0
18098	8	1	Selva Alegre	9	6	1	2	2005-09-07	2005	0			NEGATIVO	0	0
18107	8	1	Selva Alegre	9	6	1	2	2005-09-07	2005	0			NEGATIVO	0	0
18114	8	1	Selva Alegre	9	6	1	2	2005-09-07	2005	0			NEGATIVO	0	0
18117	8	1	Selva Alegre	9	6	1	2	2005-09-07	2005	0			NEGATIVO	0	0
18127	8	1	Selva Alegre	9	6	1	2	2005-09-07	2005	0			NEGATIVO	0	0
18142	8	1	Selva Alegre	9	6	1	2	2005-09-07	2005	0			NEGATIVO	0	0
18146	8	1	Selva Alegre	9	6	1	1	2005-09-07	2005	0			NEGATIVO	0	0
18162	8	1	Selva Alegre	9	6	1	2	2005-09-07	2005	0			NEGATIVO	0	0
18175	8	1	Selva Alegre	9	6	1	1	2005-09-07	2005	0			NEGATIVO	0	0
18177	8	1	Selva Alegre	9	6	1	2	2005-09-07	2005	0			NEGATIVO	0	0
18181	8	1	Selva Alegre	9	6	1	2	2005-09-07	2005	0			NEGATIVO	0	0
18083	9	1	Selva Alegre	9	6	1	2	2005-09-07	2005	0			NEGATIVO	0	0
18089	9	1	Selva Alegre	9	6	1	1	2005-09-07	2005	0			NEGATIVO	0	0
18108	9	1	Selva Alegre	9	6	1	2	2005-09-07	2005	0			NEGATIVO	0	0
18112	9	1	Selva Alegre	9	6	1	2	2005-09-07	2005	0			NEGATIVO	0	0
18118	9	1	Selva Alegre	9	6	1	1	2005-09-07	2005	0			NEGATIVO	0	0
18131	9	1	Selva Alegre	9	6	1	2	2005-09-07	2005	0			NEGATIVO	0	0
18133	9	1	Selva Alegre	9	6	1	2	2005-09-07	2005	0			NEGATIVO	0	0
18150	9	1	Selva Alegre	9	6	1	1	2005-09-07	2005	0			NEGATIVO	0	0
18169	9	1	Selva Alegre	9	6	1	2	2005-09-07	2005	0			NEGATIVO	0	0
18173	9	1	Selva Alegre	9	6	1	2	2005-09-07	2005	0			NEGATIVO	0	0
18183	9	1	Selva Alegre	9	6	1	1	2005-09-07	2005	0			NEGATIVO	0	0
18071	10	1	Selva Alegre	9	6	1	1	2005-09-07	2005	0			NEGATIVO	0	0
18075	10	1	Selva Alegre	9	6	1	2	2005-09-07	2005	0			NEGATIVO	0	0
18076	10	1	Selva Alegre	9	6	1	2	2005-09-07	2005	0			NEGATIVO	0	0
18077	10	1	Selva Alegre	9	6	1	1	2005-09-07	2005	0			NEGATIVO	0	0
18079	10	1	Selva Alegre	9	6	1	1	2005-09-07	2005	0			NEGATIVO	0	0
18085	10	1	Selva Alegre	9	6	1	2	2005-09-07	2005	0			NEGATIVO	0	0
18094	10	1	Selva Alegre	9	6	1	1	2005-09-07	2005	0			NEGATIVO	0	0
18143	10	1	Selva Alegre	9	6	1	2	2005-09-07	2005	0			NEGATIVO	0	0
18159	10	1	Selva Alegre	9	6	1	1	2005-09-07	2005	0			NEGATIVO	0	0
18180	10	1	Selva Alegre	9	6	1	1	2005-09-07	2005	0			NEGATIVO	0	0
18081	11	1	Selva Alegre	9	6	1	1	2005-09-07	2005	0			NEGATIVO	0	0
18084	11	1	Selva Alegre	9	6	1	2	2005-09-07	2005	0			NEGATIVO	0	0
18096	11	1	Selva Alegre	9	6	1	1	2005-09-07	2005	0			NEGATIVO	0	0
18097	11	1	Selva Alegre	9	6	1	1	2005-09-07	2005	0			NEGATIVO	0	0
18103	11	1	Selva Alegre	9	6	1	1	2005-09-07	2005	0			NEGATIVO	0	0
18116	11	1	Selva Alegre	9	6	1	2	2005-09-07	2005	0			NEGATIVO	0	0
18135	11	1	Selva Alegre	9	6	1	1	2005-09-07	2005	0			NEGATIVO	0	0
18148	11	1	Selva Alegre	9	6	1	2	2005-09-07	2005	0			NEGATIVO	0	0
18167	11	1	Selva Alegre	9	6	1	2	2005-09-07	2005	0			NEGATIVO	0	0
18170	11	1	Selva Alegre	9	6	1	2	2005-09-07	2005	0			NEGATIVO	0	0
18105	12	1	Selva Alegre	9	6	1	1	2005-09-07	2005	0			NEGATIVO	0	0
18123	12	1	Selva Alegre	9	6	1	1	2005-09-07	2005	0			NEGATIVO	0	0
18166	12	1	Selva Alegre	9	6	1	1	2005-09-07	2005	0			NEGATIVO	0	0
18095	13	1	Selva Alegre	9	6	1	1	2005-09-07	2005	0			NEGATIVO	0	0
18099	13	1	Selva Alegre	9	6	1	2	2005-09-07	2005	0			NEGATIVO	0	0
18104	13	1	Selva Alegre	9	6	1	2	2005-09-07	2005	0			NEGATIVO	0	0
18110	13	1	Selva Alegre	9	6	1	2	2005-09-07	2005	0			NEGATIVO	0	0
18149	13	1	Selva Alegre	9	6	1	1	2005-09-07	2005	0			NEGATIVO	0	0
18178	13	1	Selva Alegre	9	6	1	1	2005-09-07	2005	0			NEGATIVO	0	0
18184	13	1	Selva Alegre	9	6	1	2	2005-09-07	2005	0			NEGATIVO	0	0
18086	14	1	Selva Alegre	9	6	1	2	2005-09-07	2005	0			NEGATIVO	0	0
18109	14	1	Selva Alegre	9	6	1	2	2005-09-07	2005	0			NEGATIVO	0	0
18141	14	1	Selva Alegre	9	6	1	2	2005-09-07	2005	0			NEGATIVO	0	0
18156	14	1	Selva Alegre	9	6	1	1	2005-09-07	2005	0			NEGATIVO	0	0
18158	14	1	Selva Alegre	9	6	1	1	2005-09-07	2005	0			NEGATIVO	0	0
18100	15	1	Selva Alegre	9	6	1	1	2005-09-07	2005	0			NEGATIVO	0	0
18122	15	1	Selva Alegre	9	6	1	1	2005-09-07	2005	0			NEGATIVO	0	0
18129	15	1	Selva Alegre	9	6	1	1	2005-09-07	2005	0			NEGATIVO	0	0
18137	15	1	Selva Alegre	9	6	1	1	2005-09-07	2005	0			NEGATIVO	0	0
18172	15	1	Selva Alegre	9	6	1	2	2005-09-07	2005	0			NEGATIVO	0	0
18174	15	1	Selva Alegre	9	6	1	2	2005-09-07	2005	0			NEGATIVO	0	0
18179	15	1	Selva Alegre	9	6	1	2	2005-09-07	2005	0			NEGATIVO	0	0
18190	15	1	Selva Alegre	9	6	1	1	2005-09-07	2005	0			NEGATIVO	0	0
18139	8	1	Selva Alegre	9	6	1	1	2005-09-07	2005	1	1	0	TREATED	1	1
18069	7	1	Selva Alegre	9	6	1	1	2005-09-08	2005	0			NEGATIVO	0	0
18101	8	1	Selva Alegre	9	6	1	1	2005-09-08	2005	0			NEGATIVO	0	0
18138	8	1	Selva Alegre	9	6	1	1	2005-09-08	2005	0			NEGATIVO	0	0
18140	8	1	Selva Alegre	9	6	1	2	2005-09-08	2005	0			NEGATIVO	0	0
18171	9	1	Selva Alegre	9	6	1	1	2005-09-08	2005	0			NEGATIVO	0	0
18124	10	1	Selva Alegre	9	6	1	2	2005-09-08	2005	0			NEGATIVO	0	0
18120	11	1	Selva Alegre	9	6	1	1	2005-09-08	2005	0			NEGATIVO	0	0
18136	11	1	Selva Alegre	9	6	1	1	2005-09-08	2005	0			NEGATIVO	0	0
18165	11	1	Selva Alegre	9	6	1	1	2005-09-08	2005	0			NEGATIVO	0	0
18186	11	1	Selva Alegre	9	6	1	1	2005-09-08	2005	0			NEGATIVO	0	0
18191	11	1	Selva Alegre	9	6	1	1	2005-09-08	2005	0			NEGATIVO	0	0
18155	12	1	Selva Alegre	9	6	1	2	2005-09-08	2005	0			NEGATIVO	0	0
18125	13	1	Selva Alegre	9	6	1	1	2005-09-08	2005	0			NEGATIVO	0	0
18128	13	1	Selva Alegre	9	6	1	2	2005-09-08	2005	0			NEGATIVO	0	0
18132	13	1	Selva Alegre	9	6	1	1	2005-09-08	2005	0			NEGATIVO	0	0
18189	13	1	Selva Alegre	9	6	1	1	2005-09-08	2005	0			NEGATIVO	0	0
18093	14	1	Selva Alegre	9	6	1	1	2005-09-08	2005	0			NEGATIVO	0	0
18130	14	1	Selva Alegre	9	6	1	2	2005-09-08	2005	0			NEGATIVO	0	0
18144	14	1	Selva Alegre	9	6	1	1	2005-09-08	2005	0			NEGATIVO	0	0
18192	14	1	Selva Alegre	9	6	1	2	2005-09-08	2005	0			NEGATIVO	0	0
18194	14	2	Selva Alegre	9	6	1	2	2005-09-08	2005	0			NEGATIVO	0	0
18126	15	1	Selva Alegre	9	6	1	1	2005-09-08	2005	0			NEGATIVO	0	0
18182	15	1	Selva Alegre	9	6	1	1	2005-09-08	2005	0			NEGATIVO	0	0
18193	15	1	Selva Alegre	9	6	1	1	2005-09-08	2005	0			NEGATIVO	0	0
18102	7	1	Selva Alegre	9	6	1	1	2005-09-10	2005	0			NEGATIVO	0	0
18188	9	1	Selva Alegre	9	6	1	1	2005-09-10	2005	0			NEGATIVO	0	0
18195	14	1	Selva Alegre	9	6	1	2	2005-09-10	2005	0			NEGATIVO	0	0
18187	15	1	Selva Alegre	9	6	1	1	2005-09-10	2005	0			NEGATIVO	0	0
18074	10	1	Selva Alegre	9	6	1	1	2005-09-23	2005	0			NEGATIVO	0	0
18160	7	1	Selva Alegre	9	6	1	2	2005-11-01	2005	0			NEGATIVO	0	0
18698	13	1	Selva Alegre	9	6	1	2	2005-12-03	2005	0			NEGATIVO	0	0
18113	12	1	Selva Alegre	9	6	1	1	2006-09-07	2006	0			NEGATIVO	0	0
18121	7	1	Selva Alegre	9	6	1	1	2007-11-12	2007	0			NEGATIVO	0	0
18154	7	1	Selva Alegre	9	6	1	1	2007-11-12	2007	0			NEGATIVO	0	0
18147	10	1	Selva Alegre	9	6	1	1	2007-11-12	2007	0			NEGATIVO	0	0
18106	11	1	Selva Alegre	9	6	1	1	2007-11-12	2007	0			NEGATIVO	0	0
18072	13	1	Selva Alegre	9	6	1	2	2007-11-12	2007	0			NEGATIVO	0	0
18168	13	1	Selva Alegre	9	6	1	1	2007-11-12	2007	0			NEGATIVO	0	0
18134	13	1	Selva Alegre	9	6	1	2	2007-11-13	2007	0			NEGATIVO	0	0
17906	7	1	El Porvenir	11	7	1	1	2005-07-12	2005	0			NEGATIVO	0	0
17916	7	1	El Porvenir	11	7	1	2	2005-07-12	2005	0			NEGATIVO	0	0
17924	7	1	El Porvenir	11	7	1	1	2005-07-12	2005	0			NEGATIVO	0	0
17902	8	1	El Porvenir	11	7	1	2	2005-07-12	2005	0			NEGATIVO	0	0
17903	8	1	El Porvenir	11	7	1	1	2005-07-12	2005	0			NEGATIVO	0	0
17908	8	1	El Porvenir	11	7	1	2	2005-07-12	2005	0			NEGATIVO	0	0
17909	9	1	El Porvenir	11	7	1	1	2005-07-12	2005	0			NEGATIVO	0	0
17915	9	1	El Porvenir	11	7	1	1	2005-07-12	2005	0			NEGATIVO	0	0
17918	9	1	El Porvenir	11	7	1	2	2005-07-12	2005	0			NEGATIVO	0	0
17921	9	1	El Porvenir	11	7	1	2	2005-07-12	2005	0			NEGATIVO	0	0
17904	10	1	El Porvenir	11	7	1	1	2005-07-12	2005	0			NEGATIVO	0	0
17912	10	1	El Porvenir	11	7	1	2	2005-07-12	2005	0			NEGATIVO	0	0
17910	11	1	El Porvenir	11	7	1	2	2005-07-12	2005	0			NEGATIVO	0	0
17911	11	1	El Porvenir	11	7	1	1	2005-07-12	2005	0			NEGATIVO	0	0
17923	11	1	El Porvenir	11	7	1	2	2005-07-12	2005	0			NEGATIVO	0	0
17919	12	1	El Porvenir	11	7	1	2	2005-07-12	2005	0			NEGATIVO	0	0
17922	12	1	El Porvenir	11	7	1	2	2005-07-12	2005	0			NEGATIVO	0	0
17917	13	1	El Porvenir	11	7	1	2	2005-07-12	2005	0			NEGATIVO	0	0
17925	14	1	El Porvenir	11	7	1	2	2005-07-12	2005	0			NEGATIVO	0	0
17920	7	1	El Porvenir	11	7	1	2	2007-11-15	2007	0			NEGATIVO	0	0
17905	10	1	El Porvenir	11	7	1	1	2007-11-15	2007	0			NEGATIVO	0	0
17907	11	1	El Porvenir	11	7	1	1	2007-11-15	2007	0			NEGATIVO	0	0
17914	12	1	El Porvenir	11	7	1	2	2007-11-15	2007	0			NEGATIVO	0	0
17913	9	1	El Porvenir	11	7	1	1	2007-11-16	2007	0			NEGATIVO	0	0
17957	7	1	Timbir�	10	7	1	2	2005-08-17	2005	0			NEGATIVO	0	0
17960	7	1	Timbir�	10	7	1	2	2005-08-17	2005	0			NEGATIVO	0	0
18000	7	1	Timbir�	10	7	1	2	2005-08-17	2005	0			NEGATIVO	0	0
18004	7	1	Timbir�	10	7	1	2	2005-08-17	2005	0			NEGATIVO	0	0
18009	7	1	Timbir�	10	7	1	1	2005-08-17	2005	0			NEGATIVO	0	0
18010	7	1	Timbir�	10	7	1	1	2005-08-17	2005	0			NEGATIVO	0	0
18024	7	1	Timbir�	10	7	1	1	2005-08-17	2005	0			NEGATIVO	0	0
18030	7	1	Timbir�	10	7	1	2	2005-08-17	2005	0			NEGATIVO	0	0
18055	7	1	Timbir�	10	7	1	2	2005-08-17	2005	0			NEGATIVO	0	0
17968	8	1	Timbir�	10	7	1	2	2005-08-17	2005	0			NEGATIVO	0	0
17972	8	1	Timbir�	10	7	1	1	2005-08-17	2005	0			NEGATIVO	0	0
17978	8	1	Timbir�	10	7	1	1	2005-08-17	2005	0			NEGATIVO	0	0
18013	8	1	Timbir�	10	7	1	2	2005-08-17	2005	0			NEGATIVO	0	0
18029	8	1	Timbir�	10	7	1	2	2005-08-17	2005	0			NEGATIVO	0	0
17955	9	1	Timbir�	10	7	1	1	2005-08-17	2005	0			NEGATIVO	0	0
17973	9	1	Timbir�	10	7	1	2	2005-08-17	2005	0			NEGATIVO	0	0
17980	9	1	Timbir�	10	7	1	2	2005-08-17	2005	0			NEGATIVO	0	0
17994	9	1	Timbir�	10	7	1	1	2005-08-17	2005	0			NEGATIVO	0	0
18006	9	1	Timbir�	10	7	1	1	2005-08-17	2005	0			NEGATIVO	0	0
18016	9	1	Timbir�	10	7	1	2	2005-08-17	2005	0			NEGATIVO	0	0
18028	9	1	Timbir�	10	7	1	2	2005-08-17	2005	0			NEGATIVO	0	0
18040	9	1	Timbir�	10	7	1	2	2005-08-17	2005	0			NEGATIVO	0	0
18041	9	1	Timbir�	10	7	1	2	2005-08-17	2005	0			NEGATIVO	0	0
17956	10	1	Timbir�	10	7	1	1	2005-08-17	2005	0			NEGATIVO	0	0
17961	10	1	Timbir�	10	7	1	2	2005-08-17	2005	0			NEGATIVO	0	0
17985	10	1	Timbir�	10	7	1	1	2005-08-17	2005	0			NEGATIVO	0	0
17991	10	1	Timbir�	10	7	1	2	2005-08-17	2005	0			NEGATIVO	0	0
18035	10	1	Timbir�	10	7	1	1	2005-08-17	2005	0			NEGATIVO	0	0
17962	11	1	Timbir�	10	7	1	2	2005-08-17	2005	0			NEGATIVO	0	0
17967	11	1	Timbir�	10	7	1	1	2005-08-17	2005	0			NEGATIVO	0	0
17979	11	1	Timbir�	10	7	1	2	2005-08-17	2005	0			NEGATIVO	0	0
17997	11	1	Timbir�	10	7	1	2	2005-08-17	2005	0			NEGATIVO	0	0
18005	11	1	Timbir�	10	7	1	1	2005-08-17	2005	0			NEGATIVO	0	0
18008	11	1	Timbir�	10	7	1	1	2005-08-17	2005	0			NEGATIVO	0	0
18020	11	1	Timbir�	10	7	1	1	2005-08-17	2005	0			NEGATIVO	0	0
18034	11	1	Timbir�	10	7	1	1	2005-08-17	2005	0			NEGATIVO	0	0
18058	11	1	Timbir�	10	7	1	1	2005-08-17	2005	0			NEGATIVO	0	0
18022	12	1	Timbir�	10	7	1	2	2005-08-17	2005	0			NEGATIVO	0	0
17970	13	1	Timbir�	10	7	1	1	2005-08-17	2005	0			NEGATIVO	0	0
17981	13	1	Timbir�	10	7	1	1	2005-08-17	2005	0			NEGATIVO	0	0
18003	13	1	Timbir�	10	7	1	1	2005-08-17	2005	0			NEGATIVO	0	0
18027	13	1	Timbir�	10	7	1	2	2005-08-17	2005	0			NEGATIVO	0	0
18051	13	1	Timbir�	10	7	1	1	2005-08-17	2005	0			NEGATIVO	0	0
18023	14	1	Timbir�	10	7	1	2	2005-08-17	2005	0			NEGATIVO	0	0
18033	14	1	Timbir�	10	7	1	1	2005-08-17	2005	0			NEGATIVO	0	0
18039	14	1	Timbir�	10	7	1	1	2005-08-17	2005	0			NEGATIVO	0	0
18056	14	1	Timbir�	10	7	1	1	2005-08-17	2005	0			NEGATIVO	0	0
17971	15	1	Timbir�	10	7	1	1	2005-08-17	2005	0			NEGATIVO	0	0
17982	15	1	Timbir�	10	7	1	1	2005-08-17	2005	0			NEGATIVO	0	0
18026	15	1	Timbir�	10	7	1	1	2005-08-17	2005	0			NEGATIVO	0	0
18048	15	1	Timbir�	10	7	1	1	2005-08-17	2005	0			NEGATIVO	0	0
18032	7	1	Timbir�	10	7	1	1	2005-08-18	2005	0			NEGATIVO	0	0
18049	7	1	Timbir�	10	7	1	2	2005-08-18	2005	0			NEGATIVO	0	0
18062	7	1	Timbir�	10	7	1	2	2005-08-18	2005	0			NEGATIVO	0	0
17958	8	1	Timbir�	10	7	1	1	2005-08-18	2005	0			NEGATIVO	0	0
17969	8	1	Timbir�	10	7	1	1	2005-08-18	2005	0			NEGATIVO	0	0
18060	8	1	Timbir�	10	7	1	2	2005-08-18	2005	0			NEGATIVO	0	0
18061	8	1	Timbir�	10	7	1	1	2005-08-18	2005	0			NEGATIVO	0	0
17959	9	1	Timbir�	10	7	1	2	2005-08-18	2005	0			NEGATIVO	0	0
17966	10	1	Timbir�	10	7	1	1	2005-08-18	2005	0			NEGATIVO	0	0
18050	10	1	Timbir�	10	7	1	2	2005-08-18	2005	0			NEGATIVO	0	0
17977	13	1	Timbir�	10	7	1	1	2005-08-18	2005	0			NEGATIVO	0	0
18064	13	1	Timbir�	10	7	1	2	2005-08-18	2005	0			NEGATIVO	0	0
18007	14	1	Timbir�	10	7	1	2	2005-08-18	2005	0			NEGATIVO	0	0
18018	14	1	Timbir�	10	7	1	1	2005-08-18	2005	0			NEGATIVO	0	0
17963	15	1	Timbir�	10	7	1	2	2005-08-18	2005	0			NEGATIVO	0	0
17964	15	1	Timbir�	10	7	1	1	2005-08-18	2005	0			NEGATIVO	0	0
18065	15	1	Timbir�	10	7	1	1	2005-08-18	2005	0			NEGATIVO	0	0
18038	15	1	Timbir�	10	7	1	1	2005-08-18	2005	0			NEGATIVO	0	0
18042	8	1	Timbir�	10	7	1	2	2005-08-19	2005	0			NEGATIVO	0	0
18031	9	1	Timbir�	10	7	1	2	2005-08-19	2005	0			NEGATIVO	0	0
17975	12	1	Timbir�	10	7	1	2	2005-08-19	2005	0			NEGATIVO	0	0
18043	12	1	Timbir�	10	7	1	1	2005-08-19	2005	0			NEGATIVO	0	0
18001	13	1	Timbir�	10	7	1	1	2005-08-19	2005	0			NEGATIVO	0	0
18057	13	1	Timbir�	10	7	1	2	2005-08-19	2005	0			NEGATIVO	0	0
18011	15	1	Timbir�	10	7	1	1	2005-08-19	2005	0			NEGATIVO	0	0
17988	12	1	Timbir�	10	7	1	2	2005-08-20	2005	0			NEGATIVO	0	0
18046	12	1	Timbir�	10	7	1	2	2005-08-21	2005	0			NEGATIVO	0	0
18045	13	1	Timbir�	10	7	1	1	2005-08-21	2005	0			NEGATIVO	0	0
18044	14	1	Timbir�	10	7	1	1	2005-08-21	2005	0			NEGATIVO	0	0
18066	10	1	Timbir�	10	7	1	1	2005-09-03	2005	0			NEGATIVO	0	0
18068	12	1	Timbir�	10	7	1	2	2005-09-05	2005	0			NEGATIVO	0	0
18067	7	1	Timbir�	10	7	1	1	2005-09-06	2005	0			NEGATIVO	0	0
18161	7	1	Timbir�	10	7	1	2	2005-09-06	2005	0			NEGATIVO	0	0
18059	7	1	Timbir�	10	7	1	2	2007-01-05	2007	0			NEGATIVO	0	0
18015	7	1	Timbir�	10	7	1	2	2007-11-05	2007	0			NEGATIVO	0	0
18047	7	1	Timbir�	10	7	1	1	2007-11-05	2007	0			NEGATIVO	0	0
17974	8	1	Timbir�	10	7	1	1	2007-11-05	2007	0			NEGATIVO	0	0
18012	8	1	Timbir�	10	7	1	1	2007-11-05	2007	0			NEGATIVO	0	0
18017	8	1	Timbir�	10	7	1	1	2007-11-05	2007	0			NEGATIVO	0	0
18025	8	1	Timbir�	10	7	1	2	2007-11-05	2007	0			NEGATIVO	0	0
17976	9	1	Timbir�	10	7	1	1	2007-11-05	2007	0			NEGATIVO	0	0
18019	9	1	Timbir�	10	7	1	1	2007-11-05	2007	0			NEGATIVO	0	0
17995	10	1	Timbir�	10	7	1	2	2007-11-05	2007	1	0	0	NEGATIVO	0	0
17965	11	1	Timbir�	10	7	1	1	2007-11-05	2007	0			NEGATIVO	0	0
18036	14	1	Timbir�	10	7	1	2	2007-11-05	2007	0			NEGATIVO	0	0
18052	14	1	Timbir�	10	7	1	1	2007-11-05	2007	0			NEGATIVO	0	0
17937	7	1	Las Antonias	12	8	1	2	2005-07-14	2005	0			NEGATIVO	0	0
17948	7	1	Las Antonias	12	8	1	2	2005-07-14	2005	0			NEGATIVO	0	0
17950	7	1	Las Antonias	12	8	1	1	2005-07-14	2005	0			NEGATIVO	0	0
17932	8	1	Las Antonias	12	8	1	1	2005-07-14	2005	0			NEGATIVO	0	0
17938	8	1	Las Antonias	12	8	1	2	2005-07-14	2005	0			NEGATIVO	0	0
17941	8	1	Las Antonias	12	8	1	1	2005-07-14	2005	0			NEGATIVO	0	0
17935	9	1	Las Antonias	12	8	1	1	2005-07-14	2005	0			NEGATIVO	0	0
17944	9	1	Las Antonias	12	8	1	2	2005-07-14	2005	0			NEGATIVO	0	0
17946	9	1	Las Antonias	12	8	1	2	2005-07-14	2005	0			NEGATIVO	0	0
17929	10	1	Las Antonias	12	8	1	2	2005-07-14	2005	0			NEGATIVO	0	0
17930	11	1	Las Antonias	12	8	1	2	2005-07-14	2005	0			NEGATIVO	0	0
17936	11	1	Las Antonias	12	8	1	2	2005-07-14	2005	0			NEGATIVO	0	0
17926	12	1	Las Antonias	12	8	1	1	2005-07-14	2005	0			NEGATIVO	0	0
17942	13	1	Las Antonias	12	8	1	2	2005-07-14	2005	0			NEGATIVO	0	0
17928	14	1	Las Antonias	12	8	1	2	2005-07-14	2005	0			NEGATIVO	0	0
17934	14	1	Las Antonias	12	8	1	1	2005-07-14	2005	0			NEGATIVO	0	0
17951	14	1	Las Antonias	12	8	1	2	2005-07-14	2005	0			NEGATIVO	0	0
17953	14	1	Las Antonias	12	8	1	1	2005-07-14	2005	0			NEGATIVO	0	0
17947	15	1	Las Antonias	12	8	1	1	2005-07-14	2005	0			NEGATIVO	0	0
17952	9	1	Las Antonias	12	8	1	1	2005-07-16	2005	0			NEGATIVO	0	0
17954	14	1	Las Antonias	12	8	1	1	2005-07-16	2005	0			NEGATIVO	0	0
17945	7	1	Las Antonias	12	8	1	1	2007-11-15	2007	0			NEGATIVO	0	0
17933	8	1	Las Antonias	12	8	1	1	2007-11-15	2007	0			NEGATIVO	0	0
17939	8	1	Las Antonias	12	8	1	2	2007-11-15	2007	0			NEGATIVO	0	0
17940	9	1	Las Antonias	12	8	1	1	2007-11-15	2007	0			NEGATIVO	0	0
17931	11	1	Las Antonias	12	8	1	1	2007-11-15	2007	0			NEGATIVO	0	0
17927	8	1	Las Antonias	12	8	1	1	2007-11-16	2007	0			NEGATIVO	0	0
18779	6	1	Rocafuerte	13	9	1	2	2005-12-11	2005	0			NEGATIVO	0	0
18758	7	1	Rocafuerte	13	9	1	1	2005-12-11	2005	0			NEGATIVO	0	0
18763	7	1	Rocafuerte	13	9	1	2	2005-12-11	2005	0			NEGATIVO	0	0
18764	8	1	Rocafuerte	13	9	1	2	2005-12-11	2005	0			NEGATIVO	0	0
18767	8	1	Rocafuerte	13	9	1	1	2005-12-11	2005	0			NEGATIVO	0	0
18769	8	1	Rocafuerte	13	9	1	2	2005-12-11	2005	0			NEGATIVO	0	0
18774	8	1	Rocafuerte	13	9	1	1	2005-12-11	2005	0			NEGATIVO	0	0
18778	8	1	Rocafuerte	13	9	1	2	2005-12-11	2005	0			NEGATIVO	0	0
18751	9	1	Rocafuerte	13	9	1	1	2005-12-11	2005	0			NEGATIVO	0	0
18754	9	1	Rocafuerte	13	9	1	2	2005-12-11	2005	0			NEGATIVO	0	0
18760	9	1	Rocafuerte	13	9	1	1	2005-12-11	2005	0			NEGATIVO	0	0
18768	9	1	Rocafuerte	13	9	1	2	2005-12-11	2005	0			NEGATIVO	0	0
18755	10	1	Rocafuerte	13	9	1	2	2005-12-11	2005	0			NEGATIVO	0	0
18759	10	1	Rocafuerte	13	9	1	2	2005-12-11	2005	0			NEGATIVO	0	0
18766	10	1	Rocafuerte	13	9	1	2	2005-12-11	2005	0			NEGATIVO	0	0
18756	11	1	Rocafuerte	13	9	1	1	2005-12-11	2005	0			NEGATIVO	0	0
18771	11	1	Rocafuerte	13	9	1	2	2005-12-11	2005	0			NEGATIVO	0	0
18786	11	1	Rocafuerte	13	9	1	2	2005-12-11	2005	0			NEGATIVO	0	0
18752	12	1	Rocafuerte	13	9	1	1	2005-12-11	2005	0			NEGATIVO	0	0
18761	12	1	Rocafuerte	13	9	1	1	2005-12-11	2005	0			NEGATIVO	0	0
18757	13	1	Rocafuerte	13	9	1	1	2005-12-11	2005	0			NEGATIVO	0	0
18762	13	1	Rocafuerte	13	9	1	2	2005-12-11	2005	0			NEGATIVO	0	0
18775	13	1	Rocafuerte	13	9	1	2	2005-12-11	2005	0			NEGATIVO	0	0
18776	13	1	Rocafuerte	13	9	1	2	2005-12-11	2005	0			NEGATIVO	0	0
18787	13	1	Rocafuerte	13	9	1	2	2005-12-11	2005	0			NEGATIVO	0	0
18782	13	1	Rocafuerte	13	9	1	2	2005-12-13	2005	0			NEGATIVO	0	0
18784	6	1	Rocafuerte	13	9	1	2	2008-02-15	2008	0			NEGATIVO	0	0
18765	12	1	Rocafuerte	13	9	1	1	2008-07-20	2008	0			NEGATIVO	0	0
18785	12	1	Rocafuerte	13	9	1	1	2008-07-20	2008	0			NEGATIVO	0	0
18777	8	1	Rocafuerte	13	9	1	1	2008-07-21	2008	0			NEGATIVO	0	0
18753	9	1	Rocafuerte	13	9	1	1	2008-07-22	2008	0			NEGATIVO	0	0
17501	7	1	San Miguel	15	10	1	1	2005-03-14	2005	0			NEGATIVO	0	0
17508	7	2	San Miguel	15	10	1	2	2005-03-14	2005	0			NEGATIVO	0	0
17492	8	1	San Miguel	15	10	1	2	2005-03-14	2005	0			NEGATIVO	0	0
17494	8	1	San Miguel	15	10	1	1	2005-03-14	2005	0			NEGATIVO	0	0
17499	9	1	San Miguel	15	10	1	2	2005-03-14	2005	0			NEGATIVO	0	0
17491	10	1	San Miguel	15	10	1	1	2005-03-14	2005	0			NEGATIVO	0	0
17504	10	1	San Miguel	15	10	1	2	2005-03-14	2005	0			NEGATIVO	0	0
17506	11	1	San Miguel	15	10	1	1	2005-03-14	2005	0			NEGATIVO	0	0
17505	12	1	San Miguel	15	10	1	2	2005-03-14	2005	0			NEGATIVO	0	0
17490	13	1	San Miguel	15	10	1	2	2005-03-14	2005	0			NEGATIVO	0	0
17493	13	1	San Miguel	15	10	1	2	2005-03-14	2005	0			NEGATIVO	0	0
17507	13	1	San Miguel	15	10	1	2	2005-03-14	2005	0			NEGATIVO	0	0
17488	14	1	San Miguel	15	10	1	1	2005-03-14	2005	0			NEGATIVO	0	0
17502	14	1	San Miguel	15	10	1	1	2005-03-14	2005	0			NEGATIVO	0	0
17495	15	1	San Miguel	15	10	1	2	2005-03-14	2005	0			NEGATIVO	0	0
17510	7	1	San Miguel	15	10	1	2	2005-03-15	2005	0			NEGATIVO	0	0
17513	7	1	San Miguel	15	10	1	1	2005-03-15	2005	0			NEGATIVO	0	0
17518	7	1	San Miguel	15	10	1	1	2005-03-15	2005	0			NEGATIVO	0	0
17517	13	1	San Miguel	15	10	1	2	2005-03-15	2005	0			NEGATIVO	0	0
17516	14	1	San Miguel	15	10	1	2	2005-03-15	2005	0			NEGATIVO	0	0
17519	14	1	San Miguel	15	10	1	2	2005-03-15	2005	0			NEGATIVO	0	0
17520	7	1	San Miguel	15	10	1	1	2005-03-16	2005	0			NEGATIVO	0	0
17521	15	1	San Miguel	15	10	1	1	2009-01-17	2009	0			NEGATIVO	0	0
17514	7	1	San Miguel	15	10	1	1	2009-01-19	2009	0			NEGATIVO	0	0
17497	8	1	San Miguel	15	10	1	1	2009-01-19	2009	0			NEGATIVO	0	0
17503	9	1	San Miguel	15	10	1	2	2009-01-19	2009	0			NEGATIVO	0	0
17500	10	1	San Miguel	15	10	1	1	2009-01-19	2009	0			NEGATIVO	0	0
17511	11	2	San Miguel	15	10	1	2	2009-01-19	2009	0			NEGATIVO	0	0
17515	11	1	San Miguel	15	10	1	1	2009-01-19	2009	0			NEGATIVO	0	0
17486	12	1	San Miguel	15	10	1	2	2009-01-19	2009	0			NEGATIVO	0	0
17489	12	1	San Miguel	15	10	1	1	2009-01-19	2009	0			NEGATIVO	0	0
17498	12	1	San Miguel	15	10	1	2	2009-01-19	2009	0			NEGATIVO	0	0
17487	13	1	San Miguel	15	10	1	1	2009-01-19	2009	0			NEGATIVO	0	0
17524	7	1	Majua	16	11	1	1	2005-03-17	2005	0			NEGATIVO	0	0
17526	7	1	Majua	16	11	1	1	2005-03-17	2005	0			NEGATIVO	0	0
17535	7	1	Majua	16	11	1	2	2005-03-17	2005	0			NEGATIVO	0	0
17529	8	1	Majua	16	11	1	1	2005-03-17	2005	0			NEGATIVO	0	0
17531	8	1	Majua	16	11	1	1	2005-03-17	2005	0			NEGATIVO	0	0
17534	9	1	Majua	16	11	1	2	2005-03-17	2005	0			NEGATIVO	0	0
17528	10	1	Majua	16	11	1	1	2005-03-17	2005	0			NEGATIVO	0	0
17532	10	1	Majua	16	11	1	1	2005-03-17	2005	0			NEGATIVO	0	0
17527	12	1	Majua	16	11	1	2	2005-03-17	2005	0			NEGATIVO	0	0
17523	13	1	Majua	16	11	1	2	2005-03-17	2005	0			NEGATIVO	0	0
17525	15	1	Majua	16	11	1	2	2005-03-17	2005	0			NEGATIVO	0	0
19223	8	3	Majua	16	11	1	1	2006-03-16	2006	0			NEGATIVO	0	0
17522	12	1	Majua	16	11	1	2	2009-01-12	2009	0			NEGATIVO	0	0
17530	7	1	Majua	16	11	1	2	2009-01-19	2009	0			NEGATIVO	0	0
17533	12	1	Majua	16	11	1	1	2009-01-19	2009	0			NEGATIVO	0	0
19143	7	1	Zapallo Grande	17	12	1	1	2006-03-15	2006	0			NEGATIVO	0	0
19151	7	1	Zapallo Grande	17	12	1	2	2006-03-15	2006	0			NEGATIVO	0	0
19164	7	1	Zapallo Grande	17	12	1	1	2006-03-15	2006	0			NEGATIVO	0	0
19176	7	1	Zapallo Grande	17	12	1	2	2006-03-15	2006	0			NEGATIVO	0	0
19165	8	1	Zapallo Grande	17	12	1	1	2006-03-15	2006	0			NEGATIVO	0	0
19208	8	1	Zapallo Grande	17	12	1	2	2006-03-15	2006	0			NEGATIVO	0	0
19202	9	1	Zapallo Grande	17	12	1	1	2006-03-15	2006	0			NEGATIVO	0	0
19212	9	1	Zapallo Grande	17	12	1	2	2006-03-15	2006	0			NEGATIVO	0	0
19141	11	1	Zapallo Grande	17	12	1	2	2006-03-15	2006	0			NEGATIVO	0	0
19161	11	1	Zapallo Grande	17	12	1	1	2006-03-15	2006	0			NEGATIVO	0	0
19206	11	1	Zapallo Grande	17	12	1	1	2006-03-15	2006	0			NEGATIVO	0	0
19152	12	1	Zapallo Grande	17	12	1	1	2006-03-15	2006	0			NEGATIVO	0	0
19154	12	1	Zapallo Grande	17	12	1	2	2006-03-15	2006	0			NEGATIVO	0	0
19163	12	1	Zapallo Grande	17	12	1	2	2006-03-15	2006	0			NEGATIVO	0	0
19182	12	1	Zapallo Grande	17	12	1	2	2006-03-15	2006	0			NEGATIVO	0	0
19192	12	1	Zapallo Grande	17	12	1	1	2006-03-15	2006	0			NEGATIVO	0	0
19156	13	1	Zapallo Grande	17	12	1	1	2006-03-15	2006	0			NEGATIVO	0	0
19177	13	1	Zapallo Grande	17	12	1	1	2006-03-15	2006	0			NEGATIVO	0	0
19207	13	1	Zapallo Grande	17	12	1	1	2006-03-15	2006	0			NEGATIVO	0	0
19153	14	1	Zapallo Grande	17	12	1	1	2006-03-15	2006	0			NEGATIVO	0	0
19155	14	1	Zapallo Grande	17	12	1	1	2006-03-15	2006	0			NEGATIVO	0	0
19157	15	1	Zapallo Grande	17	12	1	1	2006-03-15	2006	0			NEGATIVO	0	0
19162	15	1	Zapallo Grande	17	12	1	2	2006-03-15	2006	0			NEGATIVO	0	0
19173	15	1	Zapallo Grande	17	12	1	1	2006-03-15	2006	0			NEGATIVO	0	0
19175	15	3	Zapallo Grande	17	12	1	1	2006-03-15	2006	0			NEGATIVO	0	0
19181	15	1	Zapallo Grande	17	12	1	1	2006-03-15	2006	0			NEGATIVO	0	0
19178	7	1	Zapallo Grande	17	12	1	2	2006-03-16	2006	0			NEGATIVO	0	0
19187	7	1	Zapallo Grande	17	12	1	1	2006-03-16	2006	0			NEGATIVO	0	0
19184	8	1	Zapallo Grande	17	12	1	1	2006-03-16	2006	0			NEGATIVO	0	0
19185	8	1	Zapallo Grande	17	12	1	2	2006-03-16	2006	0			NEGATIVO	0	0
19166	10	1	Zapallo Grande	17	12	1	2	2006-03-16	2006	0			NEGATIVO	0	0
19186	10	1	Zapallo Grande	17	12	1	2	2006-03-16	2006	0			NEGATIVO	0	0
19219	10	1	Zapallo Grande	17	12	1	1	2006-03-16	2006	0			NEGATIVO	0	0
19224	10	1	Zapallo Grande	17	12	1	2	2006-03-16	2006	0			NEGATIVO	0	0
19193	11	1	Zapallo Grande	17	12	1	1	2006-03-16	2006	0			NEGATIVO	0	0
19194	11	3	Zapallo Grande	17	12	1	1	2006-03-16	2006	0			NEGATIVO	0	0
19215	12	1	Zapallo Grande	17	12	1	2	2006-03-16	2006	0			NEGATIVO	0	0
19203	13	1	Zapallo Grande	17	12	1	1	2006-03-16	2006	0			NEGATIVO	0	0
19221	13	3	Zapallo Grande	17	12	1	1	2006-03-16	2006	0			NEGATIVO	0	0
19222	13	3	Zapallo Grande	17	12	1	1	2006-03-16	2006	0			NEGATIVO	0	0
19188	14	1	Zapallo Grande	17	12	1	1	2006-03-16	2006	0			NEGATIVO	0	0
19195	14	3	Zapallo Grande	17	12	1	1	2006-03-16	2006	0			NEGATIVO	0	0
19218	15	3	Zapallo Grande	17	12	1	2	2006-03-16	2006	0			NEGATIVO	0	0
19179	7	3	Zapallo Grande	17	12	1	1	2006-03-17	2006	0			NEGATIVO	0	0
19234	7	3	Zapallo Grande	17	12	1	1	2006-03-17	2006	0			NEGATIVO	0	0
19227	10	3	Zapallo Grande	17	12	1	2	2006-03-17	2006	0			NEGATIVO	0	0
19229	11	1	Zapallo Grande	17	12	1	1	2006-03-17	2006	0			NEGATIVO	0	0
19231	11	3	Zapallo Grande	17	12	1	2	2006-03-17	2006	0			NEGATIVO	0	0
19159	12	1	Zapallo Grande	17	12	1	1	2006-03-17	2006	0			NEGATIVO	0	0
19230	12	3	Zapallo Grande	17	12	1	2	2006-03-17	2006	0			NEGATIVO	0	0
19232	12	3	Zapallo Grande	17	12	1	1	2006-03-17	2006	0			NEGATIVO	0	0
19235	13	3	Zapallo Grande	17	12	1	1	2006-03-17	2006	0			NEGATIVO	0	0
19228	14	3	Zapallo Grande	17	12	1	1	2006-03-17	2006	0			NEGATIVO	0	0
19225	15	1	Zapallo Grande	17	12	1	2	2006-03-17	2006	0			NEGATIVO	0	0
19226	15	1	Zapallo Grande	17	12	1	2	2006-03-17	2006	0			NEGATIVO	0	0
19243	8	3	Zapallo Grande	17	12	1	2	2006-03-18	2006	0			NEGATIVO	0	0
19239	9	3	Zapallo Grande	17	12	1	1	2006-03-18	2006	0			NEGATIVO	0	0
19245	10	3	Zapallo Grande	17	12	1	1	2006-03-18	2006	0			NEGATIVO	0	0
19246	10	3	Zapallo Grande	17	12	1	2	2006-03-18	2006	0			NEGATIVO	0	0
19213	11	1	Zapallo Grande	17	12	1	1	2006-03-18	2006	0			NEGATIVO	0	0
19240	12	3	Zapallo Grande	17	12	1	2	2006-03-18	2006	0			NEGATIVO	0	0
19242	12	3	Zapallo Grande	17	12	1	2	2006-03-18	2006	0			NEGATIVO	0	0
19248	12	3	Zapallo Grande	17	12	1	1	2006-03-18	2006	0			NEGATIVO	0	0
19244	13	3	Zapallo Grande	17	12	1	1	2006-03-18	2006	0			NEGATIVO	0	0
19241	14	3	Zapallo Grande	17	12	1	2	2006-03-18	2006	0			NEGATIVO	0	0
19238	15	3	Zapallo Grande	17	12	1	2	2006-03-18	2006	0			NEGATIVO	0	0
19249	11	3	Zapallo Grande	17	12	1	2	2006-03-19	2006	0			NEGATIVO	0	0
19253	13	3	Zapallo Grande	17	12	1	1	2006-03-19	2006	0			NEGATIVO	0	0
19252	15	3	Zapallo Grande	17	12	1	2	2006-03-19	2006	0			NEGATIVO	0	0
19250	15	3	Zapallo Grande	17	12	1	2	2006-05-19	2006	0			NEGATIVO	0	0
19183	11	1	Zapallo Grande	17	12	1	2	2008-01-18	2008	0			NEGATIVO	0	0
19216	10	1	Zapallo Grande	17	12	1	2	2009-01-17	2009	0			NEGATIVO	0	0
19217	10	1	Zapallo Grande	17	12	1	1	2009-01-17	2009	0			NEGATIVO	0	0
19142	9	1	Zapallo Grande	17	12	1	2	2009-01-18	2009	0			NEGATIVO	0	0
19174	12	1	Zapallo Grande	17	12	1	1	2009-01-18	2009	0			NEGATIVO	0	0
19160	13	1	Zapallo Grande	17	12	1	2	2009-01-18	2009	0			NEGATIVO	0	0
19251	13	3	Zapallo Grande	17	12	1	2	2009-01-18	2009	0			NEGATIVO	0	0
19233	14	3	Zapallo Grande	17	12	1	1	2009-01-18	2009	0			NEGATIVO	0	0
17403	7	1	Telemb�	18	13	1	1	2005-03-11	2005	0			NEGATIVO	0	0
17404	7	1	Telemb�	18	13	1	1	2005-03-11	2005	0			NEGATIVO	0	0
17405	7	1	Telemb�	18	13	1	1	2005-03-11	2005	0			NEGATIVO	0	0
17406	7	1	Telemb�	18	13	1	2	2005-03-11	2005	0			NEGATIVO	0	0
17407	7	1	Telemb�	18	13	1	2	2005-03-11	2005	0			NEGATIVO	0	0
17409	7	1	Telemb�	18	13	1	1	2005-03-11	2005	0			NEGATIVO	0	0
17410	7	1	Telemb�	18	13	1	1	2005-03-11	2005	0			NEGATIVO	0	0
17413	7	1	Telemb�	18	13	1	2	2005-03-11	2005	0			NEGATIVO	0	0
17418	7	1	Telemb�	18	13	1	2	2005-03-11	2005	0			NEGATIVO	0	0
17420	7	1	Telemb�	18	13	1	1	2005-03-11	2005	0			NEGATIVO	0	0
17428	7	1	Telemb�	18	13	1	2	2005-03-11	2005	0			NEGATIVO	0	0
17447	7	1	Telemb�	18	13	1	1	2005-03-11	2005	0			NEGATIVO	0	0
17402	8	1	Telemb�	18	13	1	2	2005-03-11	2005	0			NEGATIVO	0	0
17430	8	1	Telemb�	18	13	1	2	2005-03-11	2005	0			NEGATIVO	0	0
17431	8	1	Telemb�	18	13	1	2	2005-03-11	2005	0			NEGATIVO	0	0
17443	8	1	Telemb�	18	13	1	1	2005-03-11	2005	0			NEGATIVO	0	0
17437	9	1	Telemb�	18	13	1	2	2005-03-11	2005	0			NEGATIVO	0	0
17441	9	1	Telemb�	18	13	1	2	2005-03-11	2005	0			NEGATIVO	0	0
17452	9	1	Telemb�	18	13	1	1	2005-03-11	2005	0			NEGATIVO	0	0
17414	10	1	Telemb�	18	13	1	1	2005-03-11	2005	0			NEGATIVO	0	0
17451	10	1	Telemb�	18	13	1	1	2005-03-11	2005	0			NEGATIVO	0	0
17458	10	1	Telemb�	18	13	1	1	2005-03-11	2005	0			NEGATIVO	0	0
17423	11	1	Telemb�	18	13	1	1	2005-03-11	2005	0			NEGATIVO	0	0
17432	11	1	Telemb�	18	13	1	2	2005-03-11	2005	0			NEGATIVO	0	0
17446	11	1	Telemb�	18	13	1	2	2005-03-11	2005	0			NEGATIVO	0	0
17453	11	1	Telemb�	18	13	1	1	2005-03-11	2005	0			NEGATIVO	0	0
17417	12	1	Telemb�	18	13	1	2	2005-03-11	2005	0			NEGATIVO	0	0
17436	12	1	Telemb�	18	13	1	2	2005-03-11	2005	0			NEGATIVO	0	0
17438	12	1	Telemb�	18	13	1	2	2005-03-11	2005	0			NEGATIVO	0	0
17445	12	1	Telemb�	18	13	1	1	2005-03-11	2005	0			NEGATIVO	0	0
17448	12	1	Telemb�	18	13	1	2	2005-03-11	2005	0			NEGATIVO	0	0
17433	13	1	Telemb�	18	13	1	1	2005-03-11	2005	0			NEGATIVO	0	0
17434	13	1	Telemb�	18	13	1	1	2005-03-11	2005	0			NEGATIVO	0	0
17440	13	1	Telemb�	18	13	1	1	2005-03-11	2005	0			NEGATIVO	0	0
17415	14	1	Telemb�	18	13	1	1	2005-03-11	2005	0			NEGATIVO	0	0
17421	14	1	Telemb�	18	13	1	2	2005-03-11	2005	0			NEGATIVO	0	0
17435	14	1	Telemb�	18	13	1	2	2005-03-11	2005	0			NEGATIVO	0	0
17400	15	1	Telemb�	18	13	1	1	2005-03-11	2005	0			NEGATIVO	0	0
17408	15	1	Telemb�	18	13	1	1	2005-03-11	2005	0			NEGATIVO	0	0
17411	15	1	Telemb�	18	13	1	1	2005-03-11	2005	0			NEGATIVO	0	0
17419	15	1	Telemb�	18	13	1	1	2005-03-11	2005	0			NEGATIVO	0	0
17425	15	1	Telemb�	18	13	1	1	2005-03-11	2005	0			NEGATIVO	0	0
17444	15	1	Telemb�	18	13	1	1	2005-03-11	2005	0			NEGATIVO	0	0
17466	9	1	Telemb�	18	13	1	2	2005-03-12	2005	0			NEGATIVO	0	0
17470	9	1	Telemb�	18	13	1	2	2005-03-12	2005	0			NEGATIVO	0	0
17471	9	1	Telemb�	18	13	1	1	2005-03-12	2005	0			NEGATIVO	0	0
17473	9	1	Telemb�	18	13	1	1	2005-03-12	2005	0			NEGATIVO	0	0
17477	9	1	Telemb�	18	13	1	1	2005-03-12	2005	0			NEGATIVO	0	0
17450	11	1	Telemb�	18	13	1	1	2005-03-12	2005	0			NEGATIVO	0	0
17459	11	1	Telemb�	18	13	1	1	2005-03-12	2005	0			NEGATIVO	0	0
17462	11	1	Telemb�	18	13	1	2	2005-03-12	2005	0			NEGATIVO	0	0
17465	11	1	Telemb�	18	13	1	2	2005-03-12	2005	0			NEGATIVO	0	0
17472	11	1	Telemb�	18	13	1	1	2005-03-12	2005	0			NEGATIVO	0	0
17476	11	1	Telemb�	18	13	1	1	2005-03-12	2005	0			NEGATIVO	0	0
17460	13	1	Telemb�	18	13	1	1	2005-03-12	2005	0			NEGATIVO	0	0
17469	14	1	Telemb�	18	13	1	1	2005-03-12	2005	0			NEGATIVO	0	0
17480	9	1	Telemb�	18	13	1	1	2005-03-13	2005	0			NEGATIVO	0	0
17484	10	1	Telemb�	18	13	1	1	2005-03-13	2005	0			NEGATIVO	0	0
17481	11	1	Telemb�	18	13	1	2	2005-03-13	2005	0			NEGATIVO	0	0
17485	13	1	Telemb�	18	13	1	2	2005-03-13	2005	0			NEGATIVO	0	0
17479	14	1	Telemb�	18	13	1	2	2005-03-13	2005	0			NEGATIVO	0	0
17482	14	1	Telemb�	18	13	1	2	2005-03-13	2005	0			NEGATIVO	0	0
17478	15	1	Telemb�	18	13	1	1	2005-03-13	2005	0			NEGATIVO	0	0
17475	10	1	Telemb�	18	13	1	1	2005-04-12	2005	0			NEGATIVO	0	0
17455	13	1	Telemb�	18	13	1	1	2005-05-11	2005	0			NEGATIVO	0	0
17449	10	1	Telemb�	18	13	1	1	2008-02-07	2008	0			NEGATIVO	0	0
17429	7	1	Telemb�	18	13	1	2	2009-02-07	2009	0			NEGATIVO	0	0
17454	7	1	Telemb�	18	13	1	2	2009-02-07	2009	0			NEGATIVO	0	0
17439	11	1	Telemb�	18	13	1	2	2009-02-07	2009	0			NEGATIVO	0	0
17483	12	1	Telemb�	18	13	1	1	2009-02-10	2009	0			NEGATIVO	0	0
17468	12	1	Telemb�	18	13	1	1	2009-02-17	2009	0			NEGATIVO	0	0
17401	7	1	Telemb�	18	13	1	2	2009-03-15	2009	0			NEGATIVO	0	0
17416	10	1	Telemb�	18	13	1	2	2009-03-15	2009	0			NEGATIVO	0	0
17457	12	1	Telemb�	18	13	1	2	2009-03-15	2009	0			NEGATIVO	0	0
19044	7	1	Boca Zapallito	14	14	1	1	2006-03-07	2006	0			NEGATIVO	0	0
19052	7	1	Boca Zapallito	14	14	1	2	2006-03-07	2006	0			NEGATIVO	0	0
19069	7	1	Boca Zapallito	14	14	1	2	2006-03-07	2006	0			NEGATIVO	0	0
19073	7	3	Boca Zapallito	14	14	1	2	2006-03-07	2006	0			NEGATIVO	0	0
19079	7	1	Boca Zapallito	14	14	1	1	2006-03-07	2006	0			NEGATIVO	0	0
19049	8	1	Boca Zapallito	14	14	1	2	2006-03-07	2006	0			NEGATIVO	0	0
19055	8	1	Boca Zapallito	14	14	1	2	2006-03-07	2006	0			NEGATIVO	0	0
19061	8	1	Boca Zapallito	14	14	1	2	2006-03-07	2006	0			NEGATIVO	0	0
19063	8	1	Boca Zapallito	14	14	1	1	2006-03-07	2006	0			NEGATIVO	0	0
19074	8	3	Boca Zapallito	14	14	1	1	2006-03-07	2006	0			NEGATIVO	0	0
19078	8	1	Boca Zapallito	14	14	1	1	2006-03-07	2006	0			NEGATIVO	0	0
19057	9	1	Boca Zapallito	14	14	1	2	2006-03-07	2006	0			NEGATIVO	0	0
19062	9	1	Boca Zapallito	14	14	1	1	2006-03-07	2006	0			NEGATIVO	0	0
19066	9	1	Boca Zapallito	14	14	1	2	2006-03-07	2006	0			NEGATIVO	0	0
19075	9	3	Boca Zapallito	14	14	1	1	2006-03-07	2006	0			NEGATIVO	0	0
19040	10	1	Boca Zapallito	14	14	1	2	2006-03-07	2006	0			NEGATIVO	0	0
19056	10	1	Boca Zapallito	14	14	1	1	2006-03-07	2006	0			NEGATIVO	0	0
19060	10	1	Boca Zapallito	14	14	1	2	2006-03-07	2006	0			NEGATIVO	0	0
19071	10	3	Boca Zapallito	14	14	1	2	2006-03-07	2006	0			NEGATIVO	0	0
19058	11	1	Boca Zapallito	14	14	1	2	2006-03-07	2006	0			NEGATIVO	0	0
19059	11	1	Boca Zapallito	14	14	1	1	2006-03-07	2006	0			NEGATIVO	0	0
19067	11	1	Boca Zapallito	14	14	1	2	2006-03-07	2006	0			NEGATIVO	0	0
19072	11	3	Boca Zapallito	14	14	1	2	2006-03-07	2006	0			NEGATIVO	0	0
19076	11	3	Boca Zapallito	14	14	1	1	2006-03-07	2006	0			NEGATIVO	0	0
19043	12	1	Boca Zapallito	14	14	1	2	2006-03-07	2006	0			NEGATIVO	0	0
19050	12	1	Boca Zapallito	14	14	1	1	2006-03-07	2006	0			NEGATIVO	0	0
19070	12	3	Boca Zapallito	14	14	1	1	2006-03-07	2006	0			NEGATIVO	0	0
19077	12	3	Boca Zapallito	14	14	1	1	2006-03-07	2006	0			NEGATIVO	0	0
19045	13	1	Boca Zapallito	14	14	1	1	2006-03-07	2006	0			NEGATIVO	0	0
19048	13	1	Boca Zapallito	14	14	1	1	2006-03-07	2006	0			NEGATIVO	0	0
19054	13	1	Boca Zapallito	14	14	1	1	2006-03-07	2006	0			NEGATIVO	0	0
19041	14	1	Boca Zapallito	14	14	1	1	2006-03-07	2006	0			NEGATIVO	0	0
19047	14	1	Boca Zapallito	14	14	1	1	2006-03-07	2006	0			NEGATIVO	0	0
19064	14	3	Boca Zapallito	14	14	1	1	2006-03-07	2006	0			NEGATIVO	0	0
19065	14	1	Boca Zapallito	14	14	1	2	2006-03-07	2006	0			NEGATIVO	0	0
19068	14	1	Boca Zapallito	14	14	1	1	2006-03-07	2006	0			NEGATIVO	0	0
19042	15	1	Boca Zapallito	14	14	1	1	2006-03-07	2006	0			NEGATIVO	0	0
19046	15	1	Boca Zapallito	14	14	1	1	2006-03-07	2006	0			NEGATIVO	0	0
19051	15	1	Boca Zapallito	14	14	1	2	2006-03-07	2006	0			NEGATIVO	0	0
19053	15	1	Boca Zapallito	14	14	1	1	2006-03-07	2006	0			NEGATIVO	0	0
19080	15	1	Boca Zapallito	14	14	1	1	2006-03-07	2006	0			NEGATIVO	0	0
19083	7	1	Boca Zapallito	14	14	1	2	2006-03-08	2006	0			NEGATIVO	0	0
19084	9	1	Boca Zapallito	14	14	1	1	2006-03-08	2006	0			NEGATIVO	0	0
19081	10	1	Boca Zapallito	14	14	1	1	2006-03-09	2006	0			NEGATIVO	0	0
19082	8	1	Boca Zapallito	14	14	1	1	2009-02-07	2009	0			NEGATIVO	0	0
18284	8	1	Colon del Onzole	19	15	1	1	2005-10-03	2005	0			NEGATIVO	0	0
18318	8	1	Colon del Onzole	19	15	1	2	2005-10-03	2005	0			NEGATIVO	0	0
18286	9	1	Colon del Onzole	19	15	1	1	2005-10-03	2005	0			NEGATIVO	0	0
18285	11	1	Colon del Onzole	19	15	1	2	2005-10-03	2005	0			NEGATIVO	0	0
18317	12	1	Colon del Onzole	19	15	1	1	2005-10-03	2005	0			NEGATIVO	0	0
18319	12	1	Colon del Onzole	19	15	1	1	2005-10-03	2005	0			NEGATIVO	0	0
18261	9	1	Colon del Onzole	19	15	1	2	2005-10-04	2005	0			NEGATIVO	0	0
18263	9	1	Colon del Onzole	19	15	1	1	2005-10-04	2005	0			NEGATIVO	0	0
18262	15	1	Colon del Onzole	19	15	1	1	2005-10-04	2005	0			NEGATIVO	0	0
18234	7	3	Colon del Onzole	19	15	1	2	2005-10-05	2005	0			NEGATIVO	0	0
18268	7	1	Colon del Onzole	19	15	1	2	2005-10-05	2005	0			NEGATIVO	0	0
18363	7	1	Colon del Onzole	19	15	1	2	2005-10-05	2005	0			NEGATIVO	0	0
18270	8	1	Colon del Onzole	19	15	1	1	2005-10-05	2005	0			NEGATIVO	0	0
18324	8	1	Colon del Onzole	19	15	1	1	2005-10-05	2005	0			NEGATIVO	0	0
18366	8	1	Colon del Onzole	19	15	1	1	2005-10-05	2005	0			NEGATIVO	0	0
18242	9	1	Colon del Onzole	19	15	1	1	2005-10-05	2005	0			NEGATIVO	0	0
18306	9	1	Colon del Onzole	19	15	1	1	2005-10-05	2005	0			NEGATIVO	0	0
18353	9	1	Colon del Onzole	19	15	1	2	2005-10-05	2005	0			NEGATIVO	0	0
18340	10	1	Colon del Onzole	19	15	1	2	2005-10-05	2005	0			NEGATIVO	0	0
18275	11	1	Colon del Onzole	19	15	1	1	2005-10-05	2005	0			NEGATIVO	0	0
18350	11	1	Colon del Onzole	19	15	1	1	2005-10-05	2005	0			NEGATIVO	0	0
18283	12	1	Colon del Onzole	19	15	1	1	2005-10-05	2005	0			NEGATIVO	0	0
18312	12	1	Colon del Onzole	19	15	1	2	2005-10-05	2005	0			NEGATIVO	0	0
18313	12	1	Colon del Onzole	19	15	1	2	2005-10-05	2005	0			NEGATIVO	0	0
18326	12	1	Colon del Onzole	19	15	1	2	2005-10-05	2005	0			NEGATIVO	0	0
18352	12	1	Colon del Onzole	19	15	1	2	2005-10-05	2005	0			NEGATIVO	0	0
18365	12	1	Colon del Onzole	19	15	1	1	2005-10-05	2005	0			NEGATIVO	0	0
18271	13	1	Colon del Onzole	19	15	1	1	2005-10-05	2005	0			NEGATIVO	0	0
18276	13	1	Colon del Onzole	19	15	1	1	2005-10-05	2005	0			NEGATIVO	0	0
18325	13	1	Colon del Onzole	19	15	1	1	2005-10-05	2005	0			NEGATIVO	0	0
18364	13	1	Colon del Onzole	19	15	1	1	2005-10-05	2005	0			NEGATIVO	0	0
18272	15	1	Colon del Onzole	19	15	1	1	2005-10-05	2005	0			NEGATIVO	0	0
18301	15	3	Colon del Onzole	19	15	1	2	2005-10-05	2005	0			NEGATIVO	0	0
18252	7	1	Colon del Onzole	19	15	1	1	2005-10-09	2005	0			NEGATIVO	0	0
18256	7	1	Colon del Onzole	19	15	1	1	2005-10-09	2005	0			NEGATIVO	0	0
18300	7	1	Colon del Onzole	19	15	1	2	2005-10-09	2005	0			NEGATIVO	0	0
18232	8	1	Colon del Onzole	19	15	1	2	2005-10-09	2005	0			NEGATIVO	0	0
18253	8	1	Colon del Onzole	19	15	1	1	2005-10-09	2005	0			NEGATIVO	0	0
18288	8	1	Colon del Onzole	19	15	1	1	2005-10-09	2005	0			NEGATIVO	0	0
18302	8	1	Colon del Onzole	19	15	1	1	2005-10-09	2005	0			NEGATIVO	0	0
18328	8	1	Colon del Onzole	19	15	1	1	2005-10-09	2005	0			NEGATIVO	0	0
18244	9	1	Colon del Onzole	19	15	1	2	2005-10-09	2005	0			NEGATIVO	0	0
18259	9	1	Colon del Onzole	19	15	1	1	2005-10-09	2005	0			NEGATIVO	0	0
18266	9	1	Colon del Onzole	19	15	1	2	2005-10-09	2005	0			NEGATIVO	0	0
18292	9	1	Colon del Onzole	19	15	1	2	2005-10-09	2005	0			NEGATIVO	0	0
18227	10	1	Colon del Onzole	19	15	1	2	2005-10-09	2005	0			NEGATIVO	0	0
18240	10	1	Colon del Onzole	19	15	1	2	2005-10-09	2005	0			NEGATIVO	0	0
18260	10	1	Colon del Onzole	19	15	1	2	2005-10-09	2005	0			NEGATIVO	0	0
18332	10	1	Colon del Onzole	19	15	1	1	2005-10-09	2005	0			NEGATIVO	0	0
18347	10	1	Colon del Onzole	19	15	1	2	2005-10-09	2005	0			NEGATIVO	0	0
18217	11	1	Colon del Onzole	19	15	1	1	2005-10-09	2005	0			NEGATIVO	0	0
18296	11	1	Colon del Onzole	19	15	1	2	2005-10-09	2005	0			NEGATIVO	0	0
18345	11	1	Colon del Onzole	19	15	1	2	2005-10-09	2005	0			NEGATIVO	0	0
18348	11	1	Colon del Onzole	19	15	1	1	2005-10-09	2005	0			NEGATIVO	0	0
18354	11	1	Colon del Onzole	19	15	1	1	2005-10-09	2005	0			NEGATIVO	0	0
18358	11	1	Colon del Onzole	19	15	1	2	2005-10-09	2005	0			NEGATIVO	0	0
18236	12	1	Colon del Onzole	19	15	1	1	2005-10-09	2005	0			NEGATIVO	0	0
18238	12	1	Colon del Onzole	19	15	1	2	2005-10-09	2005	0			NEGATIVO	0	0
18258	12	1	Colon del Onzole	19	15	1	2	2005-10-09	2005	0			NEGATIVO	0	0
18264	12	1	Colon del Onzole	19	15	1	2	2005-10-09	2005	0			NEGATIVO	0	0
18321	13	1	Colon del Onzole	19	15	1	2	2005-10-09	2005	0			NEGATIVO	0	0
18376	13	1	Colon del Onzole	19	15	1	1	2005-10-09	2005	0			NEGATIVO	0	0
18287	14	1	Colon del Onzole	19	15	1	2	2005-10-09	2005	0			NEGATIVO	0	0
18307	14	1	Colon del Onzole	19	15	1	1	2005-10-09	2005	0			NEGATIVO	0	0
18377	14	1	Colon del Onzole	19	15	1	1	2005-10-09	2005	0			NEGATIVO	0	0
18278	15	1	Colon del Onzole	19	15	1	1	2005-10-09	2005	0			NEGATIVO	0	0
18338	15	1	Colon del Onzole	19	15	1	2	2005-10-09	2005	0			NEGATIVO	0	0
18360	15	1	Colon del Onzole	19	15	1	1	2005-10-09	2005	0			NEGATIVO	0	0
18298	7	1	Colon del Onzole	19	15	1	1	2005-10-10	2005	0			NEGATIVO	0	0
18220	7	1	Colon del Onzole	19	15	1	2	2005-10-10	2005	0			NEGATIVO	0	0
18243	7	1	Colon del Onzole	19	15	1	1	2005-10-10	2005	0			NEGATIVO	0	0
18267	7	1	Colon del Onzole	19	15	1	2	2005-10-10	2005	0			NEGATIVO	0	0
18281	7	1	Colon del Onzole	19	15	1	2	2005-10-10	2005	0			NEGATIVO	0	0
18222	8	1	Colon del Onzole	19	15	1	1	2005-10-10	2005	0			NEGATIVO	0	0
18228	8	1	Colon del Onzole	19	15	1	2	2005-10-10	2005	0			NEGATIVO	0	0
18239	8	1	Colon del Onzole	19	15	1	1	2005-10-10	2005	0			NEGATIVO	0	0
18248	8	1	Colon del Onzole	19	15	1	1	2005-10-10	2005	0			NEGATIVO	0	0
18315	9	1	Colon del Onzole	19	15	1	1	2005-10-10	2005	0			NEGATIVO	0	0
18343	9	1	Colon del Onzole	19	15	1	2	2005-10-10	2005	0			NEGATIVO	0	0
18356	9	1	Colon del Onzole	19	15	1	2	2005-10-10	2005	0			NEGATIVO	0	0
18241	11	1	Colon del Onzole	19	15	1	2	2005-10-10	2005	0			NEGATIVO	0	0
18280	12	1	Colon del Onzole	19	15	1	1	2005-10-10	2005	0			NEGATIVO	0	0
18293	12	1	Colon del Onzole	19	15	1	1	2005-10-10	2005	0			NEGATIVO	0	0
18219	13	1	Colon del Onzole	19	15	1	1	2005-10-10	2005	0			NEGATIVO	0	0
18233	13	1	Colon del Onzole	19	15	1	1	2005-10-10	2005	0			NEGATIVO	0	0
18246	14	1	Colon del Onzole	19	15	1	2	2005-10-10	2005	0			NEGATIVO	0	0
18369	14	1	Colon del Onzole	19	15	1	2	2005-10-10	2005	0			NEGATIVO	0	0
18221	15	1	Colon del Onzole	19	15	1	1	2005-10-10	2005	0			NEGATIVO	0	0
18231	15	1	Colon del Onzole	19	15	1	1	2005-10-10	2005	0			NEGATIVO	0	0
18357	15	1	Colon del Onzole	19	15	1	1	2005-10-10	2005	0			NEGATIVO	0	0
18305	7	1	Colon del Onzole	19	15	1	1	2005-10-11	2005	0			NEGATIVO	0	0
18371	7	1	Colon del Onzole	19	15	1	1	2005-10-11	2005	0			NEGATIVO	0	0
18380	12	1	Colon del Onzole	19	15	1	1	2005-10-11	2005	0			NEGATIVO	0	0
18379	14	1	Colon del Onzole	19	15	1	2	2005-10-11	2005	0			NEGATIVO	0	0
18322	8	1	Colon del Onzole	19	15	1	1	2005-10-15	2005	0			NEGATIVO	0	0
18505	7	1	Colon del Onzole	19	15	1	2	2005-11-08	2005	0			NEGATIVO	0	0
18509	7	1	Colon del Onzole	19	15	1	1	2005-11-08	2005	0			NEGATIVO	0	0
18374	8	1	Colon del Onzole	19	15	1	1	2005-11-08	2005	0			NEGATIVO	0	0
18342	9	1	Colon del Onzole	19	15	1	1	2005-11-08	2005	0			NEGATIVO	0	0
18373	10	1	Colon del Onzole	19	15	1	2	2005-11-08	2005	0			NEGATIVO	0	0
18506	10	1	Colon del Onzole	19	15	1	2	2005-11-08	2005	0			NEGATIVO	0	0
18344	12	1	Colon del Onzole	19	15	1	2	2005-11-08	2005	0			NEGATIVO	0	0
18508	13	1	Colon del Onzole	19	15	1	1	2005-11-08	2005	0			NEGATIVO	0	0
18341	14	1	Colon del Onzole	19	15	1	1	2005-11-08	2005	0			NEGATIVO	0	0
18504	15	1	Colon del Onzole	19	15	1	1	2005-11-08	2005	0			NEGATIVO	0	0
18507	8	1	Colon del Onzole	19	15	1	2	2005-11-20	2005	0			NEGATIVO	0	0
18295	13	1	Colon del Onzole	19	15	1	1	2008-05-14	2008	0			NEGATIVO	0	0
18251	7	1	Colon del Onzole	19	15	1	1	2009-01-14	2009	0			NEGATIVO	0	0
18339	7	1	Colon del Onzole	19	15	1	1	2009-01-14	2009	0			NEGATIVO	0	0
18355	7	1	Colon del Onzole	19	15	1	2	2009-01-14	2009	0			NEGATIVO	0	0
18378	7	1	Colon del Onzole	19	15	1	2	2009-01-14	2009	0			NEGATIVO	0	0
18274	8	1	Colon del Onzole	19	15	1	1	2009-01-14	2009	0			NEGATIVO	0	0
18335	8	1	Colon del Onzole	19	15	1	1	2009-01-14	2009	0			NEGATIVO	0	0
18368	8	1	Colon del Onzole	19	15	1	2	2009-01-14	2009	0			NEGATIVO	0	0
18223	10	1	Colon del Onzole	19	15	1	2	2009-01-14	2009	0			NEGATIVO	0	0
18235	10	1	Colon del Onzole	19	15	1	2	2009-01-14	2009	0			NEGATIVO	0	0
18349	10	1	Colon del Onzole	19	15	1	2	2009-01-14	2009	0			NEGATIVO	0	0
18230	11	1	Colon del Onzole	19	15	1	2	2009-01-14	2009	0			NEGATIVO	0	0
18245	11	1	Colon del Onzole	19	15	1	2	2009-01-14	2009	0			NEGATIVO	0	0
18310	12	1	Colon del Onzole	19	15	1	2	2009-01-14	2009	0			NEGATIVO	0	0
18329	12	1	Colon del Onzole	19	15	1	2	2009-01-14	2009	0			NEGATIVO	0	0
18337	12	1	Colon del Onzole	19	15	1	2	2009-01-14	2009	0			NEGATIVO	0	0
18359	12	1	Colon del Onzole	19	15	1	2	2009-01-14	2009	0			NEGATIVO	0	0
18333	13	1	Colon del Onzole	19	15	1	2	2009-01-14	2009	0			NEGATIVO	0	0
18225	14	1	Colon del Onzole	19	15	1	1	2009-01-14	2009	0			NEGATIVO	0	0
18226	14	1	Colon del Onzole	19	15	1	2	2009-01-14	2009	0			NEGATIVO	0	0
18316	14	1	Colon del Onzole	19	15	1	1	2009-01-14	2009	0			NEGATIVO	0	0
18277	15	1	Colon del Onzole	19	15	1	2	2009-01-14	2009	0			NEGATIVO	0	0
18361	15	1	Colon del Onzole	19	15	1	2	2009-01-14	2009	0			NEGATIVO	0	0
18303	14	1	Colon del Onzole	19	15	1	1	2009-01-14	2009	1	1	0	TREATED	1	1
18265	9	1	Colon del Onzole	19	15	1	2	2009-01-24	2009	0			NEGATIVO	0	0
18375	15	1	Sto. Dgo.del Onzole	20	16	1	2	2005-10-10	2005	0			NEGATIVO	0	0
18464	7	1	Sto. Dgo.del Onzole	20	16	1	2	2005-10-14	2005	0			NEGATIVO	0	0
18430	8	1	Sto. Dgo.del Onzole	20	16	1	1	2005-10-14	2005	0			NEGATIVO	0	0
18399	9	1	Sto. Dgo.del Onzole	20	16	1	1	2005-10-14	2005	0			NEGATIVO	0	0
18403	9	1	Sto. Dgo.del Onzole	20	16	1	2	2005-10-14	2005	0			NEGATIVO	0	0
18406	9	1	Sto. Dgo.del Onzole	20	16	1	1	2005-10-14	2005	0			NEGATIVO	0	0
18433	9	1	Sto. Dgo.del Onzole	20	16	1	2	2005-10-14	2005	0			NEGATIVO	0	0
18448	9	1	Sto. Dgo.del Onzole	20	16	1	1	2005-10-14	2005	0			NEGATIVO	0	0
18472	9	1	Sto. Dgo.del Onzole	20	16	1	2	2005-10-14	2005	0			NEGATIVO	0	0
18382	10	1	Sto. Dgo.del Onzole	20	16	1	1	2005-10-14	2005	0			NEGATIVO	0	0
18416	10	1	Sto. Dgo.del Onzole	20	16	1	1	2005-10-14	2005	0			NEGATIVO	0	0
18438	10	1	Sto. Dgo.del Onzole	20	16	1	1	2005-10-14	2005	0			NEGATIVO	0	0
18461	10	1	Sto. Dgo.del Onzole	20	16	1	2	2005-10-14	2005	0			NEGATIVO	0	0
18384	11	1	Sto. Dgo.del Onzole	20	16	1	1	2005-10-14	2005	0			NEGATIVO	0	0
18393	12	1	Sto. Dgo.del Onzole	20	16	1	1	2005-10-14	2005	0			NEGATIVO	0	0
18463	14	1	Sto. Dgo.del Onzole	20	16	1	2	2005-10-14	2005	0			NEGATIVO	0	0
18469	15	1	Sto. Dgo.del Onzole	20	16	1	1	2005-10-14	2005	0			NEGATIVO	0	0
18391	7	1	Sto. Dgo.del Onzole	20	16	1	1	2005-10-15	2005	0			NEGATIVO	0	0
18397	7	1	Sto. Dgo.del Onzole	20	16	1	1	2005-10-15	2005	0			NEGATIVO	0	0
18405	7	1	Sto. Dgo.del Onzole	20	16	1	1	2005-10-15	2005	0			NEGATIVO	0	0
18478	7	1	Sto. Dgo.del Onzole	20	16	1	1	2005-10-15	2005	0			NEGATIVO	0	0
18413	8	1	Sto. Dgo.del Onzole	20	16	1	2	2005-10-15	2005	0			NEGATIVO	0	0
18437	8	1	Sto. Dgo.del Onzole	20	16	1	2	2005-10-15	2005	0			NEGATIVO	0	0
18475	8	1	Sto. Dgo.del Onzole	20	16	1	2	2005-10-15	2005	0			NEGATIVO	0	0
18476	8	1	Sto. Dgo.del Onzole	20	16	1	1	2005-10-15	2005	0			NEGATIVO	0	0
18414	9	1	Sto. Dgo.del Onzole	20	16	1	2	2005-10-15	2005	0			NEGATIVO	0	0
18421	9	1	Sto. Dgo.del Onzole	20	16	1	1	2005-10-15	2005	0			NEGATIVO	0	0
18449	9	1	Sto. Dgo.del Onzole	20	16	1	2	2005-10-15	2005	0			NEGATIVO	0	0
18477	9	1	Sto. Dgo.del Onzole	20	16	1	1	2005-10-15	2005	0			NEGATIVO	0	0
18441	11	1	Sto. Dgo.del Onzole	20	16	1	1	2005-10-15	2005	0			NEGATIVO	0	0
18398	12	1	Sto. Dgo.del Onzole	20	16	1	1	2005-10-15	2005	0			NEGATIVO	0	0
18404	12	1	Sto. Dgo.del Onzole	20	16	1	2	2005-10-15	2005	0			NEGATIVO	0	0
18408	12	1	Sto. Dgo.del Onzole	20	16	1	1	2005-10-15	2005	0			NEGATIVO	0	0
18440	12	1	Sto. Dgo.del Onzole	20	16	1	2	2005-10-15	2005	0			NEGATIVO	0	0
18468	12	1	Sto. Dgo.del Onzole	20	16	1	2	2005-10-15	2005	0			NEGATIVO	0	0
18482	12	1	Sto. Dgo.del Onzole	20	16	1	2	2005-10-15	2005	0			NEGATIVO	0	0
18415	13	1	Sto. Dgo.del Onzole	20	16	1	1	2005-10-15	2005	0			NEGATIVO	0	0
18459	13	1	Sto. Dgo.del Onzole	20	16	1	1	2005-10-15	2005	0			NEGATIVO	0	0
18483	13	1	Sto. Dgo.del Onzole	20	16	1	2	2005-10-15	2005	0			NEGATIVO	0	0
18485	13	1	Sto. Dgo.del Onzole	20	16	1	1	2005-10-15	2005	0			NEGATIVO	0	0
18412	14	1	Sto. Dgo.del Onzole	20	16	1	1	2005-10-15	2005	0			NEGATIVO	0	0
18435	14	1	Sto. Dgo.del Onzole	20	16	1	1	2005-10-15	2005	0			NEGATIVO	0	0
18452	14	1	Sto. Dgo.del Onzole	20	16	1	1	2005-10-15	2005	0			NEGATIVO	0	0
18458	14	1	Sto. Dgo.del Onzole	20	16	1	2	2005-10-15	2005	0			NEGATIVO	0	0
18481	14	1	Sto. Dgo.del Onzole	20	16	1	2	2005-10-15	2005	0			NEGATIVO	0	0
18487	15	1	Sto. Dgo.del Onzole	20	16	1	2	2005-10-15	2005	0			NEGATIVO	0	0
18396	7	1	Sto. Dgo.del Onzole	20	16	1	1	2005-10-16	2005	0			NEGATIVO	0	0
18418	7	1	Sto. Dgo.del Onzole	20	16	1	2	2005-10-16	2005	0			NEGATIVO	0	0
18426	7	1	Sto. Dgo.del Onzole	20	16	1	1	2005-10-16	2005	0			NEGATIVO	0	0
18489	7	1	Sto. Dgo.del Onzole	20	16	1	1	2005-10-16	2005	0			NEGATIVO	0	0
18383	8	1	Sto. Dgo.del Onzole	20	16	1	2	2005-10-16	2005	0			NEGATIVO	0	0
18466	9	1	Sto. Dgo.del Onzole	20	16	1	1	2005-10-16	2005	0			NEGATIVO	0	0
18410	10	1	Sto. Dgo.del Onzole	20	16	1	1	2005-10-16	2005	0			NEGATIVO	0	0
18474	10	1	Sto. Dgo.del Onzole	20	16	1	2	2005-10-16	2005	0			NEGATIVO	0	0
18394	11	1	Sto. Dgo.del Onzole	20	16	1	2	2005-10-16	2005	0			NEGATIVO	0	0
18392	12	1	Sto. Dgo.del Onzole	20	16	1	1	2005-10-16	2005	0			NEGATIVO	0	0
18401	12	1	Sto. Dgo.del Onzole	20	16	1	2	2005-10-16	2005	0			NEGATIVO	0	0
18419	12	1	Sto. Dgo.del Onzole	20	16	1	1	2005-10-16	2005	0			NEGATIVO	0	0
18428	12	1	Sto. Dgo.del Onzole	20	16	1	1	2005-10-16	2005	0			NEGATIVO	0	0
18488	12	1	Sto. Dgo.del Onzole	20	16	1	1	2005-10-16	2005	0			NEGATIVO	0	0
18388	13	1	Sto. Dgo.del Onzole	20	16	1	2	2005-10-16	2005	0			NEGATIVO	0	0
18431	13	1	Sto. Dgo.del Onzole	20	16	1	1	2005-10-16	2005	0			NEGATIVO	0	0
18386	14	1	Sto. Dgo.del Onzole	20	16	1	2	2005-10-16	2005	0			NEGATIVO	0	0
18427	14	1	Sto. Dgo.del Onzole	20	16	1	1	2005-10-16	2005	0			NEGATIVO	0	0
18450	14	1	Sto. Dgo.del Onzole	20	16	1	2	2005-10-16	2005	0			NEGATIVO	0	0
18479	14	1	Sto. Dgo.del Onzole	20	16	1	1	2005-10-16	2005	0			NEGATIVO	0	0
18446	15	1	Sto. Dgo.del Onzole	20	16	1	1	2005-10-16	2005	0			NEGATIVO	0	0
18451	15	1	Sto. Dgo.del Onzole	20	16	1	1	2005-10-16	2005	0			NEGATIVO	0	0
18499	7	1	Sto. Dgo.del Onzole	20	16	1	1	2005-11-06	2005	0			NEGATIVO	0	0
18490	11	1	Sto. Dgo.del Onzole	20	16	1	1	2005-11-06	2005	0			NEGATIVO	0	0
18494	11	1	Sto. Dgo.del Onzole	20	16	1	2	2005-11-06	2005	0			NEGATIVO	0	0
18496	11	1	Sto. Dgo.del Onzole	20	16	1	1	2005-11-06	2005	0			NEGATIVO	0	0
18492	13	1	Sto. Dgo.del Onzole	20	16	1	1	2005-11-06	2005	0			NEGATIVO	0	0
18498	13	1	Sto. Dgo.del Onzole	20	16	1	1	2005-11-06	2005	0			NEGATIVO	0	0
18497	15	1	Sto. Dgo.del Onzole	20	16	1	1	2005-11-06	2005	0			NEGATIVO	0	0
18501	11	1	Sto. Dgo.del Onzole	20	16	1	1	2005-11-07	2005	0			NEGATIVO	0	0
18500	14	1	Sto. Dgo.del Onzole	20	16	1	1	2005-11-07	2005	0			NEGATIVO	0	0
18429	10	1	Sto. Dgo.del Onzole	20	16	1	2	2006-01-10	2006	0			NEGATIVO	0	0
18385	9	1	Sto. Dgo.del Onzole	20	16	1	1	2006-10-16	2006	0			NEGATIVO	0	0
18454	11	1	Sto. Dgo.del Onzole	20	16	1	2	2008-01-13	2008	0			NEGATIVO	0	0
18513	14	1	Sto. Dgo.del Onzole	20	16	1	1	2009-01-12	2009	0			NEGATIVO	0	0
18456	15	1	Sto. Dgo.del Onzole	20	16	1	1	2009-01-12	2009	0			NEGATIVO	0	0
18395	7	1	Sto. Dgo.del Onzole	20	16	1	2	2009-01-13	2009	0			NEGATIVO	0	0
18491	7	1	Sto. Dgo.del Onzole	20	16	1	2	2009-01-13	2009	0			NEGATIVO	0	0
18512	7	1	Sto. Dgo.del Onzole	20	16	1	2	2009-01-13	2009	0			NEGATIVO	0	0
18389	8	1	Sto. Dgo.del Onzole	20	16	1	2	2009-01-13	2009	0			NEGATIVO	0	0
18447	8	1	Sto. Dgo.del Onzole	20	16	1	2	2009-01-13	2009	0			NEGATIVO	0	0
18407	9	1	Sto. Dgo.del Onzole	20	16	1	2	2009-01-13	2009	0			NEGATIVO	0	0
18467	9	1	Sto. Dgo.del Onzole	20	16	1	2	2009-01-13	2009	0			NEGATIVO	0	0
18502	9	1	Sto. Dgo.del Onzole	20	16	1	1	2009-01-13	2009	0			NEGATIVO	0	0
18493	10	1	Sto. Dgo.del Onzole	20	16	1	1	2009-01-13	2009	0			NEGATIVO	0	0
18417	11	1	Sto. Dgo.del Onzole	20	16	1	2	2009-01-13	2009	0			NEGATIVO	0	0
18455	11	1	Sto. Dgo.del Onzole	20	16	1	1	2009-01-13	2009	0			NEGATIVO	0	0
18423	12	1	Sto. Dgo.del Onzole	20	16	1	1	2009-01-13	2009	0			NEGATIVO	0	0
18462	12	1	Sto. Dgo.del Onzole	20	16	1	1	2009-01-13	2009	0			NEGATIVO	0	0
18480	13	1	Sto. Dgo.del Onzole	20	16	1	1	2009-01-13	2009	0			NEGATIVO	0	0
18381	13	1	Sto. Dgo.del Onzole	20	16	1	2	2009-01-13	2009	0			NEGATIVO	0	0
18402	14	1	Sto. Dgo.del Onzole	20	16	1	1	2009-01-13	2009	0			NEGATIVO	0	0
18409	14	1	Sto. Dgo.del Onzole	20	16	1	1	2009-01-13	2009	0			NEGATIVO	0	0
18425	15	1	Sto. Dgo.del Onzole	20	16	1	1	2009-01-13	2009	0			NEGATIVO	0	0
18432	15	1	Sto. Dgo.del Onzole	20	16	1	1	2009-01-13	2009	0			NEGATIVO	0	0
18484	15	1	Sto. Dgo.del Onzole	20	16	1	1	2009-01-13	2009	0			NEGATIVO	0	0
18465	11	1	Sto. Dgo.del Onzole	20	16	1	1	2009-01-15	2009	0			NEGATIVO	0	0
18932	10	1	Bella Aurora	22	20	0	2	2005-10-14	2005	0			NEGATIVO	0	0
18917	7	1	Bella Aurora	22	20	0	1	2006-02-09	2006	0			NEGATIVO	0	0
18919	7	1	Bella Aurora	22	20	0	2	2006-02-09	2006	0			NEGATIVO	0	0
18924	7	3	Bella Aurora	22	20	0	2	2006-02-09	2006	0			NEGATIVO	0	0
18930	7	3	Bella Aurora	22	20	0	2	2006-02-09	2006	0			NEGATIVO	0	0
18916	8	3	Bella Aurora	22	20	0	2	2006-02-09	2006	0			NEGATIVO	0	0
18915	9	1	Bella Aurora	22	20	0	2	2006-02-09	2006	0			NEGATIVO	0	0
18922	9	1	Bella Aurora	22	20	0	1	2006-02-09	2006	0			NEGATIVO	0	0
18921	10	1	Bella Aurora	22	20	0	1	2006-02-09	2006	0			NEGATIVO	0	0
18928	10	3	Bella Aurora	22	20	0	1	2006-02-09	2006	0			NEGATIVO	0	0
18927	11	3	Bella Aurora	22	20	0	1	2006-02-09	2006	0			NEGATIVO	0	0
18937	12	1	Bella Aurora	22	20	0	2	2006-02-09	2006	0			NEGATIVO	0	0
18920	13	1	Bella Aurora	22	20	0	1	2006-02-09	2006	0			NEGATIVO	0	0
18923	13	1	Bella Aurora	22	20	0	2	2006-02-09	2006	0			NEGATIVO	0	0
18929	14	3	Bella Aurora	22	20	0	2	2006-02-09	2006	0			NEGATIVO	0	0
18918	15	1	Bella Aurora	22	20	0	2	2006-02-09	2006	0			NEGATIVO	0	0
18925	15	1	Bella Aurora	22	20	0	1	2006-02-09	2006	0			NEGATIVO	0	0
18931	11	1	Bella Aurora	22	20	0	2	2008-05-21	2008	0			NEGATIVO	0	0
20247	8	1	Cacagual	23	20	0	1	2006-08-18	2006	0			NEGATIVO	0	0
20249	7	1	Cacagual	23	20	0	1	2006-09-16	2006	0			NEGATIVO	0	0
20250	7	1	Cacagual	23	20	0	2	2006-09-16	2006	0			NEGATIVO	0	0
20251	7	1	Cacagual	23	20	0	2	2006-09-16	2006	0			NEGATIVO	0	0
20266	7	1	Cacagual	23	20	0	1	2006-09-16	2006	0			NEGATIVO	0	0
20253	7	1	Cacagual	23	20	0	1	2006-09-16	2006	0			NEGATIVO	0	0
20254	8	1	Cacagual	23	20	0	1	2006-09-16	2006	0			NEGATIVO	0	0
20261	8	1	Cacagual	23	20	0	2	2006-09-16	2006	1	0	0	NEGATIVO	0	0
20248	9	1	Cacagual	23	20	0	2	2006-09-16	2006	0			NEGATIVO	0	0
20264	9	1	Cacagual	23	20	0	1	2006-09-16	2006	0			NEGATIVO	0	0
20256	10	1	Cacagual	23	20	0	2	2006-09-16	2006	0			NEGATIVO	0	0
20257	10	1	Cacagual	23	20	0	2	2006-09-16	2006	0			NEGATIVO	0	0
20255	11	1	Cacagual	23	20	0	2	2006-09-16	2006	0			NEGATIVO	0	0
20258	11	1	Cacagual	23	20	0	1	2006-09-16	2006	0			NEGATIVO	0	0
20265	12	1	Cacagual	23	20	0	1	2006-09-16	2006	0			NEGATIVO	0	0
20260	12	1	Cacagual	23	20	0	1	2006-09-16	2006	0			NEGATIVO	0	0
20259	13	1	Cacagual	23	20	0	1	2006-09-16	2006	0			NEGATIVO	0	0
20262	13	1	Cacagual	23	20	0	1	2006-09-16	2006	0			NEGATIVO	0	0
20263	15	1	Cacagual	23	20	0	1	2006-09-16	2006	0			NEGATIVO	0	0
20252	13	1	Cacagual	23	20	0	1	2008-06-09	2008	0			NEGATIVO	0	0
9046	8	2	Calceta, Manabi	76	20	0	1	2017-03-25	2017	0			NEGATIVO	0	0
21010	7	1	Canchimalero	25	20	0	2	2007-01-31	2007	0			NEGATIVO	0	0
21012	7	1	Canchimalero	25	20	0	1	2007-01-31	2007	0			NEGATIVO	0	0
21013	9	1	Canchimalero	25	20	0	1	2007-01-31	2007	0			NEGATIVO	0	0
21009	10	1	Canchimalero	25	20	0	1	2007-01-31	2007	0			NEGATIVO	0	0
21011	13	1	Canchimalero	25	20	0	1	2007-01-31	2007	0			NEGATIVO	0	0
21033	12	1	Canchimalero	25	20	0	1	2007-02-01	2007	0			NEGATIVO	0	0
21028	10	1	Canchimalero	25	20	0	1	2007-02-01	2007	1	1	1	ACTIVE	1	2
21025	8	1	Canchimalero	25	20	0	1	2007-02-01	2007	1	0	1	NEGATIVO	0	0
21020	7	1	Canchimalero	25	20	0	1	2007-02-01	2007	0			NEGATIVO	0	0
21035	7	1	Canchimalero	25	20	0	1	2007-02-01	2007	0			NEGATIVO	0	0
21014	8	1	Canchimalero	25	20	0	2	2007-02-01	2007	0			NEGATIVO	0	0
21021	8	1	Canchimalero	25	20	0	2	2007-02-01	2007	0			NEGATIVO	0	0
21034	8	1	Canchimalero	25	20	0	2	2007-02-01	2007	0			NEGATIVO	0	0
21024	8	1	Canchimalero	25	20	0	2	2007-02-01	2007	0			NEGATIVO	0	0
21026	9	1	Canchimalero	25	20	0	2	2007-02-01	2007	0			NEGATIVO	0	0
21030	9	1	Canchimalero	25	20	0	1	2007-02-01	2007	0			NEGATIVO	0	0
21027	10	1	Canchimalero	25	20	0	2	2007-02-01	2007	1	0	0	NEGATIVO	0	0
21016	11	1	Canchimalero	25	20	0	2	2007-02-01	2007	0			NEGATIVO	0	0
21032	11	1	Canchimalero	25	20	0	2	2007-02-01	2007	0			NEGATIVO	0	0
21036	11	1	Canchimalero	25	20	0	1	2007-02-01	2007	0			NEGATIVO	0	0
21037	12	1	Canchimalero	25	20	0	1	2007-02-01	2007	0			NEGATIVO	0	0
21015	13	1	Canchimalero	25	20	0	2	2007-02-01	2007	0			NEGATIVO	0	0
21029	13	1	Canchimalero	25	20	0	1	2007-02-01	2007	0			NEGATIVO	0	0
21031	13	1	Canchimalero	25	20	0	2	2007-02-01	2007	0			NEGATIVO	0	0
21038	14	1	Canchimalero	25	20	0	1	2007-02-01	2007	0			NEGATIVO	0	0
21017	15	1	Canchimalero	25	20	0	1	2007-02-01	2007	0			NEGATIVO	0	0
21023	7	1	Canchimalero	25	20	0	1	2008-03-21	2008	0			NEGATIVO	0	0
21022	9	1	Canchimalero	25	20	0	2	2008-04-21	2008	0			NEGATIVO	0	0
20279	7	1	Capricho	26	20	0	2	2006-10-03	2006	0			NEGATIVO	0	0
20273	9	1	Capricho	26	20	0	1	2006-10-03	2006	0			NEGATIVO	0	0
20275	10	1	Capricho	26	20	0	2	2006-10-03	2006	0			NEGATIVO	0	0
20281	15	1	Capricho	26	20	0	2	2006-10-03	2006	0			NEGATIVO	0	0
20298	7	2	Capricho	26	20	0	2	2006-10-04	2006	0			NEGATIVO	0	0
20297	8	2	Capricho	26	20	0	2	2006-10-04	2006	0			NEGATIVO	0	0
20296	10	2	Capricho	26	20	0	2	2006-10-04	2006	0			NEGATIVO	0	0
20299	13	1	Capricho	26	20	0	2	2006-10-04	2006	0			NEGATIVO	0	0
19960	8	1	Cuerval	33	20	0	1	2006-08-11	2006	1	1	1	ACTIVE	1	2
19961	7	1	Cuerval	33	20	0	2	2006-08-11	2006	0			NEGATIVO	0	0
19963	7	1	Cuerval	33	20	0	2	2006-08-11	2006	0			NEGATIVO	0	0
19958	8	1	Cuerval	33	20	0	1	2006-08-11	2006	0			NEGATIVO	0	0
19962	8	1	Cuerval	33	20	0	1	2006-08-11	2006	0			NEGATIVO	0	0
19964	8	1	Cuerval	33	20	0	2	2006-08-11	2006	0			NEGATIVO	0	0
19968	9	1	Cuerval	33	20	0	1	2006-08-11	2006	0			NEGATIVO	0	0
19969	9	1	Cuerval	33	20	0	2	2006-08-11	2006	0			NEGATIVO	0	0
19959	10	1	Cuerval	33	20	0	2	2006-08-11	2006	0			NEGATIVO	0	0
19971	10	1	Cuerval	33	20	0	1	2006-08-11	2006	0			NEGATIVO	0	0
19970	11	1	Cuerval	33	20	0	1	2006-08-11	2006	0			NEGATIVO	0	0
19974	11	1	Cuerval	33	20	0	1	2006-08-11	2006	0			NEGATIVO	0	0
19966	12	1	Cuerval	33	20	0	1	2006-08-11	2006	0			NEGATIVO	0	0
19956	13	1	Cuerval	33	20	0	1	2006-08-11	2006	0			NEGATIVO	0	0
19973	13	1	Cuerval	33	20	0	1	2006-08-11	2006	0			NEGATIVO	0	0
19965	14	1	Cuerval	33	20	0	1	2006-08-11	2006	0			NEGATIVO	0	0
19975	14	1	Cuerval	33	20	0	2	2006-08-11	2006	0			NEGATIVO	0	0
19972	15	1	Cuerval	33	20	0	1	2006-08-11	2006	0			NEGATIVO	0	0
19976	15	1	Cuerval	33	20	0	1	2006-08-11	2006	0			NEGATIVO	0	0
19977	15	1	Cuerval	33	20	0	1	2006-08-11	2006	0			NEGATIVO	0	0
19978	7	1	Cuerval	33	20	0	1	2006-08-12	2006	0			NEGATIVO	0	0
19985	7	1	Cuerval	33	20	0	1	2006-08-12	2006	0			NEGATIVO	0	0
19980	8	1	Cuerval	33	20	0	1	2006-08-12	2006	0			NEGATIVO	0	0
19983	8	1	Cuerval	33	20	0	1	2006-08-12	2006	0			NEGATIVO	0	0
19982	9	1	Cuerval	33	20	0	1	2006-08-12	2006	0			NEGATIVO	0	0
19984	11	1	Cuerval	33	20	0	1	2006-08-12	2006	0			NEGATIVO	0	0
19981	11	1	Cuerval	33	20	0	2	2006-08-12	2006	0			NEGATIVO	0	0
19979	12	1	Cuerval	33	20	0	2	2006-08-12	2006	0			NEGATIVO	0	0
19986	13	1	Cuerval	33	20	0	1	2006-08-12	2006	0			NEGATIVO	0	0
19987	9	1	Cuerval	33	20	0	1	2006-08-14	2006	0			NEGATIVO	0	0
20986	12	1	El Bajito	35	20	0	1	2006-01-29	2006	0			NEGATIVO	0	0
20992	14	1	El Bajito	35	20	0	2	2007-01-15	2007	0			NEGATIVO	0	0
20990	7	1	El Bajito	35	20	0	2	2007-01-29	2007	0			NEGATIVO	0	0
21000	7	1	El Bajito	35	20	0	2	2007-01-29	2007	0			NEGATIVO	0	0
21002	8	1	El Bajito	35	20	0	1	2007-01-29	2007	0			NEGATIVO	0	0
20987	9	1	El Bajito	35	20	0	2	2007-01-29	2007	0			NEGATIVO	0	0
21006	10	1	El Bajito	35	20	0	1	2007-01-29	2007	0			NEGATIVO	0	0
21005	13	1	El Bajito	35	20	0	1	2007-01-29	2007	0			NEGATIVO	0	0
21008	13	1	El Bajito	35	20	0	1	2007-01-29	2007	0			NEGATIVO	0	0
20989	9	1	El Bajito	35	20	0	2	2007-10-29	2007	0			NEGATIVO	0	0
20984	12	1	El Bajito	35	20	0	2	2007-10-29	2007	0			NEGATIVO	0	0
20988	15	1	El Bajito	35	20	0	2	2007-10-29	2007	0			NEGATIVO	0	0
20993	12	1	El Bajito	35	20	0	1	2008-04-16	2008	0			NEGATIVO	0	0
20991	7	1	El Bajito	35	20	0	2	2008-04-21	2008	0			NEGATIVO	0	0
20997	10	1	El Bajito	35	20	0	1	2008-04-21	2008	0			NEGATIVO	0	0
21001	10	1	El Bajito	35	20	0	1	2008-04-21	2008	0			NEGATIVO	0	0
21007	10	1	El Bajito	35	20	0	1	2008-04-21	2008	0			NEGATIVO	0	0
20985	14	1	El Bajito	35	20	0	1	2008-04-21	2008	0			NEGATIVO	0	0
20998	8	1	El Bajito	35	20	0	2	2008-04-24	2008	0			NEGATIVO	0	0
18999	14	1	La Alegr�a	41	20	0	1	2006-02-13	2006	0			NEGATIVO	0	0
19007	7	1	La Alegr�a	41	20	0	2	2006-02-15	2006	0			NEGATIVO	0	0
19008	7	1	La Alegr�a	41	20	0	2	2006-02-15	2006	0			NEGATIVO	0	0
19009	7	1	La Alegr�a	41	20	0	2	2006-02-15	2006	0			NEGATIVO	0	0
19022	7	1	La Alegr�a	41	20	0	2	2006-02-15	2006	0			NEGATIVO	0	0
19002	8	1	La Alegr�a	41	20	0	1	2006-02-15	2006	0			NEGATIVO	0	0
19010	8	1	La Alegr�a	41	20	0	2	2006-02-15	2006	0			NEGATIVO	0	0
19012	8	1	La Alegr�a	41	20	0	1	2006-02-15	2006	0			NEGATIVO	0	0
19020	8	1	La Alegr�a	41	20	0	1	2006-02-15	2006	0			NEGATIVO	0	0
19001	9	1	La Alegr�a	41	20	0	1	2006-02-15	2006	0			NEGATIVO	0	0
19000	10	1	La Alegr�a	41	20	0	1	2006-02-15	2006	0			NEGATIVO	0	0
19013	10	1	La Alegr�a	41	20	0	2	2006-02-15	2006	0			NEGATIVO	0	0
19019	10	1	La Alegr�a	41	20	0	2	2006-02-15	2006	0			NEGATIVO	0	0
19003	11	1	La Alegr�a	41	20	0	1	2006-02-15	2006	0			NEGATIVO	0	0
19004	12	1	La Alegr�a	41	20	0	1	2006-02-15	2006	0			NEGATIVO	0	0
19014	12	1	La Alegr�a	41	20	0	2	2006-02-15	2006	0			NEGATIVO	0	0
19021	12	1	La Alegr�a	41	20	0	2	2006-02-15	2006	0			NEGATIVO	0	0
19005	13	1	La Alegr�a	41	20	0	2	2006-02-15	2006	0			NEGATIVO	0	0
19011	15	1	La Alegr�a	41	20	0	2	2006-02-15	2006	0			NEGATIVO	0	0
19017	15	1	La Alegr�a	41	20	0	1	2006-02-15	2006	1	0	0	NEGATIVO	0	0
19018	15	1	La Alegr�a	41	20	0	1	2006-02-15	2006	0			NEGATIVO	0	0
19016	7	1	La Alegr�a	41	20	0	1	2008-05-21	2008	0			NEGATIVO	0	0
19015	11	1	La Alegr�a	41	20	0	1	2008-05-21	2008	0			NEGATIVO	0	0
20239	6	1	La Barca	42	20	0	1	2006-09-14	2006	0			NEGATIVO	0	0
20234	7	1	La Barca	42	20	0	2	2006-09-14	2006	0			NEGATIVO	0	0
20232	8	1	La Barca	42	20	0	1	2006-09-14	2006	0			NEGATIVO	0	0
20240	8	1	La Barca	42	20	0	2	2006-09-14	2006	0			NEGATIVO	0	0
20243	8	1	La Barca	42	20	0	2	2006-09-14	2006	0			NEGATIVO	0	0
20233	9	1	La Barca	42	20	0	2	2006-09-14	2006	0			NEGATIVO	0	0
20238	9	1	La Barca	42	20	0	2	2006-09-14	2006	0			NEGATIVO	0	0
20241	10	1	La Barca	42	20	0	1	2006-09-14	2006	0			NEGATIVO	0	0
20230	11	1	La Barca	42	20	0	2	2006-09-14	2006	0			NEGATIVO	0	0
20231	11	1	La Barca	42	20	0	1	2006-09-14	2006	0			NEGATIVO	0	0
20237	11	1	La Barca	42	20	0	2	2006-09-14	2006	0			NEGATIVO	0	0
20236	13	1	La Barca	42	20	0	1	2006-09-14	2006	0			NEGATIVO	0	0
20228	14	1	La Barca	42	20	0	2	2006-09-14	2006	0			NEGATIVO	0	0
20242	14	1	La Barca	42	20	0	1	2006-09-14	2006	0			NEGATIVO	0	0
20245	12	1	La Barca	42	20	0	2	2006-09-16	2006	0			NEGATIVO	0	0
20246	12	1	La Barca	42	20	0	2	2006-09-16	2006	0			NEGATIVO	0	0
20244	15	1	La Barca	42	20	0	2	2006-09-16	2006	0			NEGATIVO	0	0
20235	9	1	La Barca	42	20	0	2	2008-07-16	2008	0			NEGATIVO	0	0
20229	13	1	La Barca	42	20	0	1	2008-07-16	2008	0			NEGATIVO	0	0
18940	11	1	La Loma	45	20	0	2	2006-01-16	2006	0			NEGATIVO	0	0
18944	7	1	La Loma	45	20	0	2	2006-02-11	2006	0			NEGATIVO	0	0
18945	7	1	La Loma	45	20	0	1	2006-02-11	2006	0			NEGATIVO	0	0
18951	7	1	La Loma	45	20	0	1	2006-02-11	2006	0			NEGATIVO	0	0
18964	7	1	La Loma	45	20	0	1	2006-02-11	2006	0			NEGATIVO	0	0
18968	7	1	La Loma	45	20	0	2	2006-02-11	2006	0			NEGATIVO	0	0
18949	8	1	La Loma	45	20	0	1	2006-02-11	2006	0			NEGATIVO	0	0
18959	8	1	La Loma	45	20	0	2	2006-02-11	2006	0			NEGATIVO	0	0
18947	9	1	La Loma	45	20	0	2	2006-02-11	2006	0			NEGATIVO	0	0
18954	9	1	La Loma	45	20	0	2	2006-02-11	2006	0			NEGATIVO	0	0
18957	9	1	La Loma	45	20	0	1	2006-02-11	2006	0			NEGATIVO	0	0
18969	9	1	La Loma	45	20	0	1	2006-02-11	2006	0			NEGATIVO	0	0
18965	10	1	La Loma	45	20	0	1	2006-02-11	2006	0			NEGATIVO	0	0
18953	11	1	La Loma	45	20	0	1	2006-02-11	2006	0			NEGATIVO	0	0
18955	11	1	La Loma	45	20	0	1	2006-02-11	2006	0			NEGATIVO	0	0
18956	11	1	La Loma	45	20	0	2	2006-02-11	2006	0			NEGATIVO	0	0
18966	11	1	La Loma	45	20	0	1	2006-02-11	2006	0			NEGATIVO	0	0
18958	12	1	La Loma	45	20	0	1	2006-02-11	2006	0			NEGATIVO	0	0
18970	12	1	La Loma	45	20	0	1	2006-02-11	2006	0			NEGATIVO	0	0
18943	13	1	La Loma	45	20	0	1	2006-02-11	2006	0			NEGATIVO	0	0
18946	13	1	La Loma	45	20	0	2	2006-02-11	2006	0			NEGATIVO	0	0
18950	13	1	La Loma	45	20	0	1	2006-02-11	2006	0			NEGATIVO	0	0
18952	13	1	La Loma	45	20	0	1	2006-02-11	2006	0			NEGATIVO	0	0
18948	14	1	La Loma	45	20	0	2	2006-02-11	2006	0			NEGATIVO	0	0
18967	14	1	La Loma	45	20	0	2	2006-02-11	2006	0			NEGATIVO	0	0
18942	14	1	La Loma	45	20	0	2	2008-05-21	2008	0			NEGATIVO	0	0
19033	8	1	La Palma	46	20	0	1	2006-02-17	2006	0			NEGATIVO	0	0
19031	7	1	La Palma	46	20	0	2	2006-02-17	2006	0			NEGATIVO	0	0
19037	7	3	La Palma	46	20	0	1	2006-02-17	2006	0			NEGATIVO	0	0
19023	8	1	La Palma	46	20	0	1	2006-02-17	2006	0			NEGATIVO	0	0
19026	8	1	La Palma	46	20	0	1	2006-02-17	2006	0			NEGATIVO	0	0
19030	8	1	La Palma	46	20	0	1	2006-02-17	2006	0			NEGATIVO	0	0
19025	10	1	La Palma	46	20	0	2	2006-02-17	2006	0			NEGATIVO	0	0
19028	10	1	La Palma	46	20	0	2	2006-02-17	2006	0			NEGATIVO	0	0
19032	10	3	La Palma	46	20	0	1	2006-02-17	2006	0			NEGATIVO	0	0
19029	11	1	La Palma	46	20	0	2	2006-02-17	2006	0			NEGATIVO	0	0
19035	11	3	La Palma	46	20	0	2	2006-02-17	2006	0			NEGATIVO	0	0
19027	12	1	La Palma	46	20	0	1	2006-02-17	2006	0			NEGATIVO	0	0
19024	13	1	La Palma	46	20	0	1	2006-02-17	2006	0			NEGATIVO	0	0
19038	9	1	La Palma	46	20	0	2	2006-02-18	2006	0			NEGATIVO	0	0
19034	7	1	La Palma	46	20	0	2	2008-05-21	2008	0			NEGATIVO	0	0
19039	15	1	La Palma	46	20	0	1	2008-05-21	2008	0			NEGATIVO	0	0
18978	7	1	La Pampa	47	20	0	1	2006-02-13	2006	0			NEGATIVO	0	0
18984	7	1	La Pampa	47	20	0	1	2006-02-13	2006	0			NEGATIVO	0	0
18997	7	1	La Pampa	47	20	0	1	2006-02-13	2006	0			NEGATIVO	0	0
18976	8	1	La Pampa	47	20	0	1	2006-02-13	2006	0			NEGATIVO	0	0
18989	8	1	La Pampa	47	20	0	2	2006-02-13	2006	0			NEGATIVO	0	0
18991	8	1	La Pampa	47	20	0	2	2006-02-13	2006	0			NEGATIVO	0	0
18998	8	1	La Pampa	47	20	0	1	2006-02-13	2006	0			NEGATIVO	0	0
18975	9	1	La Pampa	47	20	0	2	2006-02-13	2006	0			NEGATIVO	0	0
18980	9	1	La Pampa	47	20	0	1	2006-02-13	2006	0			NEGATIVO	0	0
18987	10	1	La Pampa	47	20	0	1	2006-02-13	2006	0			NEGATIVO	0	0
18992	10	1	La Pampa	47	20	0	1	2006-02-13	2006	0			NEGATIVO	0	0
18977	11	1	La Pampa	47	20	0	2	2006-02-13	2006	0			NEGATIVO	0	0
18983	11	1	La Pampa	47	20	0	1	2006-02-13	2006	0			NEGATIVO	0	0
18972	12	1	La Pampa	47	20	0	1	2006-02-13	2006	0			NEGATIVO	0	0
18993	12	1	La Pampa	47	20	0	2	2006-02-13	2006	0			NEGATIVO	0	0
18973	13	1	La Pampa	47	20	0	1	2006-02-13	2006	1	0	0	NEGATIVO	0	0
18979	13	1	La Pampa	47	20	0	1	2006-02-13	2006	0			NEGATIVO	0	0
18981	13	1	La Pampa	47	20	0	1	2006-02-13	2006	0			NEGATIVO	0	0
18996	14	1	La Pampa	47	20	0	1	2006-02-13	2006	0			NEGATIVO	0	0
18971	15	1	La Pampa	47	20	0	1	2006-02-13	2006	0			NEGATIVO	0	0
18982	15	1	La Pampa	47	20	0	2	2006-02-13	2006	0			NEGATIVO	0	0
18986	15	1	La Pampa	47	20	0	1	2006-02-13	2006	0			NEGATIVO	0	0
18988	15	1	La Pampa	47	20	0	2	2006-02-13	2006	0			NEGATIVO	0	0
18995	7	1	La Pampa	47	20	0	1	2008-05-21	2008	0			NEGATIVO	0	0
18974	8	1	La Pampa	47	20	0	1	2008-05-21	2008	0			NEGATIVO	0	0
18994	9	1	La Pampa	47	20	0	2	2008-05-21	2008	0			NEGATIVO	0	0
19669	10	1	La Tola	49	20	0	2	2005-07-09	2005	0			NEGATIVO	0	0
19943	8	1	La Tola	49	20	0	1	2005-07-14	2005	0			NEGATIVO	0	0
19780	12	1	La Tola	49	20	0	2	2005-12-11	2005	0			NEGATIVO	0	0
19650	7	1	La Tola	49	20	0	2	2006-07-09	2006	0			NEGATIVO	0	0
19652	7	1	La Tola	49	20	0	2	2006-07-09	2006	0			NEGATIVO	0	0
19653	7	1	La Tola	49	20	0	1	2006-07-09	2006	0			NEGATIVO	0	0
19665	7	1	La Tola	49	20	0	2	2006-07-09	2006	1	0	0	NEGATIVO	0	0
19671	7	1	La Tola	49	20	0	1	2006-07-09	2006	0			NEGATIVO	0	0
19640	8	1	La Tola	49	20	0	2	2006-07-09	2006	0			NEGATIVO	0	0
19647	8	1	La Tola	49	20	0	1	2006-07-09	2006	0			NEGATIVO	0	0
19667	8	1	La Tola	49	20	0	1	2006-07-09	2006	0			NEGATIVO	0	0
19672	8	1	La Tola	49	20	0	1	2006-07-09	2006	0			NEGATIVO	0	0
19678	8	1	La Tola	49	20	0	2	2006-07-09	2006	0			NEGATIVO	0	0
19680	8	1	La Tola	49	20	0	2	2006-07-09	2006	0			NEGATIVO	0	0
19695	8	1	La Tola	49	20	0	2	2006-07-09	2006	0			NEGATIVO	0	0
19686	8	1	La Tola	49	20	0	2	2006-07-09	2006	0			NEGATIVO	0	0
19688	8	1	La Tola	49	20	0	1	2006-07-09	2006	0			NEGATIVO	0	0
19663	9	1	La Tola	49	20	0	2	2006-07-09	2006	0			NEGATIVO	0	0
19694	9	1	La Tola	49	20	0	2	2006-07-09	2006	0			NEGATIVO	0	0
19692	9	1	La Tola	49	20	0	1	2006-07-09	2006	0			NEGATIVO	0	0
19639	10	1	La Tola	49	20	0	2	2006-07-09	2006	0			NEGATIVO	0	0
19642	10	2	La Tola	49	20	0	2	2006-07-09	2006	0			NEGATIVO	0	0
19649	10	1	La Tola	49	20	0	2	2006-07-09	2006	0			NEGATIVO	0	0
19657	10	1	La Tola	49	20	0	2	2006-07-09	2006	0			NEGATIVO	0	0
19660	10	1	La Tola	49	20	0	2	2006-07-09	2006	0			NEGATIVO	0	0
19661	10	1	La Tola	49	20	0	2	2006-07-09	2006	0			NEGATIVO	0	0
19664	10	1	La Tola	49	20	0	1	2006-07-09	2006	0			NEGATIVO	0	0
19666	10	1	La Tola	49	20	0	2	2006-07-09	2006	0			NEGATIVO	0	0
19668	10	1	La Tola	49	20	0	2	2006-07-09	2006	0			NEGATIVO	0	0
19670	10	1	La Tola	49	20	0	2	2006-07-09	2006	0			NEGATIVO	0	0
19673	10	1	La Tola	49	20	0	2	2006-07-09	2006	0			NEGATIVO	0	0
19691	10	1	La Tola	49	20	0	1	2006-07-09	2006	0			NEGATIVO	0	0
19637	10	1	La Tola	49	20	0	1	2006-07-09	2006	0			NEGATIVO	0	0
19638	11	1	La Tola	49	20	0	2	2006-07-09	2006	0			NEGATIVO	0	0
19641	11	1	La Tola	49	20	0	1	2006-07-09	2006	0			NEGATIVO	0	0
19644	11	1	La Tola	49	20	0	1	2006-07-09	2006	0			NEGATIVO	0	0
19655	11	1	La Tola	49	20	0	2	2006-07-09	2006	0			NEGATIVO	0	0
19662	11	1	La Tola	49	20	0	2	2006-07-09	2006	0			NEGATIVO	0	0
19674	11	1	La Tola	49	20	0	2	2006-07-09	2006	0			NEGATIVO	0	0
19693	11	1	La Tola	49	20	0	2	2006-07-09	2006	0			NEGATIVO	0	0
19782	11	1	La Tola	49	20	0	2	2006-07-09	2006	0			NEGATIVO	0	0
19648	12	1	La Tola	49	20	0	2	2006-07-09	2006	0			NEGATIVO	0	0
19658	12	1	La Tola	49	20	0	2	2006-07-09	2006	0			NEGATIVO	0	0
19685	12	1	La Tola	49	20	0	1	2006-07-09	2006	0			NEGATIVO	0	0
19689	12	1	La Tola	49	20	0	1	2006-07-09	2006	0			NEGATIVO	0	0
19696	12	1	La Tola	49	20	0	2	2006-07-09	2006	0			NEGATIVO	0	0
19646	12	1	La Tola	49	20	0	2	2006-07-09	2006	0			NEGATIVO	0	0
19697	12	1	La Tola	49	20	0	2	2006-07-09	2006	0			NEGATIVO	0	0
19643	13	1	La Tola	49	20	0	2	2006-07-09	2006	0			NEGATIVO	0	0
19651	13	1	La Tola	49	20	0	2	2006-07-09	2006	0			NEGATIVO	0	0
19659	13	1	La Tola	49	20	0	1	2006-07-09	2006	0			NEGATIVO	0	0
19681	13	1	La Tola	49	20	0	2	2006-07-09	2006	0			NEGATIVO	0	0
19698	13	1	La Tola	49	20	0	2	2006-07-09	2006	0			NEGATIVO	0	0
19683	13	1	La Tola	49	20	0	2	2006-07-09	2006	0			NEGATIVO	0	0
19656	14	1	La Tola	49	20	0	2	2006-07-09	2006	0			NEGATIVO	0	0
19676	14	1	La Tola	49	20	0	1	2006-07-09	2006	0			NEGATIVO	0	0
19679	14	1	La Tola	49	20	0	2	2006-07-09	2006	0			NEGATIVO	0	0
19677	15	1	La Tola	49	20	0	2	2006-07-09	2006	0			NEGATIVO	0	0
19684	15	1	La Tola	49	20	0	2	2006-07-09	2006	0			NEGATIVO	0	0
19705	6	1	La Tola	49	20	0	2	2006-07-10	2006	0			NEGATIVO	0	0
19690	7	1	La Tola	49	20	0	2	2006-07-10	2006	0			NEGATIVO	0	0
19702	7	1	La Tola	49	20	0	2	2006-07-10	2006	0			NEGATIVO	0	0
19703	7	1	La Tola	49	20	0	1	2006-07-10	2006	0			NEGATIVO	0	0
19704	7	2	La Tola	49	20	0	1	2006-07-10	2006	0			NEGATIVO	0	0
19706	7	1	La Tola	49	20	0	1	2006-07-10	2006	0			NEGATIVO	0	0
19739	7	2	La Tola	49	20	0	2	2006-07-10	2006	0			NEGATIVO	0	0
19742	7	1	La Tola	49	20	0	1	2006-07-10	2006	0			NEGATIVO	0	0
19743	7	2	La Tola	49	20	0	1	2006-07-10	2006	0			NEGATIVO	0	0
19876	7	1	La Tola	49	20	0	1	2006-07-10	2006	0			NEGATIVO	0	0
19699	7	1	La Tola	49	20	0	1	2006-07-10	2006	0			NEGATIVO	0	0
19701	7	1	La Tola	49	20	0	1	2006-07-10	2006	0			NEGATIVO	0	0
19708	8	1	La Tola	49	20	0	1	2006-07-10	2006	0			NEGATIVO	0	0
19717	8	1	La Tola	49	20	0	2	2006-07-10	2006	0			NEGATIVO	0	0
19721	8	1	La Tola	49	20	0	1	2006-07-10	2006	0			NEGATIVO	0	0
19732	8	1	La Tola	49	20	0	2	2006-07-10	2006	0			NEGATIVO	0	0
19733	8	1	La Tola	49	20	0	1	2006-07-10	2006	0			NEGATIVO	0	0
19737	8	1	La Tola	49	20	0	2	2006-07-10	2006	0			NEGATIVO	0	0
19753	8	1	La Tola	49	20	0	2	2006-07-10	2006	0			NEGATIVO	0	0
19720	8	1	La Tola	49	20	0	2	2006-07-10	2006	0			NEGATIVO	0	0
19716	8	1	La Tola	49	20	0	2	2006-07-10	2006	0			NEGATIVO	0	0
19718	8	1	La Tola	49	20	0	2	2006-07-10	2006	0			NEGATIVO	0	0
19722	8	1	La Tola	49	20	0	2	2006-07-10	2006	0			NEGATIVO	0	0
19700	9	1	La Tola	49	20	0	1	2006-07-10	2006	0			NEGATIVO	0	0
19713	9	1	La Tola	49	20	0	1	2006-07-10	2006	0			NEGATIVO	0	0
19731	9	1	La Tola	49	20	0	1	2006-07-10	2006	0			NEGATIVO	0	0
19740	9	1	La Tola	49	20	0	1	2006-07-10	2006	0			NEGATIVO	0	0
19719	9	1	La Tola	49	20	0	2	2006-07-10	2006	0			NEGATIVO	0	0
19725	10	1	La Tola	49	20	0	2	2006-07-10	2006	0			NEGATIVO	0	0
19726	10	1	La Tola	49	20	0	2	2006-07-10	2006	0			NEGATIVO	0	0
19736	10	1	La Tola	49	20	0	1	2006-07-10	2006	0			NEGATIVO	0	0
19738	10	2	La Tola	49	20	0	1	2006-07-10	2006	0			NEGATIVO	0	0
19723	10	1	La Tola	49	20	0	2	2006-07-10	2006	0			NEGATIVO	0	0
19735	10	1	La Tola	49	20	0	1	2006-07-10	2006	0			NEGATIVO	0	0
19727	11	1	La Tola	49	20	0	1	2006-07-10	2006	0			NEGATIVO	0	0
19747	11	1	La Tola	49	20	0	2	2006-07-10	2006	0			NEGATIVO	0	0
19752	11	1	La Tola	49	20	0	2	2006-07-10	2006	0			NEGATIVO	0	0
19712	11	1	La Tola	49	20	0	2	2006-07-10	2006	0			NEGATIVO	0	0
19714	11	1	La Tola	49	20	0	2	2006-07-10	2006	0			NEGATIVO	0	0
19728	11	1	La Tola	49	20	0	2	2006-07-10	2006	0			NEGATIVO	0	0
19707	12	2	La Tola	49	20	0	1	2006-07-10	2006	0			NEGATIVO	0	0
19710	12	1	La Tola	49	20	0	1	2006-07-10	2006	0			NEGATIVO	0	0
19711	12	1	La Tola	49	20	0	1	2006-07-10	2006	0			NEGATIVO	0	0
19715	12	1	La Tola	49	20	0	1	2006-07-10	2006	0			NEGATIVO	0	0
19741	12	2	La Tola	49	20	0	1	2006-07-10	2006	0			NEGATIVO	0	0
19748	12	1	La Tola	49	20	0	2	2006-07-10	2006	0			NEGATIVO	0	0
19749	12	1	La Tola	49	20	0	2	2006-07-10	2006	0			NEGATIVO	0	0
19724	13	1	La Tola	49	20	0	2	2006-07-10	2006	0			NEGATIVO	0	0
19746	13	1	La Tola	49	20	0	2	2006-07-10	2006	0			NEGATIVO	0	0
19709	14	1	La Tola	49	20	0	2	2006-07-10	2006	0			NEGATIVO	0	0
19745	14	1	La Tola	49	20	0	2	2006-07-10	2006	0			NEGATIVO	0	0
19744	15	1	La Tola	49	20	0	1	2006-07-10	2006	0			NEGATIVO	0	0
19730	15	1	La Tola	49	20	0	1	2006-07-10	2006	0			NEGATIVO	0	0
19783	6	1	La Tola	49	20	0	1	2006-07-11	2006	0			NEGATIVO	0	0
19761	7	2	La Tola	49	20	0	2	2006-07-11	2006	0			NEGATIVO	0	0
19764	7	1	La Tola	49	20	0	1	2006-07-11	2006	0			NEGATIVO	0	0
19796	7	1	La Tola	49	20	0	1	2006-07-11	2006	0			NEGATIVO	0	0
19759	8	1	La Tola	49	20	0	2	2006-07-11	2006	0			NEGATIVO	0	0
19763	8	2	La Tola	49	20	0	1	2006-07-11	2006	0			NEGATIVO	0	0
19767	8	2	La Tola	49	20	0	2	2006-07-11	2006	0			NEGATIVO	0	0
19781	8	1	La Tola	49	20	0	1	2006-07-11	2006	0			NEGATIVO	0	0
19794	8	1	La Tola	49	20	0	1	2006-07-11	2006	0			NEGATIVO	0	0
19765	8	1	La Tola	49	20	0	1	2006-07-11	2006	0			NEGATIVO	0	0
19809	8	1	La Tola	49	20	0	2	2006-07-11	2006	0			NEGATIVO	0	0
19774	9	2	La Tola	49	20	0	1	2006-07-11	2006	0			NEGATIVO	0	0
19797	9	1	La Tola	49	20	0	2	2006-07-11	2006	0			NEGATIVO	0	0
19802	9	2	La Tola	49	20	0	1	2006-07-11	2006	0			NEGATIVO	0	0
19760	9	1	La Tola	49	20	0	1	2006-07-11	2006	0			NEGATIVO	0	0
19766	10	1	La Tola	49	20	0	1	2006-07-11	2006	0			NEGATIVO	0	0
19778	10	2	La Tola	49	20	0	2	2006-07-11	2006	0			NEGATIVO	0	0
19787	10	1	La Tola	49	20	0	2	2006-07-11	2006	0			NEGATIVO	0	0
19790	10	1	La Tola	49	20	0	2	2006-07-11	2006	0			NEGATIVO	0	0
19819	10	1	La Tola	49	20	0	1	2006-07-11	2006	0			NEGATIVO	0	0
19812	10	1	La Tola	49	20	0	1	2006-07-11	2006	0			NEGATIVO	0	0
19823	10	1	La Tola	49	20	0	1	2006-07-11	2006	0			NEGATIVO	0	0
19758	10	1	La Tola	49	20	0	1	2006-07-11	2006	0			NEGATIVO	0	0
19772	11	2	La Tola	49	20	0	1	2006-07-11	2006	0			NEGATIVO	0	0
19779	11	1	La Tola	49	20	0	1	2006-07-11	2006	0			NEGATIVO	0	0
19821	11	1	La Tola	49	20	0	1	2006-07-11	2006	0			NEGATIVO	0	0
19773	12	2	La Tola	49	20	0	2	2006-07-11	2006	0			NEGATIVO	0	0
19798	12	1	La Tola	49	20	0	2	2006-07-11	2006	0			NEGATIVO	0	0
19799	12	1	La Tola	49	20	0	2	2006-07-11	2006	0			NEGATIVO	0	0
19810	12	1	La Tola	49	20	0	2	2006-07-11	2006	0			NEGATIVO	0	0
19818	12	1	La Tola	49	20	0	2	2006-07-11	2006	0			NEGATIVO	0	0
19822	12	1	La Tola	49	20	0	2	2006-07-11	2006	0			NEGATIVO	0	0
19756	12	1	La Tola	49	20	0	1	2006-07-11	2006	0			NEGATIVO	0	0
19811	12	1	La Tola	49	20	0	2	2006-07-11	2006	0			NEGATIVO	0	0
19824	12	1	La Tola	49	20	0	1	2006-07-11	2006	0			NEGATIVO	0	0
19771	13	1	La Tola	49	20	0	2	2006-07-11	2006	0			NEGATIVO	0	0
19788	13	1	La Tola	49	20	0	2	2006-07-11	2006	0			NEGATIVO	0	0
19793	13	1	La Tola	49	20	0	1	2006-07-11	2006	0			NEGATIVO	0	0
19804	13	1	La Tola	49	20	0	1	2006-07-11	2006	0			NEGATIVO	0	0
19813	13	1	La Tola	49	20	0	2	2006-07-11	2006	0			NEGATIVO	0	0
19682	14	1	La Tola	49	20	0	1	2006-07-11	2006	0			NEGATIVO	0	0
19785	14	1	La Tola	49	20	0	2	2006-07-11	2006	0			NEGATIVO	0	0
19800	14	1	La Tola	49	20	0	1	2006-07-11	2006	0			NEGATIVO	0	0
19814	14	1	La Tola	49	20	0	1	2006-07-11	2006	0			NEGATIVO	0	0
19815	14	1	La Tola	49	20	0	1	2006-07-11	2006	0			NEGATIVO	0	0
19755	14	1	La Tola	49	20	0	2	2006-07-11	2006	0			NEGATIVO	0	0
19808	14	1	La Tola	49	20	0	1	2006-07-11	2006	0			NEGATIVO	0	0
19816	14	1	La Tola	49	20	0	2	2006-07-11	2006	0			NEGATIVO	0	0
19805	14	1	La Tola	49	20	0	1	2006-07-11	2006	0			NEGATIVO	0	0
19776	15	1	La Tola	49	20	0	1	2006-07-11	2006	0			NEGATIVO	0	0
19777	15	1	La Tola	49	20	0	1	2006-07-11	2006	0			NEGATIVO	0	0
19803	15	1	La Tola	49	20	0	1	2006-07-11	2006	0			NEGATIVO	0	0
19807	15	1	La Tola	49	20	0	2	2006-07-11	2006	0			NEGATIVO	0	0
19827	7	1	La Tola	49	20	0	2	2006-07-12	2006	0			NEGATIVO	0	0
19825	8	1	La Tola	49	20	0	1	2006-07-12	2006	0			NEGATIVO	0	0
19829	10	1	La Tola	49	20	0	2	2006-07-12	2006	0			NEGATIVO	0	0
19826	10	1	La Tola	49	20	0	1	2006-07-12	2006	0			NEGATIVO	0	0
19833	11	2	La Tola	49	20	0	2	2006-07-12	2006	0			NEGATIVO	0	0
19838	11	1	La Tola	49	20	0	2	2006-07-12	2006	0			NEGATIVO	0	0
19839	11	1	La Tola	49	20	0	2	2006-07-12	2006	0			NEGATIVO	0	0
19831	12	1	La Tola	49	20	0	2	2006-07-12	2006	0			NEGATIVO	0	0
19837	13	1	La Tola	49	20	0	1	2006-07-12	2006	0			NEGATIVO	0	0
19835	14	1	La Tola	49	20	0	2	2006-07-12	2006	0			NEGATIVO	0	0
19840	14	1	La Tola	49	20	0	1	2006-07-12	2006	0			NEGATIVO	0	0
19830	15	1	La Tola	49	20	0	1	2006-07-12	2006	0			NEGATIVO	0	0
19789	8	1	La Tola	49	20	0	1	2006-07-13	2006	0			NEGATIVO	0	0
19864	8	1	La Tola	49	20	0	1	2006-07-14	2006	0			NEGATIVO	0	0
19868	9	1	La Tola	49	20	0	1	2006-07-14	2006	0			NEGATIVO	0	0
19863	11	1	La Tola	49	20	0	2	2006-07-14	2006	0			NEGATIVO	0	0
19841	11	1	La Tola	49	20	0	1	2006-07-14	2006	0			NEGATIVO	0	0
19844	12	1	La Tola	49	20	0	2	2006-07-14	2006	0			NEGATIVO	0	0
19853	12	1	La Tola	49	20	0	2	2006-07-14	2006	0			NEGATIVO	0	0
19860	12	1	La Tola	49	20	0	2	2006-07-14	2006	0			NEGATIVO	0	0
19851	13	1	La Tola	49	20	0	2	2006-07-14	2006	0			NEGATIVO	0	0
19855	13	1	La Tola	49	20	0	2	2006-07-14	2006	0			NEGATIVO	0	0
19847	13	1	La Tola	49	20	0	2	2006-07-14	2006	0			NEGATIVO	0	0
19854	13	1	La Tola	49	20	0	2	2006-07-14	2006	0			NEGATIVO	0	0
19862	13	1	La Tola	49	20	0	2	2006-07-14	2006	0			NEGATIVO	0	0
19845	14	1	La Tola	49	20	0	1	2006-07-14	2006	0			NEGATIVO	0	0
19859	14	1	La Tola	49	20	0	1	2006-07-14	2006	0			NEGATIVO	0	0
19866	14	2	La Tola	49	20	0	1	2006-07-14	2006	0			NEGATIVO	0	0
19867	14	1	La Tola	49	20	0	2	2006-07-14	2006	0			NEGATIVO	0	0
19846	14	1	La Tola	49	20	0	2	2006-07-14	2006	0			NEGATIVO	0	0
19861	14	1	La Tola	49	20	0	1	2006-07-14	2006	0			NEGATIVO	0	0
19848	15	1	La Tola	49	20	0	2	2006-07-14	2006	0			NEGATIVO	0	0
19852	15	1	La Tola	49	20	0	1	2006-07-14	2006	0			NEGATIVO	0	0
19857	15	2	La Tola	49	20	0	1	2006-07-14	2006	0			NEGATIVO	0	0
19865	15	1	La Tola	49	20	0	1	2006-07-14	2006	0			NEGATIVO	0	0
19842	15	1	La Tola	49	20	0	1	2006-07-14	2006	0			NEGATIVO	0	0
19850	15	1	La Tola	49	20	0	1	2006-07-14	2006	0			NEGATIVO	0	0
19856	14	1	La Tola	49	20	0	2	2006-07-15	2006	0			NEGATIVO	0	0
19880	8	1	La Tola	49	20	0	2	2006-07-16	2006	0			NEGATIVO	0	0
19874	9	1	La Tola	49	20	0	1	2006-07-16	2006	0			NEGATIVO	0	0
19884	9	1	La Tola	49	20	0	1	2006-07-16	2006	0			NEGATIVO	0	0
19885	10	1	La Tola	49	20	0	2	2006-07-16	2006	0			NEGATIVO	0	0
19883	11	1	La Tola	49	20	0	2	2006-07-16	2006	0			NEGATIVO	0	0
19875	12	1	La Tola	49	20	0	2	2006-07-16	2006	0			NEGATIVO	0	0
19878	12	1	La Tola	49	20	0	1	2006-07-16	2006	0			NEGATIVO	0	0
19877	13	1	La Tola	49	20	0	2	2006-07-16	2006	0			NEGATIVO	0	0
19879	14	1	La Tola	49	20	0	2	2006-07-16	2006	0			NEGATIVO	0	0
19882	14	1	La Tola	49	20	0	2	2006-07-16	2006	0			NEGATIVO	0	0
19871	15	1	La Tola	49	20	0	2	2006-07-16	2006	0			NEGATIVO	0	0
19881	15	1	La Tola	49	20	0	2	2006-07-16	2006	0			NEGATIVO	0	0
19887	6	1	La Tola	49	20	0	1	2006-07-17	2006	0			NEGATIVO	0	0
19892	8	1	La Tola	49	20	0	2	2006-07-17	2006	0			NEGATIVO	0	0
19897	8	1	La Tola	49	20	0	2	2006-07-17	2006	0			NEGATIVO	0	0
19888	9	1	La Tola	49	20	0	2	2006-07-17	2006	0			NEGATIVO	0	0
19896	9	1	La Tola	49	20	0	2	2006-07-17	2006	0			NEGATIVO	0	0
19893	11	1	La Tola	49	20	0	1	2006-07-17	2006	0			NEGATIVO	0	0
19898	12	1	La Tola	49	20	0	1	2006-07-17	2006	0			NEGATIVO	0	0
19894	12	1	La Tola	49	20	0	1	2006-07-17	2006	0			NEGATIVO	0	0
19895	12	1	La Tola	49	20	0	1	2006-07-17	2006	0			NEGATIVO	0	0
19890	13	1	La Tola	49	20	0	2	2006-07-17	2006	0			NEGATIVO	0	0
19889	15	1	La Tola	49	20	0	2	2006-07-17	2006	0			NEGATIVO	0	0
19899	8	1	La Tola	49	20	0	1	2006-07-18	2006	0			NEGATIVO	0	0
19907	8	1	La Tola	49	20	0	2	2006-07-18	2006	0			NEGATIVO	0	0
19902	9	1	La Tola	49	20	0	2	2006-07-18	2006	0			NEGATIVO	0	0
19910	9	1	La Tola	49	20	0	2	2006-07-18	2006	0			NEGATIVO	0	0
19914	9	1	La Tola	49	20	0	2	2006-07-18	2006	0			NEGATIVO	0	0
19915	9	1	La Tola	49	20	0	2	2006-07-18	2006	0			NEGATIVO	0	0
19906	10	1	La Tola	49	20	0	1	2006-07-18	2006	0			NEGATIVO	0	0
19912	10	1	La Tola	49	20	0	1	2006-07-18	2006	0			NEGATIVO	0	0
19908	11	1	La Tola	49	20	0	2	2006-07-18	2006	0			NEGATIVO	0	0
19917	11	1	La Tola	49	20	0	1	2006-07-18	2006	0			NEGATIVO	0	0
19916	12	1	La Tola	49	20	0	1	2006-07-18	2006	0			NEGATIVO	0	0
19905	12	1	La Tola	49	20	0	1	2006-07-18	2006	0			NEGATIVO	0	0
19913	12	1	La Tola	49	20	0	1	2006-07-18	2006	0			NEGATIVO	0	0
19901	13	1	La Tola	49	20	0	2	2006-07-18	2006	0			NEGATIVO	0	0
19918	15	1	La Tola	49	20	0	1	2006-07-18	2006	0			NEGATIVO	0	0
19924	7	1	La Tola	49	20	0	1	2006-07-19	2006	0			NEGATIVO	0	0
19920	8	1	La Tola	49	20	0	1	2006-07-19	2006	0			NEGATIVO	0	0
19921	8	1	La Tola	49	20	0	2	2006-07-19	2006	0			NEGATIVO	0	0
19925	11	1	La Tola	49	20	0	1	2006-07-19	2006	0			NEGATIVO	0	0
19928	12	1	La Tola	49	20	0	2	2006-07-19	2006	0			NEGATIVO	0	0
19927	12	1	La Tola	49	20	0	1	2006-07-19	2006	0			NEGATIVO	0	0
19929	8	1	La Tola	49	20	0	2	2006-07-20	2006	0			NEGATIVO	0	0
19930	12	1	La Tola	49	20	0	2	2006-07-20	2006	0			NEGATIVO	0	0
19836	15	1	La Tola	49	20	0	1	2006-08-04	2006	0			NEGATIVO	0	0
19931	12	1	La Tola	49	20	0	2	2006-08-05	2006	0			NEGATIVO	0	0
19934	13	1	La Tola	49	20	0	1	2006-08-05	2006	0			NEGATIVO	0	0
19933	15	1	La Tola	49	20	0	2	2006-08-05	2006	0			NEGATIVO	0	0
19937	13	1	La Tola	49	20	0	1	2006-08-06	2006	0			NEGATIVO	0	0
19940	12	1	La Tola	49	20	0	2	2006-08-07	2006	0			NEGATIVO	0	0
19939	14	2	La Tola	49	20	0	2	2006-08-07	2006	0			NEGATIVO	0	0
19944	7	1	La Tola	49	20	0	1	2006-08-08	2006	0			NEGATIVO	0	0
19945	11	1	La Tola	49	20	0	1	2006-08-08	2006	0			NEGATIVO	0	0
19843	14	1	La Tola	49	20	0	1	2006-08-08	2006	0			NEGATIVO	0	0
19942	9	1	La Tola	49	20	0	2	2006-08-09	2006	0			NEGATIVO	0	0
19948	15	1	La Tola	49	20	0	2	2006-08-09	2006	0			NEGATIVO	0	0
19757	9	1	La Tola	49	20	0	1	2006-08-11	2006	0			NEGATIVO	0	0
19750	15	1	La Tola	49	20	0	1	2006-08-11	2006	0			NEGATIVO	0	0
19936	8	1	La Tola	49	20	0	1	2006-08-12	2006	0			NEGATIVO	0	0
19950	12	1	La Tola	49	20	0	1	2006-08-16	2006	0			NEGATIVO	0	0
19949	8	1	La Tola	49	20	0	2	2006-08-18	2006	0			NEGATIVO	0	0
19952	15	1	La Tola	49	20	0	1	2007-08-11	2007	0			NEGATIVO	0	0
19935	7	1	La Tola	49	20	0	1	2008-02-15	2008	1	0	0	NEGATIVO	0	0
19754	7	1	La Tola	49	20	0	1	2008-02-15	2008	0			NEGATIVO	0	0
19734	10	1	La Tola	49	20	0	1	2008-02-15	2008	0			NEGATIVO	0	0
19687	10	1	La Tola	49	20	0	1	2008-02-15	2008	0			NEGATIVO	0	0
19770	11	1	La Tola	49	20	0	1	2008-02-15	2008	0			NEGATIVO	0	0
19909	11	1	La Tola	49	20	0	1	2008-02-15	2008	0			NEGATIVO	0	0
19751	12	1	La Tola	49	20	0	1	2008-02-15	2008	0			NEGATIVO	0	0
19849	12	1	La Tola	49	20	0	2	2008-02-15	2008	0			NEGATIVO	0	0
19791	13	1	La Tola	49	20	0	1	2008-02-15	2008	0			NEGATIVO	0	0
19775	14	1	La Tola	49	20	0	1	2008-02-15	2008	0			NEGATIVO	0	0
19886	15	2	La Tola	49	20	0	1	2008-02-15	2008	1	0	0	NEGATIVO	0	0
19922	7	1	La Tola	49	20	0	2	2008-02-16	2008	0			NEGATIVO	0	0
19769	12	1	La Tola	49	20	0	1	2008-02-16	2008	0			NEGATIVO	0	0
19858	12	1	La Tola	49	20	0	2	2008-02-16	2008	0			NEGATIVO	0	0
19938	12	1	La Tola	49	20	0	1	2008-02-16	2008	0			NEGATIVO	0	0
19951	14	1	La Tola	49	20	0	1	2008-02-16	2008	0			NEGATIVO	0	0
19768	9	1	La Tola	49	20	0	1	2008-02-17	2008	0			NEGATIVO	0	0
19817	13	1	La Tola	49	20	0	1	2008-02-18	2008	0			NEGATIVO	0	0
19828	7	2	La Tola	49	20	0	1	2008-02-22	2008	0			NEGATIVO	0	0
19786	8	1	La Tola	49	20	0	1	2008-02-22	2008	0			NEGATIVO	0	0
19834	12	1	La Tola	49	20	0	2	2008-02-22	2008	0			NEGATIVO	0	0
19801	13	1	La Tola	49	20	0	1	2008-02-22	2008	0			NEGATIVO	0	0
19932	13	1	La Tola	49	20	0	1	2008-02-22	2008	0			NEGATIVO	0	0
19869	15	1	La Tola	49	20	0	2	2008-02-22	2008	0			NEGATIVO	0	0
19820	10	1	La Tola	49	20	0	2	2008-07-11	2008	0			NEGATIVO	0	0
20454	9	1	Las Penas	52	20	0	1	2006-10-15	2006	0			NEGATIVO	0	0
20541	11	1	Las Penas	52	20	0	1	2006-10-16	2006	0			NEGATIVO	0	0
20415	13	2	Las Penas	52	20	0	2	2006-10-21	2006	0			NEGATIVO	0	0
20445	6	1	Las Penas	52	20	0	2	2006-10-25	2006	0			NEGATIVO	0	0
20470	6	1	Las Penas	52	20	0	2	2006-10-25	2006	0			NEGATIVO	0	0
20440	7	1	Las Penas	52	20	0	1	2006-10-25	2006	0			NEGATIVO	0	0
20463	7	1	Las Penas	52	20	0	1	2006-10-25	2006	0			NEGATIVO	0	0
20497	7	2	Las Penas	52	20	0	2	2006-10-25	2006	0			NEGATIVO	0	0
20508	7	1	Las Penas	52	20	0	1	2006-10-25	2006	0			NEGATIVO	0	0
20521	7	2	Las Penas	52	20	0	2	2006-10-25	2006	0			NEGATIVO	0	0
20409	8	2	Las Penas	52	20	0	1	2006-10-25	2006	0			NEGATIVO	0	0
20435	8	1	Las Penas	52	20	0	1	2006-10-25	2006	0			NEGATIVO	0	0
20448	8	1	Las Penas	52	20	0	2	2006-10-25	2006	0			NEGATIVO	0	0
20453	8	1	Las Penas	52	20	0	1	2006-10-25	2006	0			NEGATIVO	0	0
20460	8	2	Las Penas	52	20	0	2	2006-10-25	2006	0			NEGATIVO	0	0
20466	8	1	Las Penas	52	20	0	1	2006-10-25	2006	0			NEGATIVO	0	0
20469	8	1	Las Penas	52	20	0	1	2006-10-25	2006	0			NEGATIVO	0	0
20477	8	1	Las Penas	52	20	0	2	2006-10-25	2006	0			NEGATIVO	0	0
20482	8	1	Las Penas	52	20	0	2	2006-10-25	2006	0			NEGATIVO	0	0
20491	8	1	Las Penas	52	20	0	2	2006-10-25	2006	0			NEGATIVO	0	0
20423	9	2	Las Penas	52	20	0	2	2006-10-25	2006	0			NEGATIVO	0	0
20429	9	1	Las Penas	52	20	0	1	2006-10-25	2006	0			NEGATIVO	0	0
20433	9	1	Las Penas	52	20	0	1	2006-10-25	2006	0			NEGATIVO	0	0
20434	9	1	Las Penas	52	20	0	1	2006-10-25	2006	0			NEGATIVO	0	0
20446	9	2	Las Penas	52	20	0	1	2006-10-25	2006	0			NEGATIVO	0	0
20467	9	1	Las Penas	52	20	0	1	2006-10-25	2006	0			NEGATIVO	0	0
20468	9	1	Las Penas	52	20	0	1	2006-10-25	2006	0			NEGATIVO	0	0
20487	9	1	Las Penas	52	20	0	2	2006-10-25	2006	0			NEGATIVO	0	0
20492	9	1	Las Penas	52	20	0	1	2006-10-25	2006	0			NEGATIVO	0	0
20496	9	1	Las Penas	52	20	0	2	2006-10-25	2006	0			NEGATIVO	0	0
20408	10	1	Las Penas	52	20	0	2	2006-10-25	2006	0			NEGATIVO	0	0
20417	10	1	Las Penas	52	20	0	2	2006-10-25	2006	0			NEGATIVO	0	0
20430	10	1	Las Penas	52	20	0	2	2006-10-25	2006	0			NEGATIVO	0	0
20475	10	1	Las Penas	52	20	0	1	2006-10-25	2006	0			NEGATIVO	0	0
20486	10	1	Las Penas	52	20	0	2	2006-10-25	2006	0			NEGATIVO	0	0
20498	10	1	Las Penas	52	20	0	2	2006-10-25	2006	0			NEGATIVO	0	0
20504	10	1	Las Penas	52	20	0	2	2006-10-25	2006	0			NEGATIVO	0	0
20505	10	1	Las Penas	52	20	0	2	2006-10-25	2006	0			NEGATIVO	0	0
20519	10	1	Las Penas	52	20	0	2	2006-10-25	2006	0			NEGATIVO	0	0
20420	11	1	Las Penas	52	20	0	2	2006-10-25	2006	0			NEGATIVO	0	0
20437	11	1	Las Penas	52	20	0	2	2006-10-25	2006	0			NEGATIVO	0	0
20450	11	1	Las Penas	52	20	0	1	2006-10-25	2006	0			NEGATIVO	0	0
20465	11	1	Las Penas	52	20	0	1	2006-10-25	2006	0			NEGATIVO	0	0
20495	11	1	Las Penas	52	20	0	1	2006-10-25	2006	0			NEGATIVO	0	0
20499	11	1	Las Penas	52	20	0	2	2006-10-25	2006	0			NEGATIVO	0	0
20500	11	1	Las Penas	52	20	0	2	2006-10-25	2006	0			NEGATIVO	0	0
20520	11	1	Las Penas	52	20	0	1	2006-10-25	2006	0			NEGATIVO	0	0
20414	12	1	Las Penas	52	20	0	1	2006-10-25	2006	0			NEGATIVO	0	0
20416	12	1	Las Penas	52	20	0	2	2006-10-25	2006	0			NEGATIVO	0	0
20438	12	1	Las Penas	52	20	0	2	2006-10-25	2006	0			NEGATIVO	0	0
20442	12	1	Las Penas	52	20	0	2	2006-10-25	2006	0			NEGATIVO	0	0
20444	12	1	Las Penas	52	20	0	1	2006-10-25	2006	0			NEGATIVO	0	0
20488	12	1	Las Penas	52	20	0	1	2006-10-25	2006	0			NEGATIVO	0	0
20501	12	1	Las Penas	52	20	0	2	2006-10-25	2006	0			NEGATIVO	0	0
20503	12	1	Las Penas	52	20	0	2	2006-10-25	2006	0			NEGATIVO	0	0
20506	12	1	Las Penas	52	20	0	2	2006-10-25	2006	1	0	0	NEGATIVO	0	0
20407	13	1	Las Penas	52	20	0	1	2006-10-25	2006	0			NEGATIVO	0	0
20424	13	2	Las Penas	52	20	0	1	2006-10-25	2006	0			NEGATIVO	0	0
20439	13	1	Las Penas	52	20	0	2	2006-10-25	2006	0			NEGATIVO	0	0
20451	13	1	Las Penas	52	20	0	2	2006-10-25	2006	0			NEGATIVO	0	0
20485	13	1	Las Penas	52	20	0	2	2006-10-25	2006	0			NEGATIVO	0	0
20502	13	2	Las Penas	52	20	0	2	2006-10-25	2006	0			NEGATIVO	0	0
20426	14	1	Las Penas	52	20	0	1	2006-10-25	2006	0			NEGATIVO	0	0
20441	14	1	Las Penas	52	20	0	2	2006-10-25	2006	0			NEGATIVO	0	0
20462	14	1	Las Penas	52	20	0	2	2006-10-25	2006	0			NEGATIVO	0	0
20422	15	1	Las Penas	52	20	0	1	2006-10-25	2006	0			NEGATIVO	0	0
20464	15	1	Las Penas	52	20	0	1	2006-10-25	2006	0			NEGATIVO	0	0
20473	15	1	Las Penas	52	20	0	2	2006-10-25	2006	0			NEGATIVO	0	0
20512	15	1	Las Penas	52	20	0	2	2006-10-25	2006	0			NEGATIVO	0	0
20489	7	1	Las Penas	52	20	0	2	2006-10-26	2006	0			NEGATIVO	0	0
20513	7	1	Las Penas	52	20	0	2	2006-10-26	2006	0			NEGATIVO	0	0
20526	7	2	Las Penas	52	20	0	2	2006-10-26	2006	0			NEGATIVO	0	0
20533	7	2	Las Penas	52	20	0	2	2006-10-26	2006	0			NEGATIVO	0	0
20529	8	2	Las Penas	52	20	0	1	2006-10-26	2006	0			NEGATIVO	0	0
20540	8	1	Las Penas	52	20	0	2	2006-10-26	2006	0			NEGATIVO	0	0
20548	8	1	Las Penas	52	20	0	1	2006-10-26	2006	0			NEGATIVO	0	0
20518	9	2	Las Penas	52	20	0	2	2006-10-26	2006	0			NEGATIVO	0	0
20549	9	1	Las Penas	52	20	0	2	2006-10-26	2006	0			NEGATIVO	0	0
20550	9	2	Las Penas	52	20	0	2	2006-10-26	2006	0			NEGATIVO	0	0
20554	9	2	Las Penas	52	20	0	2	2006-10-26	2006	0			NEGATIVO	0	0
20522	10	1	Las Penas	52	20	0	1	2006-10-26	2006	0			NEGATIVO	0	0
20531	10	2	Las Penas	52	20	0	2	2006-10-26	2006	0			NEGATIVO	0	0
20556	10	1	Las Penas	52	20	0	2	2006-10-26	2006	0			NEGATIVO	0	0
20557	10	2	Las Penas	52	20	0	1	2006-10-26	2006	0			NEGATIVO	0	0
20528	10	1	Las Penas	52	20	0	2	2006-10-26	2006	0			NEGATIVO	0	0
20511	11	2	Las Penas	52	20	0	1	2006-10-26	2006	0			NEGATIVO	0	0
20543	11	2	Las Penas	52	20	0	1	2006-10-26	2006	0			NEGATIVO	0	0
20514	12	1	Las Penas	52	20	0	2	2006-10-26	2006	0			NEGATIVO	0	0
20539	12	1	Las Penas	52	20	0	2	2006-10-26	2006	0			NEGATIVO	0	0
20558	12	1	Las Penas	52	20	0	2	2006-10-26	2006	0			NEGATIVO	0	0
20559	12	1	Las Penas	52	20	0	1	2006-10-26	2006	0			NEGATIVO	0	0
20527	13	2	Las Penas	52	20	0	1	2006-10-26	2006	0			NEGATIVO	0	0
20490	14	1	Las Penas	52	20	0	1	2006-10-26	2006	0			NEGATIVO	0	0
20494	14	1	Las Penas	52	20	0	2	2006-10-26	2006	0			NEGATIVO	0	0
20515	14	1	Las Penas	52	20	0	2	2006-10-26	2006	0			NEGATIVO	0	0
20516	14	1	Las Penas	52	20	0	1	2006-10-26	2006	0			NEGATIVO	0	0
20547	14	2	Las Penas	52	20	0	1	2006-10-26	2006	0			NEGATIVO	0	0
20552	14	2	Las Penas	52	20	0	2	2006-10-26	2006	0			NEGATIVO	0	0
20534	15	1	Las Penas	52	20	0	2	2006-10-26	2006	0			NEGATIVO	0	0
20555	15	1	Las Penas	52	20	0	1	2006-10-26	2006	0			NEGATIVO	0	0
20551	15	2	Las Penas	52	20	0	2	2006-10-26	2006	0			NEGATIVO	0	0
20536	15	1	Las Penas	52	20	0	2	2006-10-26	2006	0			NEGATIVO	0	0
20626	13	2	Las Penas	52	20	0	2	2006-11-01	2006	0			NEGATIVO	0	0
20456	7	1	Las Penas	52	20	0	2	2006-11-11	2006	0			NEGATIVO	0	0
20617	7	2	Las Penas	52	20	0	1	2006-11-11	2006	0			NEGATIVO	0	0
20457	8	1	Las Penas	52	20	0	2	2006-11-11	2006	0			NEGATIVO	0	0
20431	9	1	Las Penas	52	20	0	2	2006-11-11	2006	0			NEGATIVO	0	0
20622	9	1	Las Penas	52	20	0	1	2006-11-11	2006	0			NEGATIVO	0	0
20618	10	1	Las Penas	52	20	0	1	2006-11-11	2006	0			NEGATIVO	0	0
20623	10	1	Las Penas	52	20	0	1	2006-11-11	2006	0			NEGATIVO	0	0
20621	11	1	Las Penas	52	20	0	2	2006-11-11	2006	0			NEGATIVO	0	0
20421	12	1	Las Penas	52	20	0	1	2006-11-11	2006	0			NEGATIVO	0	0
20544	12	2	Las Penas	52	20	0	1	2006-11-11	2006	0			NEGATIVO	0	0
20620	14	1	Las Penas	52	20	0	2	2006-11-11	2006	0			NEGATIVO	0	0
20459	7	1	Las Penas	52	20	0	1	2006-11-12	2006	0			NEGATIVO	0	0
20634	8	1	Las Penas	52	20	0	2	2006-11-12	2006	0			NEGATIVO	0	0
20638	8	1	Las Penas	52	20	0	2	2006-11-12	2006	0			NEGATIVO	0	0
20461	9	1	Las Penas	52	20	0	1	2006-11-12	2006	0			NEGATIVO	0	0
20632	9	1	Las Penas	52	20	0	2	2006-11-12	2006	0			NEGATIVO	0	0
20639	9	1	Las Penas	52	20	0	1	2006-11-12	2006	0			NEGATIVO	0	0
20631	9		Las Penas	52	20	0	1	2006-11-12	2006	0			NEGATIVO	0	0
20629	10		Las Penas	52	20	0	2	2006-11-12	2006	0			NEGATIVO	0	0
20633	11	1	Las Penas	52	20	0	2	2006-11-12	2006	0			NEGATIVO	0	0
20637	11	1	Las Penas	52	20	0	1	2006-11-12	2006	0			NEGATIVO	0	0
20493	13	1	Las Penas	52	20	0	2	2006-11-12	2006	0			NEGATIVO	0	0
20636	13	1	Las Penas	52	20	0	2	2006-11-12	2006	0			NEGATIVO	0	0
20635	14	1	Las Penas	52	20	0	1	2006-11-12	2006	0			NEGATIVO	0	0
20630	14		Las Penas	52	20	0	2	2006-11-12	2006	0			NEGATIVO	0	0
20458	15	1	Las Penas	52	20	0	2	2006-11-12	2006	0			NEGATIVO	0	0
20517	7	2	Las Penas	52	20	0	1	2006-11-13	2006	0			NEGATIVO	0	0
20653	7		Las Penas	52	20	0	2	2006-11-13	2006	0			NEGATIVO	0	0
20412	8	1	Las Penas	52	20	0	1	2006-11-13	2006	0			NEGATIVO	0	0
20471	8	2	Las Penas	52	20	0	2	2006-11-13	2006	0			NEGATIVO	0	0
20619	9	2	Las Penas	52	20	0	2	2006-11-13	2006	0			NEGATIVO	0	0
20641	9	2	Las Penas	52	20	0	2	2006-11-13	2006	0			NEGATIVO	0	0
20646	9	1	Las Penas	52	20	0	2	2006-11-13	2006	0			NEGATIVO	0	0
20648	9	1	Las Penas	52	20	0	2	2006-11-13	2006	0			NEGATIVO	0	0
20652	9	1	Las Penas	52	20	0	1	2006-11-13	2006	0			NEGATIVO	0	0
20649	10	1	Las Penas	52	20	0	1	2006-11-13	2006	0			NEGATIVO	0	0
20643	11	1	Las Penas	52	20	0	2	2006-11-13	2006	0			NEGATIVO	0	0
20645	11	1	Las Penas	52	20	0	2	2006-11-13	2006	0			NEGATIVO	0	0
20640	12	1	Las Penas	52	20	0	1	2006-11-13	2006	0			NEGATIVO	0	0
20523	13	1	Las Penas	52	20	0	1	2006-11-13	2006	0			NEGATIVO	0	0
20627	13	2	Las Penas	52	20	0	2	2006-11-13	2006	0			NEGATIVO	0	0
20647	13	1	Las Penas	52	20	0	1	2006-11-13	2006	0			NEGATIVO	0	0
20411	14	1	Las Penas	52	20	0	2	2006-11-13	2006	0			NEGATIVO	0	0
20432	14	2	Las Penas	52	20	0	1	2006-11-13	2006	0			NEGATIVO	0	0
20542	14	1	Las Penas	52	20	0	1	2006-11-13	2006	0			NEGATIVO	0	0
20644	15	1	Las Penas	52	20	0	2	2006-11-13	2006	0			NEGATIVO	0	0
20650	15	1	Las Penas	52	20	0	2	2006-11-15	2006	0			NEGATIVO	0	0
20537	10	1	Las Penas	52	20	0	1	2008-02-03	2008	0			NEGATIVO	0	0
20479	7	2	Las Penas	52	20	0	1	2008-02-08	2008	0			NEGATIVO	0	0
20425	8	1	Las Penas	52	20	0	1	2008-02-08	2008	0			NEGATIVO	0	0
20413	9	1	Las Penas	52	20	0	2	2008-02-08	2008	0			NEGATIVO	0	0
20427	9	1	Las Penas	52	20	0	1	2008-02-09	2008	0			NEGATIVO	0	0
20642	10	1	Las Penas	52	20	0	2	2008-02-09	2008	0			NEGATIVO	0	0
20507	11	1	Las Penas	52	20	0	1	2008-02-09	2008	0			NEGATIVO	0	0
20560	11	2	Las Penas	52	20	0	2	2008-02-09	2008	0			NEGATIVO	0	0
20538	12	1	Las Penas	52	20	0	1	2008-02-09	2008	0			NEGATIVO	0	0
20410	13	1	Las Penas	52	20	0	1	2008-02-09	2008	0			NEGATIVO	0	0
20452	13	1	Las Penas	52	20	0	1	2008-02-09	2008	0			NEGATIVO	0	0
20474	13	1	Las Penas	52	20	0	1	2008-02-09	2008	0			NEGATIVO	0	0
20481	15	2	Las Penas	52	20	0	2	2008-02-09	2008	0			NEGATIVO	0	0
20654	15	1	Las Penas	52	20	0	2	2008-02-09	2008	0			NEGATIVO	0	0
20484	9	1	Las Penas	52	20	0	1	2008-02-10	2008	0			NEGATIVO	0	0
20436	10	1	Las Penas	52	20	0	1	2008-02-10	2008	0			NEGATIVO	0	0
20447	10	1	Las Penas	52	20	0	1	2008-02-10	2008	0			NEGATIVO	0	0
20658	14	2	Las Penas	52	20	0	2	2008-02-10	2008	0			NEGATIVO	0	0
20657	14	2	Las Penas	52	20	0	2	2008-02-10	2008	0			NEGATIVO	0	0
20419	7	1	Las Penas	52	20	0	1	2008-02-11	2008	0			NEGATIVO	0	0
20510	13	2	Las Penas	52	20	0	2	2008-02-11	2008	0			NEGATIVO	0	0
20655	14	1	Las Penas	52	20	0	1	2008-02-11	2008	0			NEGATIVO	0	0
20579	7	1	Molinita	56	20	0	1	2006-10-19	2006	0			NEGATIVO	0	0
20580	6	1	Molinita	56	20	0	1	2006-10-28	2006	0			NEGATIVO	0	0
20561	7	1	Molinita	56	20	0	2	2006-10-28	2006	0			NEGATIVO	0	0
20588	7	2	Molinita	56	20	0	2	2006-10-28	2006	0			NEGATIVO	0	0
20601	7	2	Molinita	56	20	0	2	2006-10-28	2006	0			NEGATIVO	0	0
20609	7	2	Molinita	56	20	0	2	2006-10-28	2006	0			NEGATIVO	0	0
20610	7	1	Molinita	56	20	0	1	2006-10-28	2006	0			NEGATIVO	0	0
20573	7	1	Molinita	56	20	0	2	2006-10-28	2006	0			NEGATIVO	0	0
20592	8	1	Molinita	56	20	0	1	2006-10-28	2006	0			NEGATIVO	0	0
20566	8	1	Molinita	56	20	0	1	2006-10-28	2006	0			NEGATIVO	0	0
20563	9	1	Molinita	56	20	0	2	2006-10-28	2006	0			NEGATIVO	0	0
20576	9	2	Molinita	56	20	0	1	2006-10-28	2006	0			NEGATIVO	0	0
20578	9	1	Molinita	56	20	0	2	2006-10-28	2006	0			NEGATIVO	0	0
20582	9	1	Molinita	56	20	0	2	2006-10-28	2006	0			NEGATIVO	0	0
20595	9	2	Molinita	56	20	0	1	2006-10-28	2006	0			NEGATIVO	0	0
20577	10	1	Molinita	56	20	0	1	2006-10-28	2006	0			NEGATIVO	0	0
20581	10	1	Molinita	56	20	0	2	2006-10-28	2006	0			NEGATIVO	0	0
20587	10	1	Molinita	56	20	0	2	2006-10-28	2006	0			NEGATIVO	0	0
20596	10	2	Molinita	56	20	0	1	2006-10-28	2006	0			NEGATIVO	0	0
20608	10		Molinita	56	20	0	2	2006-10-28	2006	0			NEGATIVO	0	0
20567	10	1	Molinita	56	20	0	2	2006-10-28	2006	0			NEGATIVO	0	0
20594	11		Molinita	56	20	0	1	2006-10-28	2006	0			NEGATIVO	0	0
20597	11	2	Molinita	56	20	0	2	2006-10-28	2006	0			NEGATIVO	0	0
20605	11	1	Molinita	56	20	0	2	2006-10-28	2006	0			NEGATIVO	0	0
20564	11	1	Molinita	56	20	0	1	2006-10-28	2006	0			NEGATIVO	0	0
20565	11	1	Molinita	56	20	0	1	2006-10-28	2006	0			NEGATIVO	0	0
20570	11	1	Molinita	56	20	0	1	2006-10-28	2006	0			NEGATIVO	0	0
20571	11	1	Molinita	56	20	0	1	2006-10-28	2006	0			NEGATIVO	0	0
20604	11	1	Molinita	56	20	0	1	2006-10-28	2006	0			NEGATIVO	0	0
20589	12	1	Molinita	56	20	0	1	2006-10-28	2006	0			NEGATIVO	0	0
20593	12	2	Molinita	56	20	0	2	2006-10-28	2006	0			NEGATIVO	0	0
20598	12	2	Molinita	56	20	0	2	2006-10-28	2006	0			NEGATIVO	0	0
20603	12	1	Molinita	56	20	0	2	2006-10-28	2006	0			NEGATIVO	0	0
20612	12	1	Molinita	56	20	0	1	2006-10-28	2006	0			NEGATIVO	0	0
20569	12	2	Molinita	56	20	0	1	2006-10-28	2006	0			NEGATIVO	0	0
20575	12	1	Molinita	56	20	0	1	2006-10-28	2006	0			NEGATIVO	0	0
20583	13	1	Molinita	56	20	0	1	2006-10-28	2006	0			NEGATIVO	0	0
20586	13	1	Molinita	56	20	0	2	2006-10-28	2006	0			NEGATIVO	0	0
20611	13	1	Molinita	56	20	0	2	2006-10-28	2006	0			NEGATIVO	0	0
20585	14	1	Molinita	56	20	0	1	2006-10-28	2006	0			NEGATIVO	0	0
20602	14	2	Molinita	56	20	0	2	2006-10-28	2006	0			NEGATIVO	0	0
20607	14	1	Molinita	56	20	0	2	2006-10-28	2006	0			NEGATIVO	0	0
20572	14	1	Molinita	56	20	0	2	2006-10-28	2006	0			NEGATIVO	0	0
20568	14	1	Molinita	56	20	0	1	2006-10-28	2006	0			NEGATIVO	0	0
20599	15	1	Molinita	56	20	0	1	2006-10-28	2006	0			NEGATIVO	0	0
20613	15	2	Molinita	56	20	0	2	2006-10-28	2006	0			NEGATIVO	0	0
20616	15		Molinita	56	20	0	1	2006-10-28	2006	0			NEGATIVO	0	0
20591	15	1	Molinita	56	20	0	2	2006-10-28	2006	0			NEGATIVO	0	0
20574	15	1	Molinita	56	20	0	2	2006-10-28	2006	0			NEGATIVO	0	0
20615	11	2	Molinita	56	20	0	1	2006-10-29	2006	0			NEGATIVO	0	0
20614	13	2	Molinita	56	20	0	1	2006-10-29	2006	0			NEGATIVO	0	0
20600	14	2	Molinita	56	20	0	2	2006-10-29	2006	0			NEGATIVO	0	0
20584	8	1	Molinita	56	20	0	2	2007-12-09	2007	0			NEGATIVO	0	0
20606	9	2	Molinita	56	20	0	1	2007-12-09	2007	0			NEGATIVO	0	0
20562	13	1	Molinita	56	20	0	1	2007-12-09	2007	0			NEGATIVO	0	0
20027	10	3	Olmedo	57	20	0	2	2006-08-10	2006	0			NEGATIVO	0	0
20011	11	1	Olmedo	57	20	0	2	2006-08-11	2006	0			NEGATIVO	0	0
20002	9	1	Olmedo	57	20	0	1	2006-08-12	2006	0			NEGATIVO	0	0
19989	12	1	Olmedo	57	20	0	1	2006-08-12	2006	0			NEGATIVO	0	0
19988	7	1	Olmedo	57	20	0	1	2006-08-14	2006	0			NEGATIVO	0	0
19995	8	1	Olmedo	57	20	0	2	2006-08-14	2006	0			NEGATIVO	0	0
19998	8	1	Olmedo	57	20	0	2	2006-08-14	2006	0			NEGATIVO	0	0
19991	9	1	Olmedo	57	20	0	1	2006-08-14	2006	0			NEGATIVO	0	0
19992	9	1	Olmedo	57	20	0	1	2006-08-14	2006	0			NEGATIVO	0	0
19993	10	1	Olmedo	57	20	0	2	2006-08-14	2006	0			NEGATIVO	0	0
19996	10	1	Olmedo	57	20	0	2	2006-08-14	2006	0			NEGATIVO	0	0
20000	10	1	Olmedo	57	20	0	1	2006-08-14	2006	0			NEGATIVO	0	0
19994	12	1	Olmedo	57	20	0	1	2006-08-14	2006	0			NEGATIVO	0	0
19997	13	1	Olmedo	57	20	0	2	2006-08-14	2006	0			NEGATIVO	0	0
20022	6	1	Olmedo	57	20	0	2	2006-08-15	2006	0			NEGATIVO	0	0
20008	7	1	Olmedo	57	20	0	2	2006-08-15	2006	0			NEGATIVO	0	0
20012	7	1	Olmedo	57	20	0	1	2006-08-15	2006	0			NEGATIVO	0	0
20018	8	1	Olmedo	57	20	0	2	2006-08-15	2006	0			NEGATIVO	0	0
20023	10	1	Olmedo	57	20	0	1	2006-08-15	2006	0			NEGATIVO	0	0
20007	11	1	Olmedo	57	20	0	1	2006-08-15	2006	0			NEGATIVO	0	0
20010	12	1	Olmedo	57	20	0	2	2006-08-15	2006	0			NEGATIVO	0	0
20015	12	1	Olmedo	57	20	0	1	2006-08-15	2006	0			NEGATIVO	0	0
20019	13	1	Olmedo	57	20	0	2	2006-08-15	2006	0			NEGATIVO	0	0
20009	14	1	Olmedo	57	20	0	1	2006-08-15	2006	0			NEGATIVO	0	0
20013	15	1	Olmedo	57	20	0	1	2006-08-15	2006	0			NEGATIVO	0	0
20017	15	1	Olmedo	57	20	0	2	2006-08-15	2006	0			NEGATIVO	0	0
20026	7	1	Olmedo	57	20	0	2	2006-08-16	2006	0			NEGATIVO	0	0
20028	7	1	Olmedo	57	20	0	2	2006-08-16	2006	0			NEGATIVO	0	0
20025	9	1	Olmedo	57	20	0	2	2006-08-16	2006	0			NEGATIVO	0	0
20030	12	1	Olmedo	57	20	0	1	2006-08-16	2006	0			NEGATIVO	0	0
20029	14	1	Olmedo	57	20	0	1	2006-08-16	2006	0			NEGATIVO	0	0
20034	9	1	Olmedo	57	20	0	1	2006-08-17	2006	0			NEGATIVO	0	0
20032	11	1	Olmedo	57	20	0	1	2006-08-17	2006	0			NEGATIVO	0	0
20033	14	1	Olmedo	57	20	0	1	2006-08-17	2006	0			NEGATIVO	0	0
20036	13	1	Olmedo	57	20	0	1	2006-08-18	2006	0			NEGATIVO	0	0
20035	15	1	Olmedo	57	20	0	1	2006-08-18	2006	0			NEGATIVO	0	0
20001	8	1	Olmedo	57	20	0	2	2008-07-16	2008	0			NEGATIVO	0	0
19990	9	1	Olmedo	57	20	0	2	2008-07-16	2008	0			NEGATIVO	0	0
20004	9	1	Olmedo	57	20	0	1	2008-07-16	2008	0			NEGATIVO	0	0
20020	11	1	Olmedo	57	20	0	1	2008-07-16	2008	0			NEGATIVO	0	0
20006	13	1	Olmedo	57	20	0	1	2008-07-16	2008	0			NEGATIVO	0	0
20031	13	1	Olmedo	57	20	0	1	2008-07-16	2008	0			NEGATIVO	0	0
20346	15	1	Rompido	62	20	0	1	2005-12-04	2005	0			NEGATIVO	0	0
20343	15	1	Rompido	62	20	0	1	2006-10-12	2006	0			NEGATIVO	0	0
20324	14	1	Rompido	62	20	0	1	2006-10-15	2006	0			NEGATIVO	0	0
20371	6	1	Rompido	62	20	0	2	2006-10-18	2006	0			NEGATIVO	0	0
20306	7	1	Rompido	62	20	0	1	2006-10-18	2006	0			NEGATIVO	0	0
20315	7	1	Rompido	62	20	0	1	2006-10-18	2006	0			NEGATIVO	0	0
20318	7	1	Rompido	62	20	0	1	2006-10-18	2006	0			NEGATIVO	0	0
20338	7	1	Rompido	62	20	0	2	2006-10-18	2006	0			NEGATIVO	0	0
20358	7	1	Rompido	62	20	0	1	2006-10-18	2006	0			NEGATIVO	0	0
20360	7	1	Rompido	62	20	0	1	2006-10-18	2006	0			NEGATIVO	0	0
20365	7	1	Rompido	62	20	0	1	2006-10-18	2006	0			NEGATIVO	0	0
20374	7	1	Rompido	62	20	0	2	2006-10-18	2006	0			NEGATIVO	0	0
20311	8	1	Rompido	62	20	0	2	2006-10-18	2006	0			NEGATIVO	0	0
20326	8	1	Rompido	62	20	0	2	2006-10-18	2006	0			NEGATIVO	0	0
20335	8	1	Rompido	62	20	0	2	2006-10-18	2006	0			NEGATIVO	0	0
20353	8	1	Rompido	62	20	0	2	2006-10-18	2006	0			NEGATIVO	0	0
20355	8	1	Rompido	62	20	0	1	2006-10-18	2006	0			NEGATIVO	0	0
20361	8	1	Rompido	62	20	0	2	2006-10-18	2006	0			NEGATIVO	0	0
20376	8	1	Rompido	62	20	0	2	2006-10-18	2006	0			NEGATIVO	0	0
20305	9	1	Rompido	62	20	0	1	2006-10-18	2006	0			NEGATIVO	0	0
20308	9	1	Rompido	62	20	0	2	2006-10-18	2006	0			NEGATIVO	0	0
20314	9	1	Rompido	62	20	0	1	2006-10-18	2006	0			NEGATIVO	0	0
20320	9	2	Rompido	62	20	0	1	2006-10-18	2006	0			NEGATIVO	0	0
20321	9	1	Rompido	62	20	0	1	2006-10-18	2006	0			NEGATIVO	0	0
20351	9	1	Rompido	62	20	0	2	2006-10-18	2006	0			NEGATIVO	0	0
20370	9	1	Rompido	62	20	0	2	2006-10-18	2006	0			NEGATIVO	0	0
20375	9	1	Rompido	62	20	0	2	2006-10-18	2006	0			NEGATIVO	0	0
20300	10	1	Rompido	62	20	0	1	2006-10-18	2006	0			NEGATIVO	0	0
20301	10	1	Rompido	62	20	0	2	2006-10-18	2006	0			NEGATIVO	0	0
20303	10	1	Rompido	62	20	0	1	2006-10-18	2006	0			NEGATIVO	0	0
20322	10	1	Rompido	62	20	0	1	2006-10-18	2006	0			NEGATIVO	0	0
20327	10	1	Rompido	62	20	0	2	2006-10-18	2006	0			NEGATIVO	0	0
20329	10	1	Rompido	62	20	0	2	2006-10-18	2006	0			NEGATIVO	0	0
20331	10	1	Rompido	62	20	0	2	2006-10-18	2006	0			NEGATIVO	0	0
20337	10	1	Rompido	62	20	0	1	2006-10-18	2006	0			NEGATIVO	0	0
20348	10	1	Rompido	62	20	0	2	2006-10-18	2006	0			NEGATIVO	0	0
20350	10	1	Rompido	62	20	0	1	2006-10-18	2006	0			NEGATIVO	0	0
20367	10	1	Rompido	62	20	0	1	2006-10-18	2006	0			NEGATIVO	0	0
20379	10	1	Rompido	62	20	0	1	2006-10-18	2006	0			NEGATIVO	0	0
20304	11	1	Rompido	62	20	0	2	2006-10-18	2006	0			NEGATIVO	0	0
20307	11	1	Rompido	62	20	0	2	2006-10-18	2006	0			NEGATIVO	0	0
20316	11	1	Rompido	62	20	0	1	2006-10-18	2006	0			NEGATIVO	0	0
20362	11	1	Rompido	62	20	0	1	2006-10-18	2006	0			NEGATIVO	0	0
20368	11	1	Rompido	62	20	0	2	2006-10-18	2006	0			NEGATIVO	0	0
20373	11	1	Rompido	62	20	0	1	2006-10-18	2006	0			NEGATIVO	0	0
20310	12	1	Rompido	62	20	0	1	2006-10-18	2006	0			NEGATIVO	0	0
20328	12	1	Rompido	62	20	0	1	2006-10-18	2006	0			NEGATIVO	0	0
20330	12	1	Rompido	62	20	0	1	2006-10-18	2006	0			NEGATIVO	0	0
20344	12	2	Rompido	62	20	0	1	2006-10-18	2006	0			NEGATIVO	0	0
20352	12	1	Rompido	62	20	0	1	2006-10-18	2006	0			NEGATIVO	0	0
20356	12	1	Rompido	62	20	0	1	2006-10-18	2006	0			NEGATIVO	0	0
20366	12	2	Rompido	62	20	0	2	2006-10-18	2006	0			NEGATIVO	0	0
20378	12	1	Rompido	62	20	0	2	2006-10-18	2006	0			NEGATIVO	0	0
20302	13	1	Rompido	62	20	0	1	2006-10-18	2006	0			NEGATIVO	0	0
20309	13	1	Rompido	62	20	0	2	2006-10-18	2006	0			NEGATIVO	0	0
20325	13	1	Rompido	62	20	0	2	2006-10-18	2006	0			NEGATIVO	0	0
20336	13	1	Rompido	62	20	0	2	2006-10-18	2006	0			NEGATIVO	0	0
20345	13	1	Rompido	62	20	0	1	2006-10-18	2006	0			NEGATIVO	0	0
20347	13	1	Rompido	62	20	0	1	2006-10-18	2006	0			NEGATIVO	0	0
20349	13	1	Rompido	62	20	0	2	2006-10-18	2006	0			NEGATIVO	0	0
20354	13	1	Rompido	62	20	0	2	2006-10-18	2006	0			NEGATIVO	0	0
20377	14	1	Rompido	62	20	0	2	2006-10-18	2006	0			NEGATIVO	0	0
20334	15	1	Rompido	62	20	0	1	2006-10-18	2006	0			NEGATIVO	0	0
20364	15	1	Rompido	62	20	0	2	2006-10-18	2006	0			NEGATIVO	0	0
20380	13	1	Rompido	62	20	0	2	2006-10-19	2006	1	0	1	NEGATIVO	0	0
20381	6	1	Rompido	62	20	0	1	2006-10-19	2006	0			NEGATIVO	0	0
20382	7	1	Rompido	62	20	0	1	2006-10-19	2006	0			NEGATIVO	0	0
20396	7	1	Rompido	62	20	0	1	2006-10-19	2006	0			NEGATIVO	0	0
20397	7	1	Rompido	62	20	0	1	2006-10-19	2006	0			NEGATIVO	0	0
20383	8	1	Rompido	62	20	0	1	2006-10-19	2006	0			NEGATIVO	0	0
20393	8	1	Rompido	62	20	0	1	2006-10-19	2006	0			NEGATIVO	0	0
20398	8	1	Rompido	62	20	0	2	2006-10-19	2006	0			NEGATIVO	0	0
20395	10	1	Rompido	62	20	0	1	2006-10-19	2006	0			NEGATIVO	0	0
20384	11	1	Rompido	62	20	0	2	2006-10-19	2006	0			NEGATIVO	0	0
20392	12	1	Rompido	62	20	0	1	2006-10-19	2006	0			NEGATIVO	0	0
20386	13	1	Rompido	62	20	0	1	2006-10-19	2006	0			NEGATIVO	0	0
20389	13	1	Rompido	62	20	0	2	2006-10-19	2006	0			NEGATIVO	0	0
20391	14	1	Rompido	62	20	0	1	2006-10-19	2006	0			NEGATIVO	0	0
20385	15	1	Rompido	62	20	0	1	2006-10-19	2006	0			NEGATIVO	0	0
20388	15	1	Rompido	62	20	0	1	2006-10-19	2006	0			NEGATIVO	0	0
20394	15	1	Rompido	62	20	0	2	2006-10-19	2006	0			NEGATIVO	0	0
20400	8	1	Rompido	62	20	0	2	2006-10-20	2006	0			NEGATIVO	0	0
20404	9	1	Rompido	62	20	0	1	2006-10-20	2006	0			NEGATIVO	0	0
20402	12	1	Rompido	62	20	0	1	2006-10-20	2006	0			NEGATIVO	0	0
20403	13	1	Rompido	62	20	0	2	2006-10-20	2006	0			NEGATIVO	0	0
20406	13	1	Rompido	62	20	0	2	2006-10-21	2006	0			NEGATIVO	0	0
20405	15	1	Rompido	62	20	0	1	2006-10-25	2006	1	1	1	ACTIVE	1	2
20369	8	1	Rompido	62	20	0	2	2007-01-12	2007	0			NEGATIVO	0	0
20313	7	1	Rompido	62	20	0	1	2007-12-04	2007	1	0	0	NEGATIVO	0	0
20339	7	1	Rompido	62	20	0	2	2007-12-04	2007	0			NEGATIVO	0	0
20342	7	1	Rompido	62	20	0	1	2007-12-04	2007	0			NEGATIVO	0	0
20312	8	1	Rompido	62	20	0	2	2007-12-04	2007	0			NEGATIVO	0	0
20323	8	1	Rompido	62	20	0	2	2007-12-04	2007	0			NEGATIVO	0	0
20359	8	1	Rompido	62	20	0	1	2007-12-04	2007	0			NEGATIVO	0	0
20317	9	1	Rompido	62	20	0	1	2007-12-04	2007	0			NEGATIVO	0	0
20319	10	1	Rompido	62	20	0	2	2007-12-04	2007	0			NEGATIVO	0	0
20333	10	1	Rompido	62	20	0	2	2007-12-04	2007	0			NEGATIVO	0	0
20340	10	1	Rompido	62	20	0	2	2007-12-04	2007	0			NEGATIVO	0	0
20357	10	1	Rompido	62	20	0	2	2007-12-04	2007	0			NEGATIVO	0	0
20401	10	1	Rompido	62	20	0	1	2007-12-04	2007	0			NEGATIVO	0	0
20332	12	1	Rompido	62	20	0	1	2007-12-04	2007	0			NEGATIVO	0	0
20363	13	1	Rompido	62	20	0	1	2007-12-04	2007	0			NEGATIVO	0	0
20372	14	1	Rompido	62	20	0	1	2007-12-04	2007	0			NEGATIVO	0	0
20390	15	1	Rompido	62	20	0	1	2007-12-04	2007	0			NEGATIVO	0	0
20341	15	1	Rompido	62	20	0	1	2007-12-06	2007	0			NEGATIVO	0	0
7030	8	1	Rosa Zarate	63	20	0	1	2014-05-30	2014	0			NEGATIVO	0	0
20038	15	1	Santa Lucia	67	20	0	1	2006-06-19	2006	0			NEGATIVO	0	0
20043	8	1	Santa Lucia	67	20	0	1	2006-08-18	2006	0			NEGATIVO	0	0
20045	9	1	Santa Lucia	67	20	0	1	2006-08-18	2006	0			NEGATIVO	0	0
20046	10	1	Santa Lucia	67	20	0	2	2006-08-18	2006	0			NEGATIVO	0	0
20042	14	1	Santa Lucia	67	20	0	2	2006-08-18	2006	0			NEGATIVO	0	0
20044	14	1	Santa Lucia	67	20	0	1	2006-08-18	2006	0			NEGATIVO	0	0
20041	7	1	Santa Lucia	67	20	0	2	2006-08-19	2006	0			NEGATIVO	0	0
20039	8	1	Santa Lucia	67	20	0	1	2006-08-19	2006	0			NEGATIVO	0	0
20050	8	1	Santa Lucia	67	20	0	1	2006-08-19	2006	0			NEGATIVO	0	0
20049	9	1	Santa Lucia	67	20	0	2	2006-08-19	2006	0			NEGATIVO	0	0
20056	9	1	Santa Lucia	67	20	0	2	2006-08-19	2006	0			NEGATIVO	0	0
20040	10	1	Santa Lucia	67	20	0	2	2006-08-19	2006	0			NEGATIVO	0	0
20058	10	1	Santa Lucia	67	20	0	2	2006-08-19	2006	0			NEGATIVO	0	0
20047	11	1	Santa Lucia	67	20	0	1	2006-08-19	2006	0			NEGATIVO	0	0
20037	12	1	Santa Lucia	67	20	0	2	2006-08-19	2006	0			NEGATIVO	0	0
20052	12	1	Santa Lucia	67	20	0	2	2006-08-19	2006	0			NEGATIVO	0	0
20054	12	1	Santa Lucia	67	20	0	2	2006-08-19	2006	0			NEGATIVO	0	0
20057	12	1	Santa Lucia	67	20	0	2	2006-08-19	2006	0			NEGATIVO	0	0
20059	12	1	Santa Lucia	67	20	0	1	2006-08-19	2006	0			NEGATIVO	0	0
20048	13	1	Santa Lucia	67	20	0	2	2006-08-19	2006	0			NEGATIVO	0	0
20060	13	1	Santa Lucia	67	20	0	1	2006-08-19	2006	0			NEGATIVO	0	0
20063	9	1	Santa Lucia	67	20	0	1	2006-08-20	2006	0			NEGATIVO	0	0
20062	10	1	Santa Lucia	67	20	0	1	2006-08-20	2006	0			NEGATIVO	0	0
20051	12	1	Santa Lucia	67	20	0	2	2008-07-12	2008	0			NEGATIVO	0	0
20053	7	1	Santa Lucia	67	20	0	1	2008-07-16	2008	0			NEGATIVO	0	0
20055	7	1	Santa Lucia	67	20	0	1	2008-07-16	2008	0			NEGATIVO	0	0
20061	11	1	Santa Lucia	67	20	0	2	2008-07-16	2008	0			NEGATIVO	0	0
20771	12	1	Santa Rosa	69	20	0	1	2006-11-17	2006	1	1	1	ACTIVE	1	2
20773	7	1	Santa Rosa	69	20	0	2	2006-11-17	2006	0			NEGATIVO	0	0
20783	7	1	Santa Rosa	69	20	0	2	2006-11-17	2006	0			NEGATIVO	0	0
20760	8	1	Santa Rosa	69	20	0	1	2006-11-17	2006	0			NEGATIVO	0	0
20761	8	1	Santa Rosa	69	20	0	2	2006-11-17	2006	0			NEGATIVO	0	0
20777	8	1	Santa Rosa	69	20	0	2	2006-11-17	2006	0			NEGATIVO	0	0
20782	9	1	Santa Rosa	69	20	0	1	2006-11-17	2006	0			NEGATIVO	0	0
20793	9	1	Santa Rosa	69	20	0	1	2006-11-17	2006	0			NEGATIVO	0	0
20764	10	1	Santa Rosa	69	20	0	2	2006-11-17	2006	0			NEGATIVO	0	0
20770	10	1	Santa Rosa	69	20	0	2	2006-11-17	2006	0			NEGATIVO	0	0
20774	10	1	Santa Rosa	69	20	0	2	2006-11-17	2006	0			NEGATIVO	0	0
20792	10	1	Santa Rosa	69	20	0	1	2006-11-17	2006	0			NEGATIVO	0	0
20768	11	1	Santa Rosa	69	20	0	2	2006-11-17	2006	0			NEGATIVO	0	0
20778	11	1	Santa Rosa	69	20	0	1	2006-11-17	2006	0			NEGATIVO	0	0
20781	11	1	Santa Rosa	69	20	0	2	2006-11-17	2006	0			NEGATIVO	0	0
20786	11	1	Santa Rosa	69	20	0	2	2006-11-17	2006	0			NEGATIVO	0	0
20767	12	1	Santa Rosa	69	20	0	1	2006-11-17	2006	0			NEGATIVO	0	0
20791	12	1	Santa Rosa	69	20	0	2	2006-11-17	2006	0			NEGATIVO	0	0
20766	12	1	Santa Rosa	69	20	0	1	2006-11-17	2006	0			NEGATIVO	0	0
20769	13	1	Santa Rosa	69	20	0	2	2006-11-17	2006	0			NEGATIVO	0	0
20776	13	1	Santa Rosa	69	20	0	2	2006-11-17	2006	0			NEGATIVO	0	0
20784	13	1	Santa Rosa	69	20	0	2	2006-11-17	2006	0			NEGATIVO	0	0
20802	15	1	Santa Rosa	69	20	0	2	2006-11-17	2006	0			NEGATIVO	0	0
20759	12	1	Santa Rosa	69	20	0	2	2006-11-17	2006	1	1	0	TREATED	1	1
20812	14	1	Santa Rosa	69	20	0	1	2006-11-18	2006	1	1	0	TREATED	1	1
20775	7	1	Santa Rosa	69	20	0	2	2006-11-19	2006	0			NEGATIVO	0	0
20795	7	1	Santa Rosa	69	20	0	2	2006-11-19	2006	0			NEGATIVO	0	0
20804	7	1	Santa Rosa	69	20	0	1	2006-11-19	2006	0			NEGATIVO	0	0
20796	8	1	Santa Rosa	69	20	0	1	2006-11-19	2006	0			NEGATIVO	0	0
20789	9	1	Santa Rosa	69	20	0	2	2006-11-19	2006	0			NEGATIVO	0	0
20798	9	1	Santa Rosa	69	20	0	1	2006-11-19	2006	0			NEGATIVO	0	0
20803	9	1	Santa Rosa	69	20	0	1	2006-11-19	2006	0			NEGATIVO	0	0
20785	10	1	Santa Rosa	69	20	0	1	2006-11-19	2006	0			NEGATIVO	0	0
20788	10	1	Santa Rosa	69	20	0	2	2006-11-19	2006	0			NEGATIVO	0	0
20794	10	1	Santa Rosa	69	20	0	1	2006-11-19	2006	0			NEGATIVO	0	0
20797	11	1	Santa Rosa	69	20	0	1	2006-11-19	2006	0			NEGATIVO	0	0
20790	12	1	Santa Rosa	69	20	0	2	2006-11-19	2006	0			NEGATIVO	0	0
20807	12	1	Santa Rosa	69	20	0	2	2006-11-19	2006	0			NEGATIVO	0	0
20813	12	1	Santa Rosa	69	20	0	1	2006-11-19	2006	0			NEGATIVO	0	0
20799	13	1	Santa Rosa	69	20	0	1	2006-11-19	2006	0			NEGATIVO	0	0
20805	14	1	Santa Rosa	69	20	0	1	2006-11-19	2006	0			NEGATIVO	0	0
20806	15	1	Santa Rosa	69	20	0	1	2006-11-19	2006	0			NEGATIVO	0	0
20763	7	1	Santa Rosa	69	20	0	1	2006-11-20	2006	0			NEGATIVO	0	0
20811	7	1	Santa Rosa	69	20	0	2	2006-11-20	2006	0			NEGATIVO	0	0
20823	7	1	Santa Rosa	69	20	0	2	2006-11-20	2006	0			NEGATIVO	0	0
20815	8	1	Santa Rosa	69	20	0	1	2006-11-20	2006	0			NEGATIVO	0	0
20808	9	1	Santa Rosa	69	20	0	2	2006-11-20	2006	0			NEGATIVO	0	0
20816	9	1	Santa Rosa	69	20	0	1	2006-11-20	2006	0			NEGATIVO	0	0
20822	9	1	Santa Rosa	69	20	0	2	2006-11-20	2006	0			NEGATIVO	0	0
20762	10	1	Santa Rosa	69	20	0	1	2006-11-20	2006	0			NEGATIVO	0	0
20819	12	1	Santa Rosa	69	20	0	2	2006-11-20	2006	0			NEGATIVO	0	0
20820	14	1	Santa Rosa	69	20	0	2	2006-11-20	2006	0			NEGATIVO	0	0
20818	15	1	Santa Rosa	69	20	0	2	2006-11-20	2006	0			NEGATIVO	0	0
20765	7	1	Santa Rosa	69	20	0	1	2008-04-21	2008	0			NEGATIVO	0	0
20800	7	1	Santa Rosa	69	20	0	1	2008-04-21	2008	0			NEGATIVO	0	0
20787	11	1	Santa Rosa	69	20	0	1	2008-04-21	2008	0			NEGATIVO	0	0
20780	12	1	Santa Rosa	69	20	0	2	2008-04-21	2008	0			NEGATIVO	0	0
20801	12	1	Santa Rosa	69	20	0	1	2008-04-21	2008	0			NEGATIVO	0	0
20821	12	1	Santa Rosa	69	20	0	2	2008-04-21	2008	0			NEGATIVO	0	0
20814	15	1	Santa Rosa	69	20	0	1	2008-04-21	2008	0			NEGATIVO	0	0
19473	7	1	Tolita Pampa De Oro	71	20	0	1	2005-05-22	2005	0			NEGATIVO	0	0
19419	13	1	Tolita Pampa De Oro	71	20	0	1	2006-05-21	2006	0			NEGATIVO	0	0
19421	14	1	Tolita Pampa De Oro	71	20	0	2	2006-05-21	2006	0			NEGATIVO	0	0
19418	15	1	Tolita Pampa De Oro	71	20	0	1	2006-05-21	2006	0			NEGATIVO	0	0
19411	7	1	Tolita Pampa De Oro	71	20	0	2	2006-05-22	2006	0			NEGATIVO	0	0
19435	7	1	Tolita Pampa De Oro	71	20	0	1	2006-05-22	2006	0			NEGATIVO	0	0
19450	7	1	Tolita Pampa De Oro	71	20	0	2	2006-05-22	2006	0			NEGATIVO	0	0
19432	8	1	Tolita Pampa De Oro	71	20	0	2	2006-05-22	2006	0			NEGATIVO	0	0
19443	8	1	Tolita Pampa De Oro	71	20	0	1	2006-05-22	2006	0			NEGATIVO	0	0
19446	8	1	Tolita Pampa De Oro	71	20	0	2	2006-05-22	2006	0			NEGATIVO	0	0
19471	8	1	Tolita Pampa De Oro	71	20	0	1	2006-05-22	2006	0			NEGATIVO	0	0
19476	8	1	Tolita Pampa De Oro	71	20	0	1	2006-05-22	2006	0			NEGATIVO	0	0
19412	9	1	Tolita Pampa De Oro	71	20	0	2	2006-05-22	2006	0			NEGATIVO	0	0
19431	9	1	Tolita Pampa De Oro	71	20	0	2	2006-05-22	2006	0			NEGATIVO	0	0
19434	9	1	Tolita Pampa De Oro	71	20	0	2	2006-05-22	2006	0			NEGATIVO	0	0
19441	9	1	Tolita Pampa De Oro	71	20	0	1	2006-05-22	2006	0			NEGATIVO	0	0
19447	9	1	Tolita Pampa De Oro	71	20	0	1	2006-05-22	2006	0			NEGATIVO	0	0
19449	9	1	Tolita Pampa De Oro	71	20	0	2	2006-05-22	2006	0			NEGATIVO	0	0
19422	10	1	Tolita Pampa De Oro	71	20	0	2	2006-05-22	2006	0			NEGATIVO	0	0
19425	10	1	Tolita Pampa De Oro	71	20	0	1	2006-05-22	2006	0			NEGATIVO	0	0
19453	10	1	Tolita Pampa De Oro	71	20	0	1	2006-05-22	2006	0			NEGATIVO	0	0
19467	10	1	Tolita Pampa De Oro	71	20	0	1	2006-05-22	2006	0			NEGATIVO	0	0
19426	11	1	Tolita Pampa De Oro	71	20	0	1	2006-05-22	2006	0			NEGATIVO	0	0
19444	11	1	Tolita Pampa De Oro	71	20	0	2	2006-05-22	2006	0			NEGATIVO	0	0
19469	11	1	Tolita Pampa De Oro	71	20	0	1	2006-05-22	2006	0			NEGATIVO	0	0
19470	11	1	Tolita Pampa De Oro	71	20	0	2	2006-05-22	2006	0			NEGATIVO	0	0
19416	12	1	Tolita Pampa De Oro	71	20	0	2	2006-05-22	2006	0			NEGATIVO	0	0
19423	12	1	Tolita Pampa De Oro	71	20	0	2	2006-05-22	2006	0			NEGATIVO	0	0
19433	12	1	Tolita Pampa De Oro	71	20	0	1	2006-05-22	2006	0			NEGATIVO	0	0
19437	12	1	Tolita Pampa De Oro	71	20	0	1	2006-05-22	2006	0			NEGATIVO	0	0
19442	12	1	Tolita Pampa De Oro	71	20	0	1	2006-05-22	2006	0			NEGATIVO	0	0
19445	12	1	Tolita Pampa De Oro	71	20	0	2	2006-05-22	2006	0			NEGATIVO	0	0
19455	12	1	Tolita Pampa De Oro	71	20	0	1	2006-05-22	2006	0			NEGATIVO	0	0
19460	12	1	Tolita Pampa De Oro	71	20	0	1	2006-05-22	2006	0			NEGATIVO	0	0
19436	13	1	Tolita Pampa De Oro	71	20	0	2	2006-05-22	2006	0			NEGATIVO	0	0
19452	13	1	Tolita Pampa De Oro	71	20	0	2	2006-05-22	2006	0			NEGATIVO	0	0
19459	13	1	Tolita Pampa De Oro	71	20	0	1	2006-05-22	2006	0			NEGATIVO	0	0
19462	13	1	Tolita Pampa De Oro	71	20	0	1	2006-05-22	2006	0			NEGATIVO	0	0
19465	13	1	Tolita Pampa De Oro	71	20	0	2	2006-05-22	2006	0			NEGATIVO	0	0
19466	13	1	Tolita Pampa De Oro	71	20	0	1	2006-05-22	2006	0			NEGATIVO	0	0
19409	14	1	Tolita Pampa De Oro	71	20	0	1	2006-05-22	2006	0			NEGATIVO	0	0
19414	14	1	Tolita Pampa De Oro	71	20	0	2	2006-05-22	2006	0			NEGATIVO	0	0
19415	14	1	Tolita Pampa De Oro	71	20	0	1	2006-05-22	2006	0			NEGATIVO	0	0
19427	14	1	Tolita Pampa De Oro	71	20	0	2	2006-05-22	2006	0			NEGATIVO	0	0
19438	14	1	Tolita Pampa De Oro	71	20	0	2	2006-05-22	2006	0			NEGATIVO	0	0
19448	14	1	Tolita Pampa De Oro	71	20	0	2	2006-05-22	2006	0			NEGATIVO	0	0
19457	14	1	Tolita Pampa De Oro	71	20	0	2	2006-05-22	2006	0			NEGATIVO	0	0
19468	14	1	Tolita Pampa De Oro	71	20	0	1	2006-05-22	2006	0			NEGATIVO	0	0
19430	15	1	Tolita Pampa De Oro	71	20	0	1	2006-05-22	2006	0			NEGATIVO	0	0
19440	15	1	Tolita Pampa De Oro	71	20	0	1	2006-05-22	2006	0			NEGATIVO	0	0
19454	15	1	Tolita Pampa De Oro	71	20	0	1	2006-05-22	2006	0			NEGATIVO	0	0
19461	15	1	Tolita Pampa De Oro	71	20	0	1	2006-05-22	2006	0			NEGATIVO	0	0
19463	15	1	Tolita Pampa De Oro	71	20	0	1	2006-05-22	2006	0			NEGATIVO	0	0
19472	15	1	Tolita Pampa De Oro	71	20	0	2	2006-05-22	2006	0			NEGATIVO	0	0
19479	7	1	Tolita Pampa De Oro	71	20	0	2	2006-05-23	2006	0			NEGATIVO	0	0
19480	8	1	Tolita Pampa De Oro	71	20	0	1	2006-05-23	2006	0			NEGATIVO	0	0
19477	10	1	Tolita Pampa De Oro	71	20	0	1	2006-05-23	2006	0			NEGATIVO	0	0
19481	11	1	Tolita Pampa De Oro	71	20	0	2	2006-05-23	2006	0			NEGATIVO	0	0
19475	12	1	Tolita Pampa De Oro	71	20	0	2	2006-05-23	2006	0			NEGATIVO	0	0
19456	14	1	Tolita Pampa De Oro	71	20	0	2	2006-05-23	2006	0			NEGATIVO	0	0
19478	14	1	Tolita Pampa De Oro	71	20	0	1	2006-05-23	2006	0			NEGATIVO	0	0
19410	11	1	Tolita Pampa De Oro	71	20	0	2	2006-10-22	2006	0			NEGATIVO	0	0
19424	14	1	Tolita Pampa De Oro	71	20	0	1	2008-07-18	2008	0			NEGATIVO	0	0
19464	14	1	Tolita Pampa De Oro	71	20	0	1	2008-07-18	2008	0			NEGATIVO	0	0
[truncated: 2,433 more rows]

## Sheet: UCE BIOMED
Fecha Nac	Sexo	Fecha Muestra	Código	One Site rapid test Syphilis Ab Combo	DPP Syphilis Screen & confirm assay
2003-11-01	M	2014-05-20	BALS 101	No reactivo
2002-07-16	F	2014-05-20	BALS 102	No reactivo
2003-08-11	M	2014-05-20	BALS 103	No reactivo
2000-05-25	M	2014-05-20	BALS 104	No reactivo
2003-12-29	F	2014-05-20	BALS 105	No reactivo
2000-05-19	F	2014-05-20	BALS 106	No reactivo
2002-12-04	M	2014-05-20	BALS 107 B	No reactivo
2001-02-18	M	2014-05-20	BALS 108	No reactivo
2000-06-25	M	2014-05-20	BALS 109	No reactivo
2003-04-28	F	2014-05-20	BALS 110	No reactivo
2001-07-03	F	2014-05-20	BALS 113	No reactivo
2003-10-15	F	2014-05-20	BALS 114	No reactivo
2009-12-12	F	2015-07-13	BALS116 M	No reactivo
2010-10-14	F	2015-07-13	BALS117 M	No reactivo
2009-06-26	M	2015-07-13	BALS118 M	No reactivo
2009-12-16	F	2015-07-13	BALS119 M	No reactivo
2007-01-16	M	2015-07-13	BALS120 M	No reactivo
2009-09-29	F	2015-07-13	BALS121 M	No reactivo
2010-12-09	F	2015-07-13	BALS122 M	No reactivo
2009-03-21	M	2015-07-13	BALS123 M	No reactivo
2011-04-18	F	2015-07-13	BALS124 M	No reactivo
2009-06-10	M	2015-07-13	BALS127 M	No reactivo
2011-09-19	M	2015-07-13	BALS128 M	No reactivo
2009-06-05	M	2015-07-13	BALS129 M	No reactivo
2011-11-12	M	2015-07-13	BALS130 M	No reactivo
2009-09-25	M	2015-07-13	BALS132 M	No reactivo
2007-08-14	F	2015-07-13	BALS136 M	No reactivo
2006-04-03	F	2015-07-13	BALS137 M	No reactivo
2011-05-08	M	2015-07-13	BALS138 M	No reactivo
2003-12-29	F	2015-07-13	BALS140 M	No reactivo
2015-11-21	M	2018-06-21	BALS 141 M	No reactivo
2008-06-17	M	2015-07-13	BALS 601	No reactivo
2007-12-23	F	2015-07-13	BALS 602	No reactivo
2006-09-08	F	2015-07-13	BALS 603	No reactivo
2007-07-23	F	2015-07-13	BALS 605	No reactivo
2007-04-28	M	2015-07-13	BALS 606	No reactivo
2004-03-25	M	2015-07-13	BALS 608	No reactivo
2006-01-22	M	2015-07-13	BALS 609	No reactivo
2008-05-15	F	2015-07-13	BALS610	No reactivo
2008-07-23	F	2015-07-13	BALS 615	No reactivo
2004-12-23	F	2015-07-13	BALS 617	No reactivo
2006-11-06	M	2015-07-13	BALS 618	No reactivo
2008-08-31	M	2015-07-13	BALS 619	No reactivo
2008-07-15	F	2015-07-13	BALS 620	No reactivo
2004-08-02	F	2015-07-13	BALS 621	No reactivo
2004-04-24	M	2015-07-13	BALS 622	No reactivo
2005-11-08	F	2015-07-13	BALS 623	No reactivo
2007-08-21	F	2015-07-13	BALS 624	No reactivo
2005-06-29	F	2015-07-13	BALS 628	No reactivo
2007-05-19	F	2015-07-13	BALS 629	No reactivo
2001-03-15	M	2014-05-26	PAMB116	No reactivo
2003-09-30	F	2014-05-26	PAMB117	No reactivo
2002-11-18	M	2014-05-26	PAMB118	No reactivo
2000-12-30	F	2014-05-26	PAMB119	No reactivo
2002-12-25	F	2014-05-26	PAMB120	No reactivo
2002-07-04	F	2014-05-26	PAMB121	No reactivo
2001-10-22	M	2014-05-26	PAMB122	No reactivo
2001-10-10	F	2014-05-26	PAMB124	REACTIVO	No reactivo
2002-01-01	F	2014-05-26	PAMB125	No reactivo
2000-11-11	M	2014-05-26	PAMB126	No reactivo
2003-07-12	F	2014-05-26	PAMB127	No reactivo
2002-01-18	M	2014-05-26	PAMB130	No reactivo
2001-12-16	M	2014-05-26	PAMB132	No reactivo
2001-06-15	F	2014-05-26	PAMB133	No reactivo
2001-05-01	F	2014-05-26	PAMB134	No reactivo
2001-12-28	M	2014-05-26	PAMB138	No reactivo
2011-09-01	F	2015-07-10	PAMB139 M	No reactivo
2002-01-08	M	2015-07-10	PAMB140 M	No reactivo
2003-09-27	M	2015-07-10	PAMB141 M	No reactivo
2008-04-06	F	2015-07-10	PAMB142 M	No reactivo
2009-09-19	M	2015-07-10	PAMB143 M	No reactivo
2011-07-14	F	2015-07-10	PAMB144 M	No reactivo
2013-08-29	M	2015-07-10	PAMB145 M	No reactivo
2008-08-06	F	2015-07-10	PAMB146 M	No reactivo
2010-11-23	M	2015-07-10	PAMB147 M	No reactivo
2011-10-15	F	2015-07-10	PAMB148 M	No reactivo
2012-12-28	M	2015-07-10	PAMB149 M	No reactivo
2010-10-26	F	2015-07-10	PAMB150 M	No reactivo
2009-08-04	M	2015-07-10	PAMB151 M	No reactivo
2009-06-04	M	2015-07-10	PAMB152 M	No reactivo
2012-11-21	F	2015-07-10	PAMB153 M	No reactivo
2009-04-06	F	2015-07-10	PAMB154 M	No reactivo
2011-05-09	F	2015-07-10	PAMB155 M	No reactivo
2009-05-03	M	2015-07-10	PAMB156 M	No reactivo
2006-10-26	F	2015-07-10	PAMB157 M	No reactivo
2004-01-07	F	2015-07-10	PAMB158 M	REACTIVO	No reactivo
2011-04-12	M	2015-07-10	PAMB159 M	No reactivo
2010-04-05	M	2015-07-10	PAMB160 M	No reactivo
2008-01-16	M	2015-07-10	PAMB161 M	No reactivo
2003-11-03	F	2015-07-10	PAMB162 M	No reactivo
2010-02-22	M	2015-07-10	PAMB163 M	No reactivo
2005-08-10	M	2015-07-10	PAMB164 M	No reactivo
2008-11-30	F	2015-07-10	PAMB165 M	No reactivo
2006-09-03	M	2015-07-10	PAMB166 M	No reactivo
2009-09-28	M	2015-07-10	PAMB167 M	No reactivo
2002-11-12	F	2015-07-10	PAMB168 M	No reactivo
2009-04-08	F	2015-07-10	PAMB169 M	No reactivo
2012-04-21	M	2015-07-10	PAMB170 M	No reactivo
2011-05-05	F	2015-07-10	PAMB171 M	No reactivo
2009-02-02	F	2015-07-10	PAMB172 M	No reactivo
2006-07-17	F	2015-07-10	PAMB173 M	No reactivo
2004-01-01	F	2015-07-10	PAMB174 M	No reactivo
2010-04-27	F	2015-07-10	PAMB175 M	No reactivo
2001-10-22	M	2015-07-10	PAMB177 M	No reactivo
2008-01-24	M	2015-07-10	PAMB631	No reactivo
2006-12-29	F	2015-07-10	PAMB632	No reactivo
2005-06-05	M	2015-07-10	PAMB634	No reactivo
2007-11-20	F	2015-07-10	PAMB635	No reactivo
2005-01-18	M	2015-07-10	PAMB636	No reactivo
2007-07-23	M	2015-07-10	PAMB637	No reactivo
2004-06-05	F	2015-07-10	PAMB638	No reactivo
2007-06-19	M	2015-07-10	PAMB639	No reactivo
2005-03-01	F	2015-07-10	PAMB645	No reactivo
2004-07-20	F	2015-07-10	PAMB646	No reactivo
2006-11-22	F	2015-07-10	PAMB647	No reactivo
2004-06-19	M	2015-07-10	PAMB648	No reactivo
2005-06-07	M	2015-07-10	PAMB650	No reactivo
2007-03-07	F	2015-07-10	PAMB651	No reactivo
2004-12-11	M	2015-07-10	PAMB656	No reactivo
2008-08-04	F	2015-07-10	PAMB657	No reactivo
2000-05-12	F	2014-06-04	GUAD139	No reactivo
2003-01-24	M	2014-06-04	GUAD140	No reactivo
2003-04-02	F	2014-06-04	GUAD141	No reactivo
2000-05-20	F	2014-06-04	GUAD142	No reactivo
2002-05-08	F	2014-06-04	GUAD143	No reactivo
2003-07-12	F	2014-06-04	GUAD146	No reactivo
2001-03-18	F	2014-06-04	GUAD148	No reactivo
2001-06-21	F	2014-06-04	GUAD150	No reactivo
2004-06-15	M	2014-06-04	GUAD151	No reactivo
2004-06-15	F	2014-06-04	GUAD152	No reactivo
2003-11-25	M	2014-06-04	GUAD153	No reactivo
2004-07-09	F	2014-06-04	GUAD154	No reactivo
2002-03-14	M	2014-06-04	GUAD168	No reactivo
2010-07-18	F	2015-07-27	GUAD171 M	No reactivo
2009-03-11	F	2015-07-27	GUAD173 M	No reactivo
2012-07-12	F	2015-07-27	GUAD174 M	No reactivo
2006-07-05	F	2015-07-27	GUAD175 M	No reactivo
2001-03-17	F	2015-07-27	GUAD176 M	No reactivo
2001-05-21	F	2015-07-27	GUAD178 M	No reactivo
2003-03-13	M	2015-07-27	GUAD179 M	No reactivo
2012-05-16	M	2015-07-27	GUAD180 M	No reactivo
2012-04-05	F	2015-07-27	GUAD181 M	No reactivo
2008-08-21	M	2015-07-27	GUAD182 M	No reactivo
2004-06-23	M	2015-07-27	GUAD182 M2	No reactivo
2002-08-13	M	2015-07-27	GUAD183 M	No reactivo
2011-09-11	F	2015-07-27	GUAD184 M	No reactivo
1998-10-17	F	2015-07-27	GUAD185 M	No reactivo
2006-04-06	F	2015-07-27	GUAD187 M	No reactivo
2010-09-20	M	2015-07-27	GUAD 665	No reactivo
2010-12-05	M	2015-07-27	GUAD 666	No reactivo
2004-07-19	M	2015-07-27	GUAD 667	No reactivo
2008-01-28	M	2015-07-27	GUAD 668	No reactivo
2006-11-20	F	2015-07-27	GUAD 669	No reactivo
2006-10-15	M	2015-07-27	GUAD 670	No reactivo
2009-09-08	F	2015-07-27	GUAD 671	No reactivo
2011-06-30	M	2015-07-27	GUAD 672	No reactivo
2008-06-23	F	2015-07-27	GUAD 673	No reactivo
2009-02-08	F	2015-07-27	GUAD 674	No reactivo
2008-08-19	M	2015-07-27	GUAD 676	No reactivo
2012-11-16	M	2018-06-21	GUAD 677	No reactivo
2004-10-03	M	2014-06-03	BOGO156	No reactivo
2000-03-01	M	2014-06-03	BOGO157	No reactivo
2003-05-28	M	2014-06-03	BOGO158	No reactivo
2003-04-20	F	2014-06-03	BOGO159	No reactivo
2005-09-06	F	2014-06-03	BOGO160	No reactivo
2000-12-10	F	2014-06-03	BOGO162	No reactivo
2010-08-13	F	2017-03-19	BOGO163	No reactivo
2013-03-20	M	2017-03-19	BOGO 164	No reactivo
2011-11-04	F	2017-03-19	BOGO167	No reactivo
2013-01-23	M	2017-03-19	BOGO168	No reactivo
2007-03-12	F	2017-03-19	BOGO169	No reactivo
2011-06-19	F	2017-03-19	BOGO170	No reactivo
2008-05-16	M	2017-04-21	BOGO 171	No reactivo
2006-09-12	F	2017-04-21	BOGO 172	No reactivo
2000-08-04	M	2014-06-02	UNI166	No reactivo
2004-03-15	M	2014-06-02	UNI167	No reactivo
2002-09-30	M	2014-06-02	UNI169	No reactivo
2000-06-15	M	2014-06-02	UNI170	No reactivo
2002-10-15	M	2014-06-02	UNI171	No reactivo
2001-09-07	F	2014-06-02	UNI174	No reactivo
2005-07-27	M	2014-06-02	UNI175	No reactivo
2003-07-03	M	2014-06-02	UNI176	No reactivo
2001-03-17	F	2014-06-02	UNI177	No reactivo
2003-06-16	F	2014-06-02	UNI178	No reactivo
2002-06-15	F	2014-06-02	UNI180	No reactivo
2000-07-11	F	2014-06-02	UNI182	No reactivo
2002-08-28	M	2014-06-02	UNI183	No reactivo
2005-12-31	F	2014-06-02	UNI184	No reactivo
2004-03-09	F	2014-06-02	UNI185	No reactivo
2002-06-10	F	2014-06-02	UNI186	No reactivo
2004-03-01	M	2014-06-02	UNI188	No reactivo
2011-06-11	M	2017-03-20	UNI189	No reactivo
2013-01-27	M	2017-03-20	UNI190	No reactivo
2011-02-11	M	2017-03-20	UNI191	No reactivo
2007-07-17	M	2017-03-20	UNI192	No reactivo
2009-05-26	M	2017-03-20	UNI193	No reactivo
2013-02-05	M	2017-03-20	UNI194	No reactivo
2008-06-15	F	2017-04-21	UNI 195	No reactivo
2013-08-27	F	2017-04-21	UNI 196	No reactivo
2004-06-15	M	2017-04-21	UNI 197	No reactivo
2007-12-07	F	2015-07-28	UNI709	No reactivo
2010-05-27	M	2015-07-28	UNI710	No reactivo
2007-06-15	F	2015-07-28	UNI711	No reactivo
2009-09-28	M	2015-07-28	UNI712	No reactivo
2006-03-03	F	2015-07-28	UNI729	No reactivo
2008-12-02	M	2015-07-28	UNI730	No reactivo
2012-02-07	M	2014-06-25	MATA191	No reactivo
2004-07-24	F	2014-06-25	MATA192	No reactivo
2002-02-21	F	2014-06-25	MATA193	No reactivo
2004-03-17	F	2014-06-25	MATA194	No reactivo
2001-06-22	F	2014-06-25	MATA195	No reactivo
2001-10-13	F	2014-06-25	MATA196	No reactivo
2003-07-13	F	2014-06-25	MATA197	No reactivo
2002-09-09	F	2014-06-25	MATA200	No reactivo
2004-06-20	M	2014-06-25	MATA201	No reactivo
2000-01-30	F	2014-06-25	MATA202	No reactivo
2011-10-08	M	2014-06-25	MATA204	No reactivo
2004-11-19	F	2014-06-25	MATA206	No reactivo
2002-05-18	M	2014-06-25	MATA208	No reactivo
2002-03-08	F	2014-06-25	MATA210	No reactivo
2004-11-19	M	2014-06-25	MATA211	No reactivo
2012-11-24	M	2015-09-05	MATA 214M	No reactivo
2012-04-17	F	2015-09-05	MATA 215M	No reactivo
2012-04-02	F	2015-09-05	MATA 216M	No reactivo
2011-02-17	F	2015-09-05	MATA 217M	No reactivo
2001-12-02	M	2015-09-05	MATA 219M	No reactivo
2006-02-02	F	2015-09-05	MATA 220M	No reactivo
2008-08-04	M	2015-09-05	MATA 221M	No reactivo
2011-01-31	M	2015-09-05	MATA 222M	No reactivo
2002-04-25	F	2015-09-05	MATA 223M	No reactivo
2006-10-17	F	2015-09-05	MATA 224M	No reactivo
2011-12-25	F	2015-09-05	MATA 225M	No reactivo
2006-06-15	M	2015-09-05	MATA 226M	No reactivo
2008-02-16	M	2015-09-05	MATA 227M	No reactivo
2005-01-29	M	2015-09-05	MATA 228M	No reactivo
2012-01-15	F	2015-09-05	MATA 229M	No reactivo
2005-08-20	M	2015-09-05	MATA 230M	No reactivo
2002-11-02	M	2015-09-05	MATA 231M	No reactivo
2007-06-05	F	2015-09-05	MATA 232M	No reactivo
2004-05-17	F	2015-09-05	MATA 233M	No reactivo
2011-11-30	F	2015-09-05	MATA 234M	No reactivo
2009-01-09	F	2015-09-05	MATA 235M	No reactivo
2008-11-19	M	2015-09-05	MATA 237M	No reactivo
2010-05-21	F	2015-09-05	MATA 239M	No reactivo
2007-10-07	F	2015-09-05	MATA 240M	No reactivo
2004-09-29	M	2015-09-05	MATA 241M	No reactivo
2004-12-23	M	2015-09-05	MATA 242M	No reactivo
2001-07-31	M	2015-09-05	MATA 243M	No reactivo
2007-08-12	F	2015-09-05	MATA 245M	No reactivo
2003-06-02	F	2015-09-05	MATA 247M	No reactivo
2009-11-24	M	2015-09-05	MATA 248M	No reactivo
2008-08-28	M	2015-09-05	MATA 249M	No reactivo
2005-09-11	M	2015-09-05	MATA 250M	No reactivo
2012-03-06	F	2015-09-05	MATA 251M	No reactivo
2003-08-18	F	2015-09-05	MATA 252M	No reactivo
2005-06-05	F	2015-09-05	MATA 255M	No reactivo
2008-10-23	F	2015-09-05	MATA 256M	No reactivo
2010-08-17	F	2015-09-05	MATA 257M	No reactivo
2008-02-28	F	2015-09-05	MATA 258M	No reactivo
2006-04-09	F	2015-09-05	MATA 259M	No reactivo
2003-09-24	F	2015-09-05	MATA 260M	No reactivo
2001-03-16	M	2015-09-05	MATA 261M	No reactivo
2015-02-10	M	2015-10-21	MATA 263 M	No reactivo
2007-06-24	F	2015-09-05	MATA 736	No reactivo
2012-02-11	M	2015-09-05	MATA 737	No reactivo
2006-10-24	F	2015-09-05	MATA 738	No reactivo
2008-11-06	F	2015-09-05	MATA 739	No reactivo
2008-10-27	M	2015-09-05	MATA 740	No reactivo
2005-07-12	M	2015-09-05	MATA 742	No reactivo
2007-08-01	M	2015-09-05	MATA 743	No reactivo
2010-07-26	F	2015-09-05	MATA 769	No reactivo
2007-04-01	F	2015-09-05	MATA 770	No reactivo
2009-02-25	M	2015-09-05	MATA 774	No reactivo
2005-02-25	F	2015-09-05	MATA 779	No reactivo
2006-12-06	M	2015-09-05	MATA 780	No reactivo
2008-09-13	F	2015-09-05	MATA 781	No reactivo
			276	276
